# Supplementary material for: Zebrafish models of alx-linked frontonasal dysplasia reveal a role for Alx1 and Alx3 in the anterior segment and vasculature of the developing eye
Source: PubMed Central journal article supplement (PMC9167625; doi:10.1242/bio.059189), 2022-05-26
Supplement: biolopen-11-059189-s1.pdf [file biolopen-11-059189-s1.pdf]

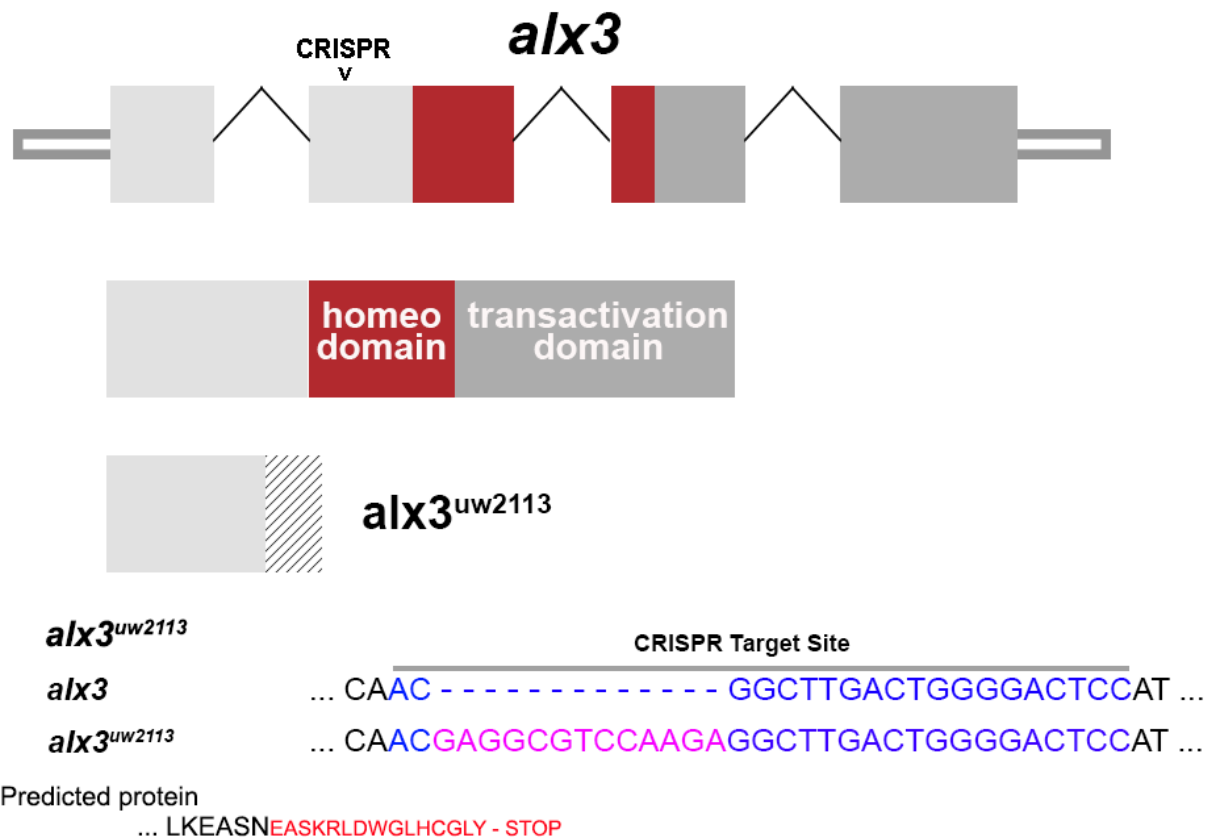

**Fig. S1. Generation of mutant alleles at the zebrafish *alx3* locus.** *alx3* mutations were induced by CRISPR/Cas9 mutagenesis targeted to the second exon of the *alx3* locus. *alx3<sup>uw2113</sup>* allele contains a net insertion of 13 nt (magenta letters) which is predicted to cause a frameshift and a premature stop (red letters).

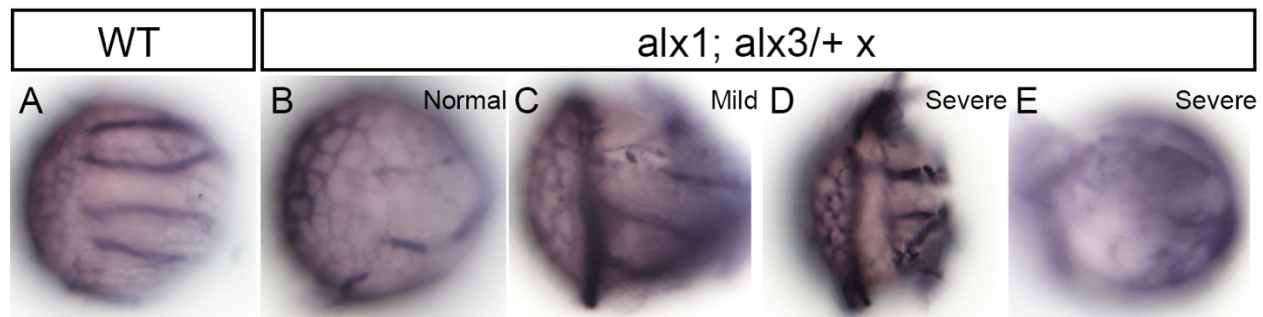

**Fig. S2. *alx1* and *alx3* are required for hyaloid vascular patterning.** Embryos derived from WT (A) or *alx1; alx3/+* (B – E) parents were first scored for the presence of misshapen eyes and stained for alkaline phosphatase to visualize hyaloid vasculature that surrounds the lens at 5 dpf. A: Normal hyaloid pattern in WT (6/6), B: Reduced hyaloid network formation in embryo with normally shaped eyes (5/6), C: Embryos with mildly misshapen eyes and disorganized hyaloid pattern (5/6). D-E: Embryos with severely misshapen eyes and disorganized (D; 2/5) or no hyaloid vasculature (E; 2/5 lens).



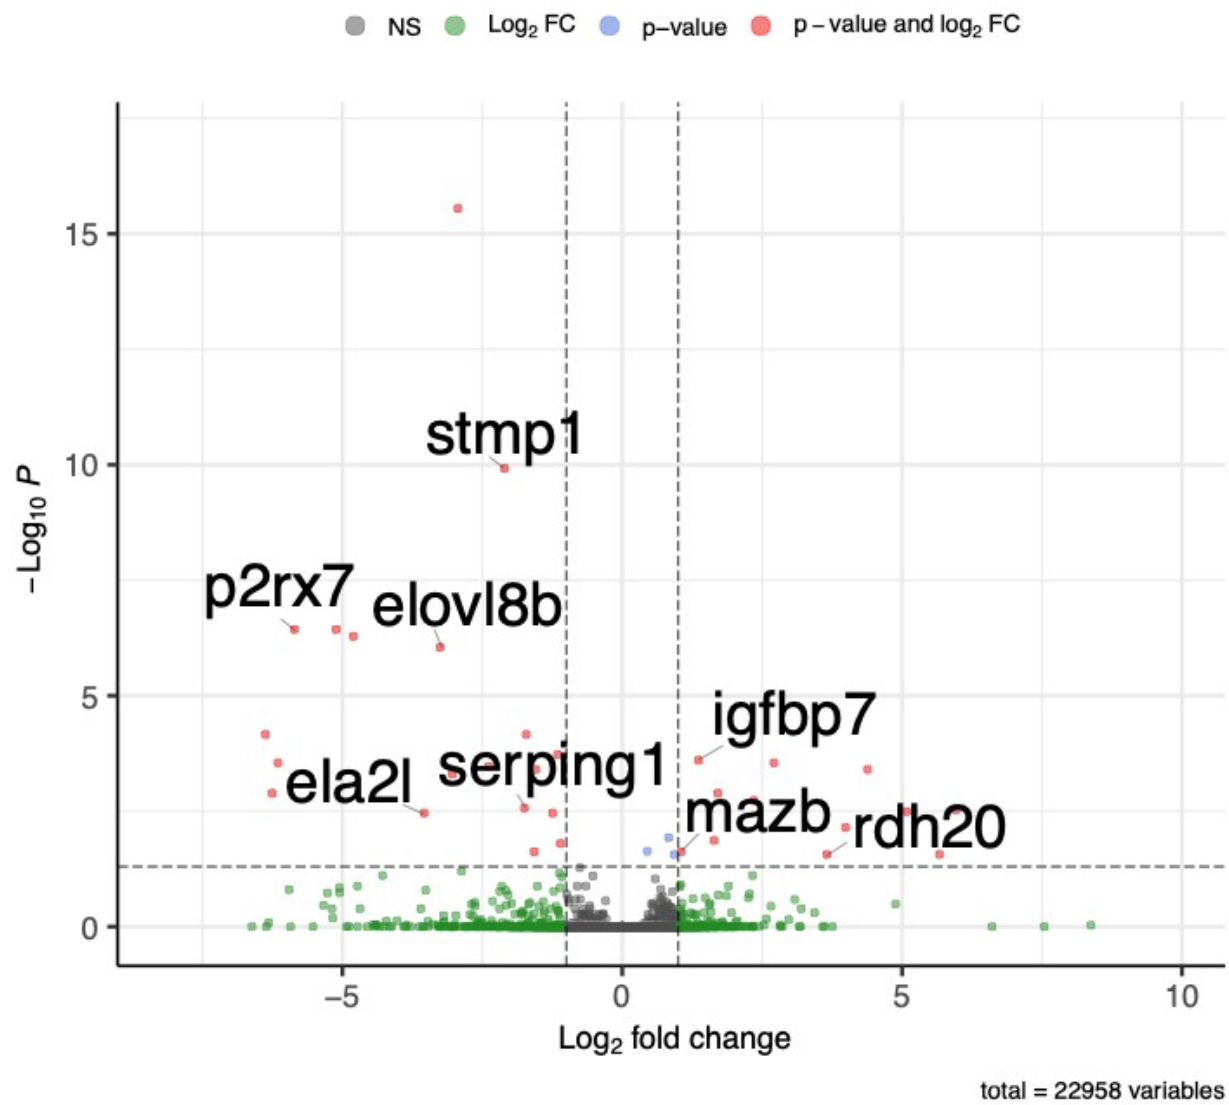

**Fig. S3. Differentially expressed genes in *alx1;alx3/+* mutants relative to wildtype siblings.** A heat map (A) and volcano plot diagram (B) of differentially expressed genes in *alx1;alx3/+* mutants relative to wildtype siblings (see Figure 6 for details).

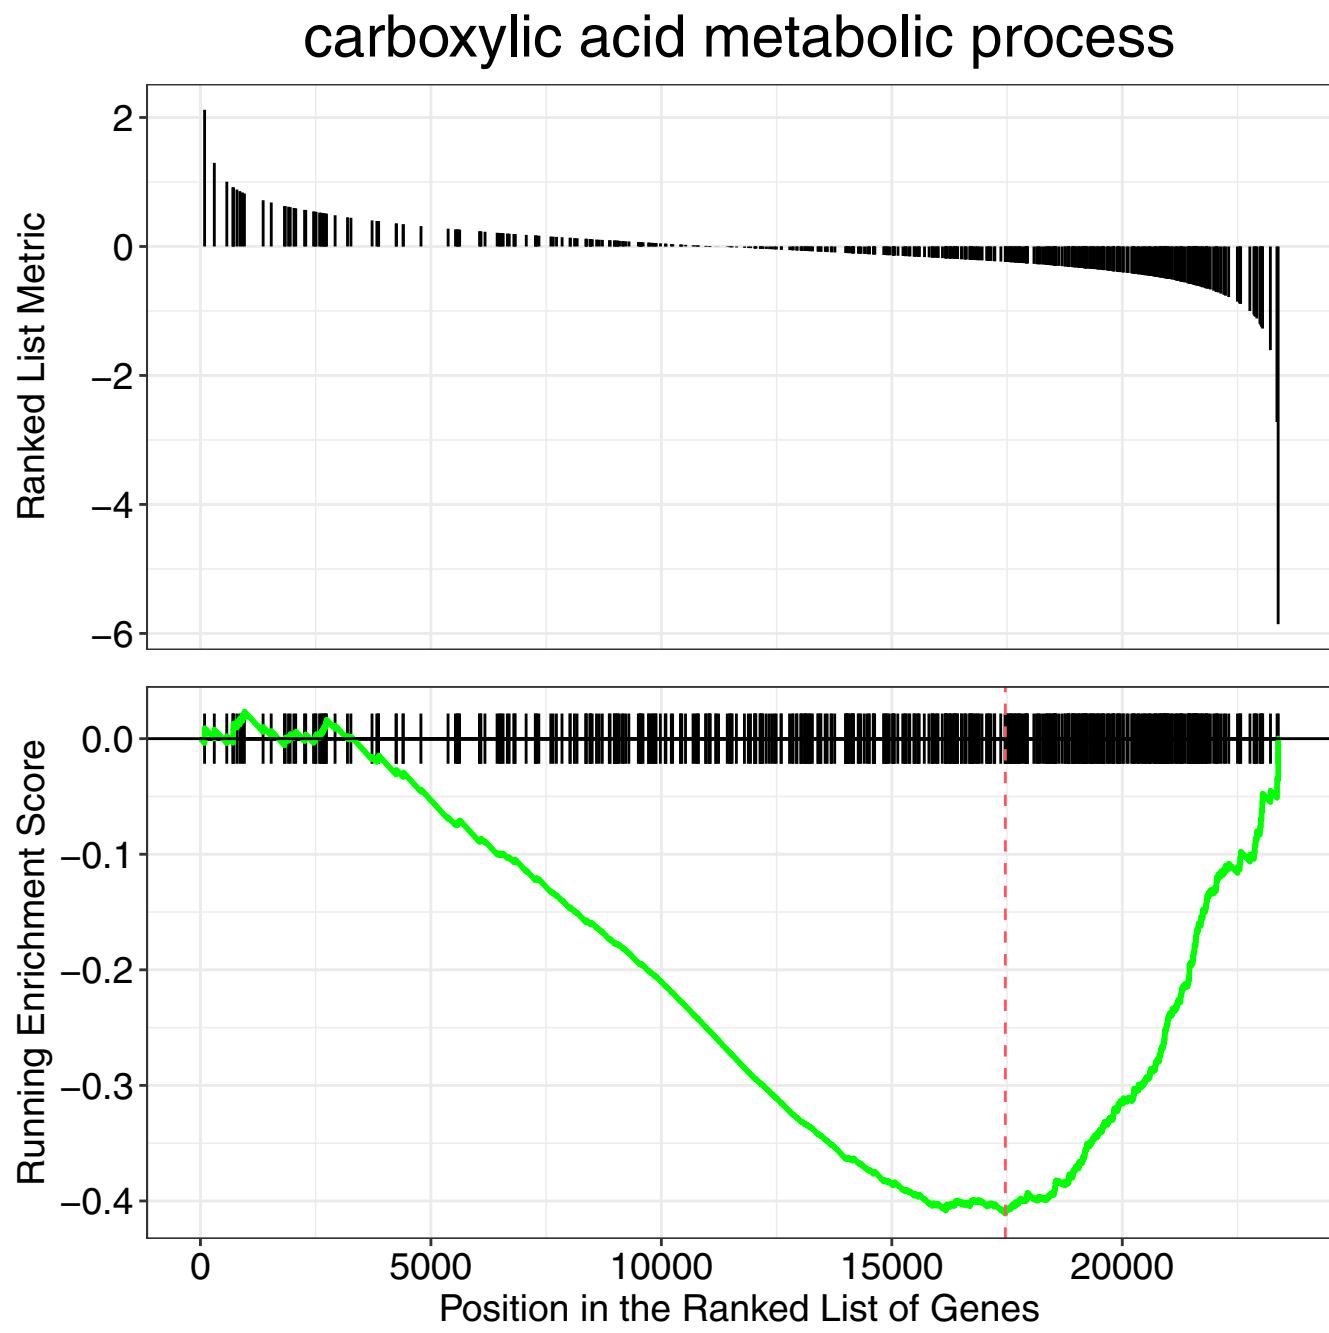

### serine-type peptidase activity

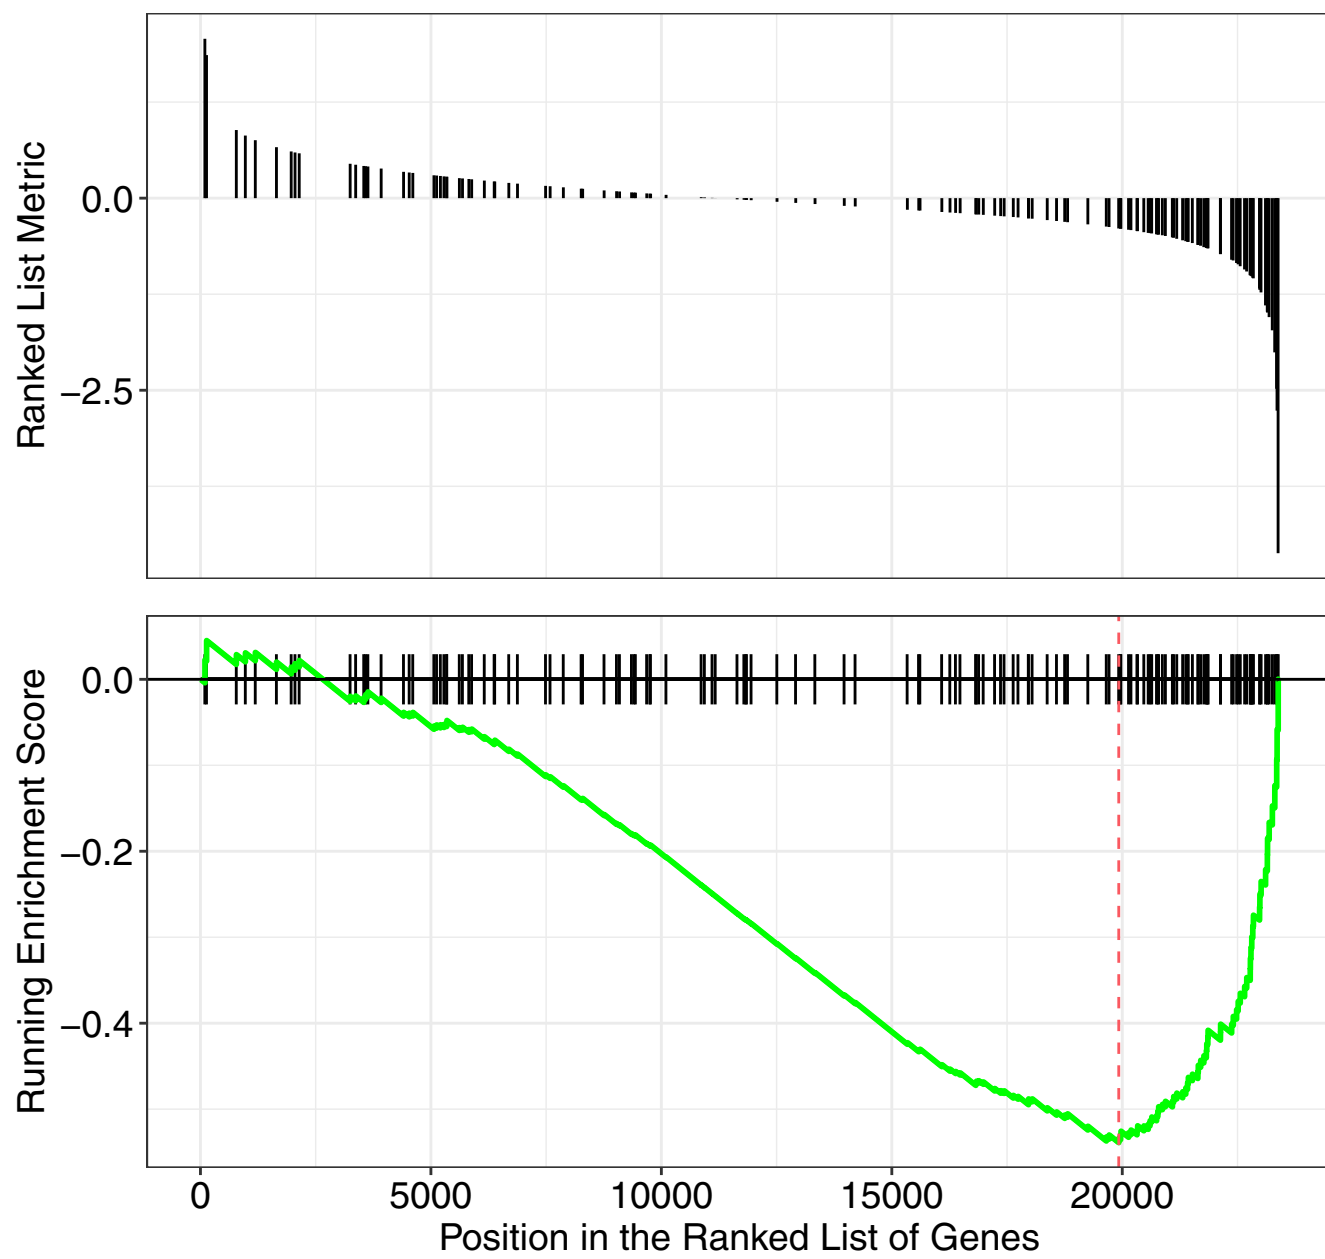

### serine hydrolase activity

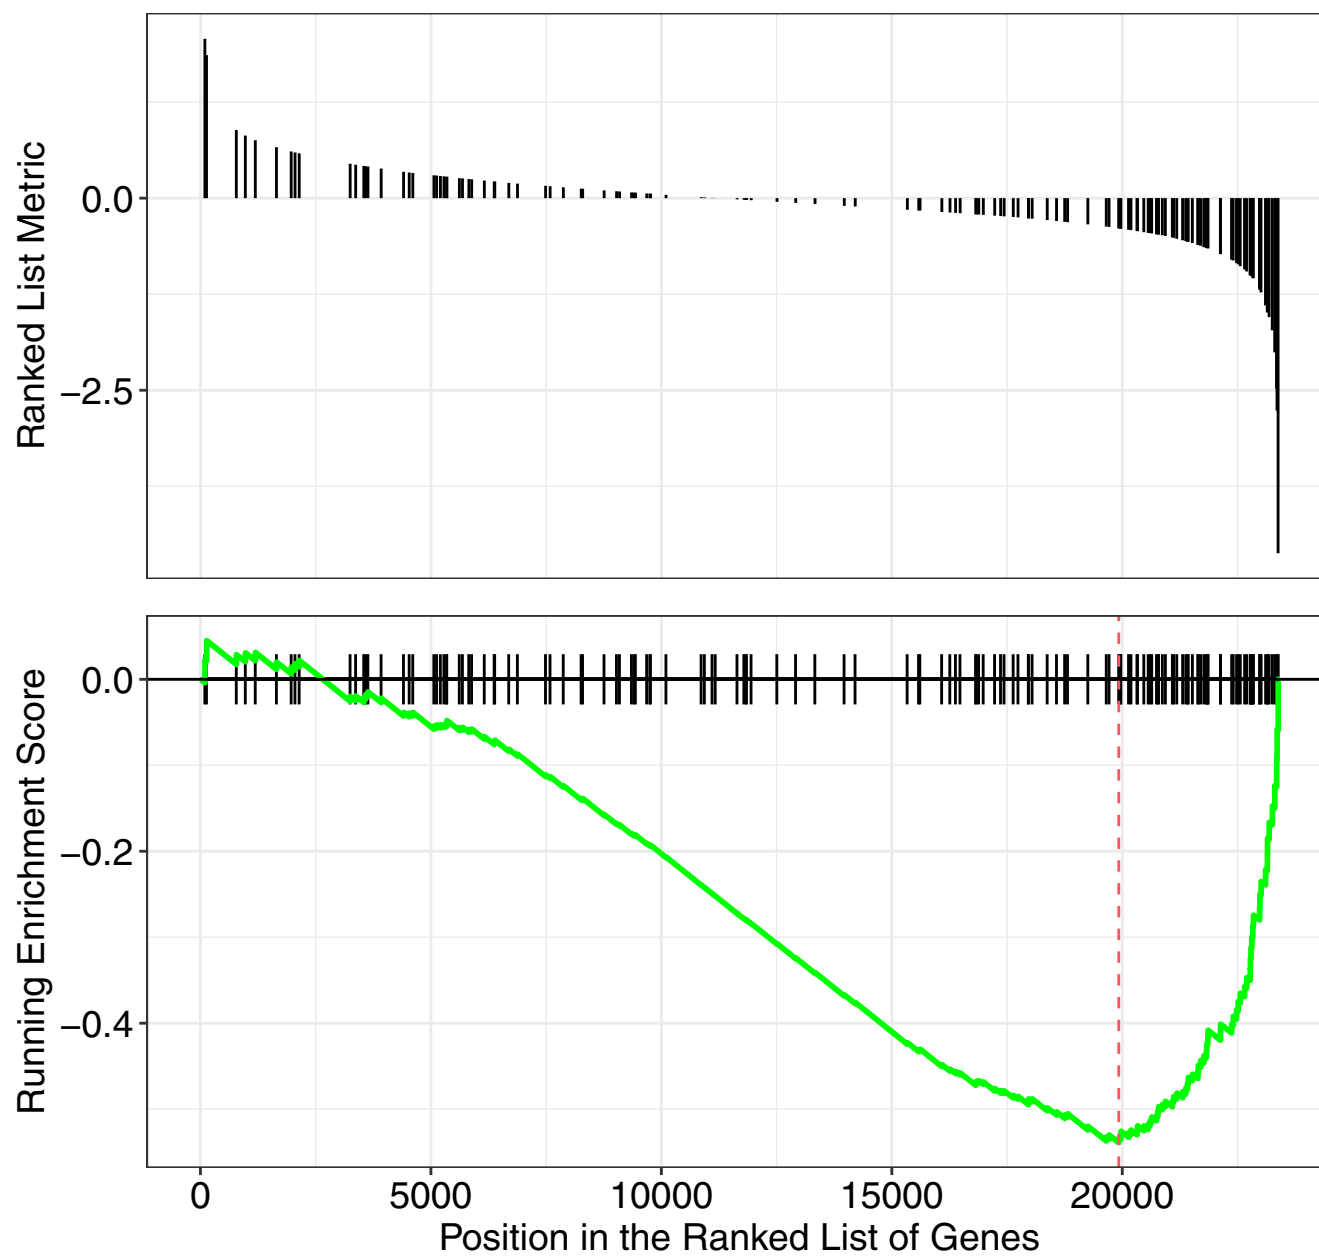

### serine-type endopeptidase activity

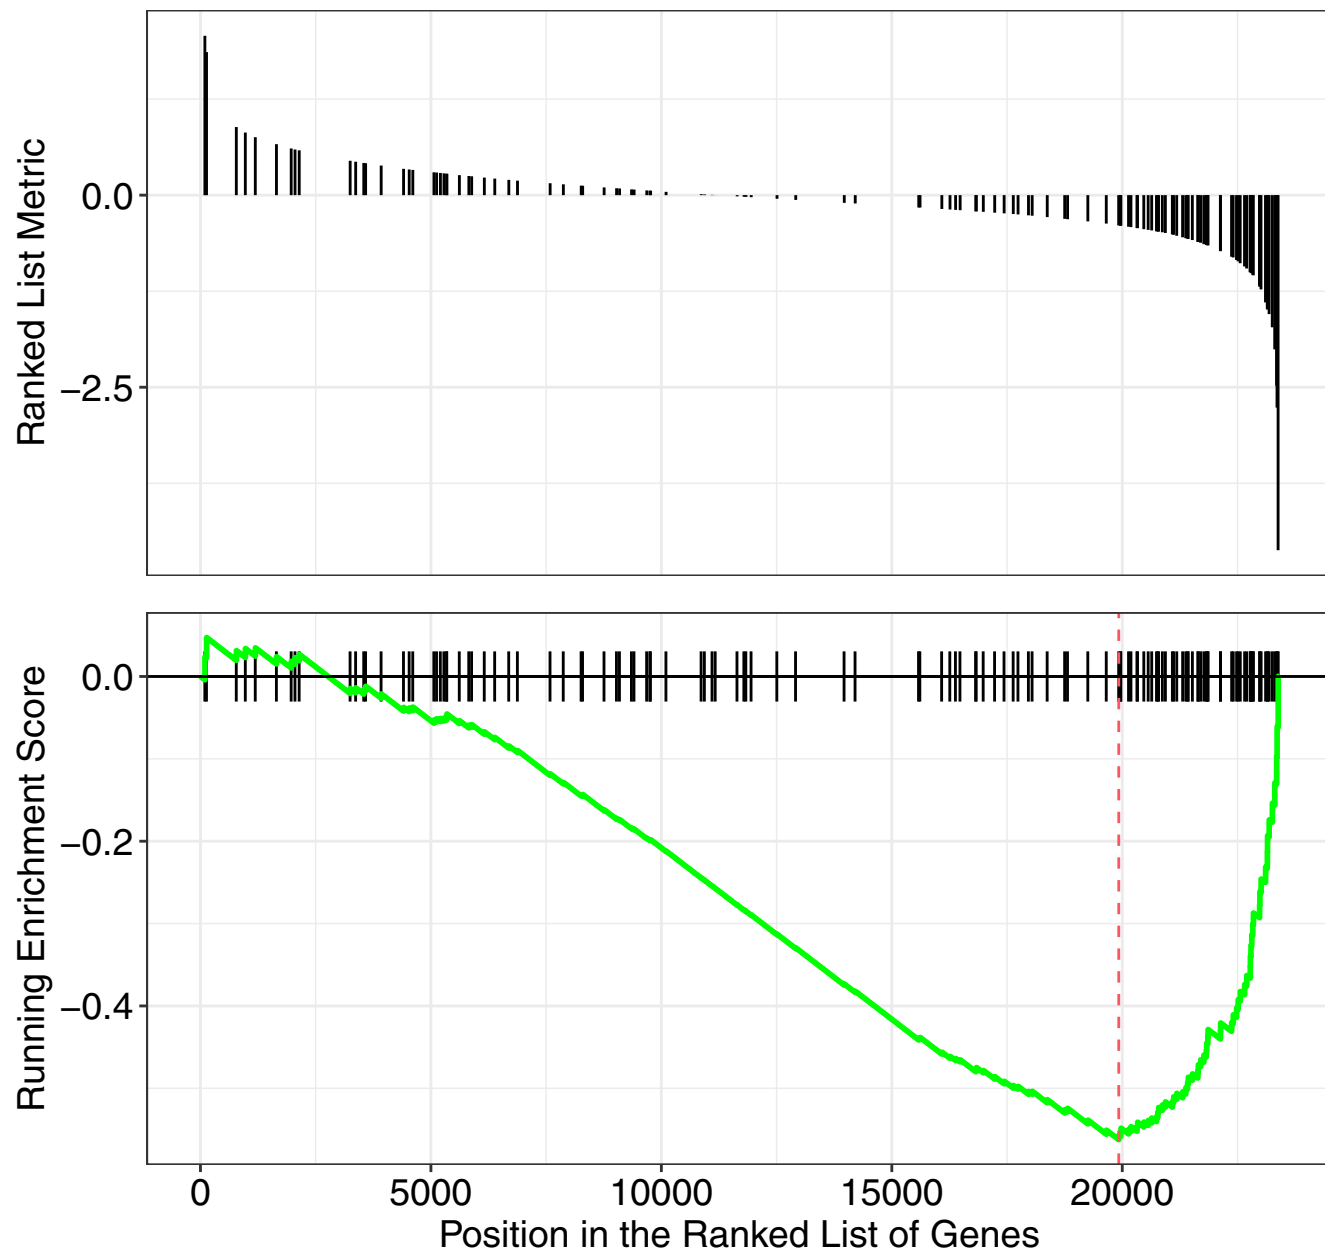

### monooxygenase activity

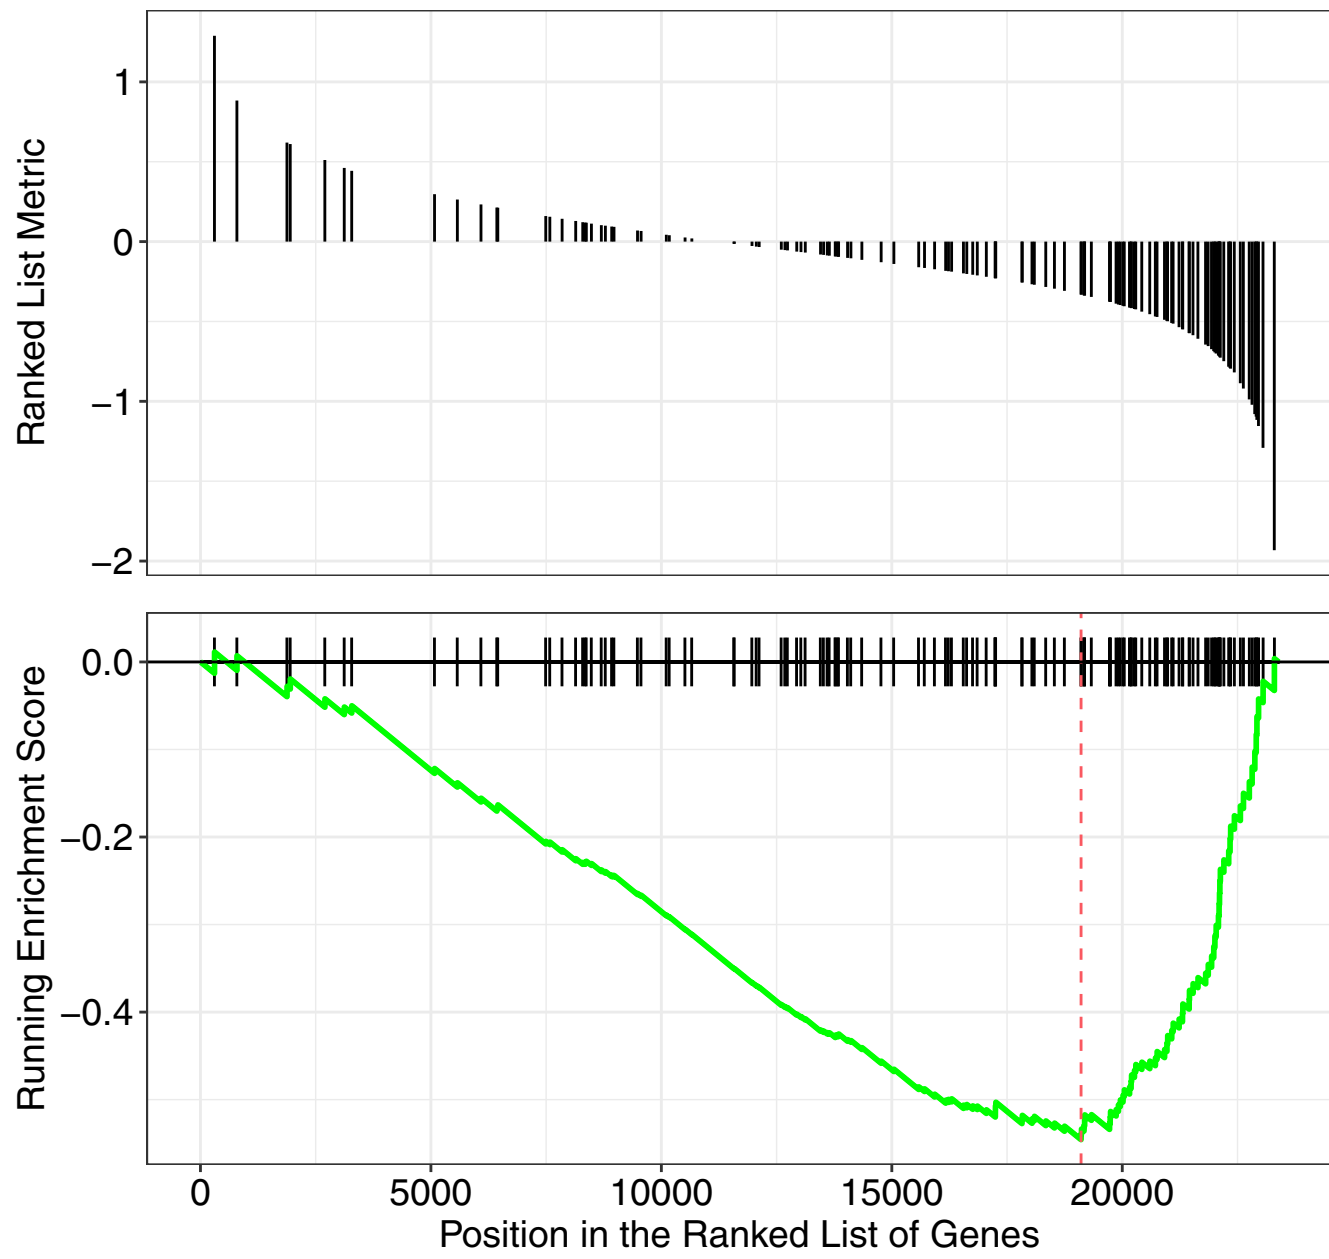

### fatty acid metabolic process

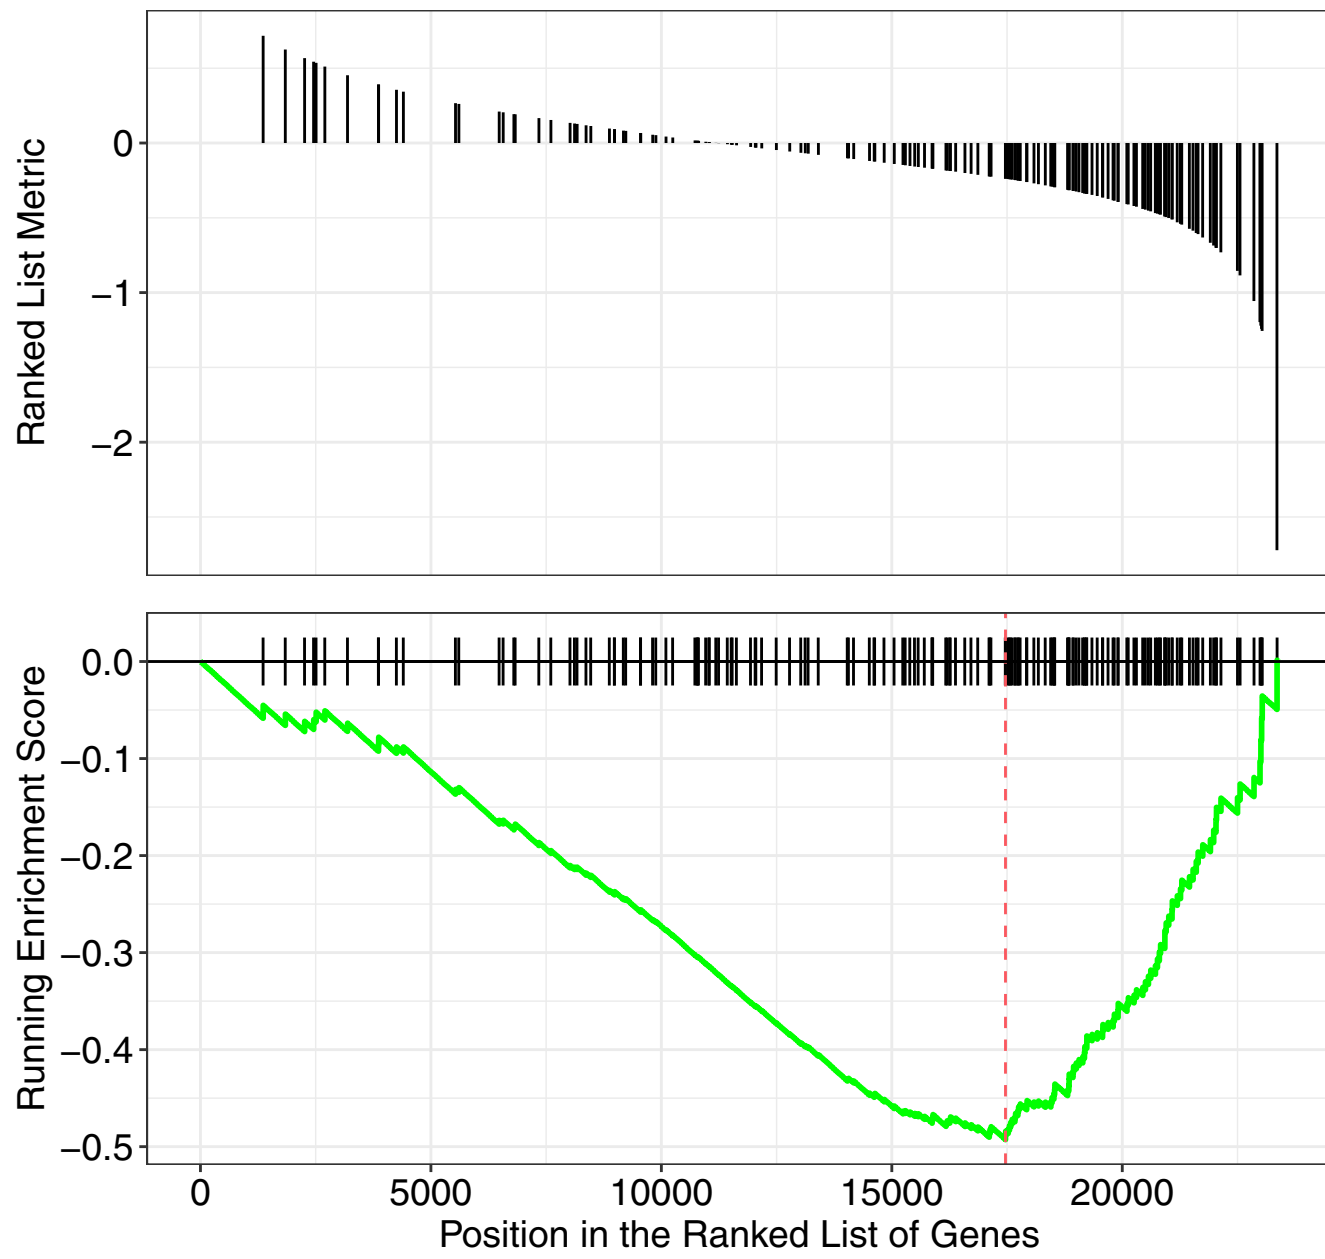

### carboxylic acid catabolic process

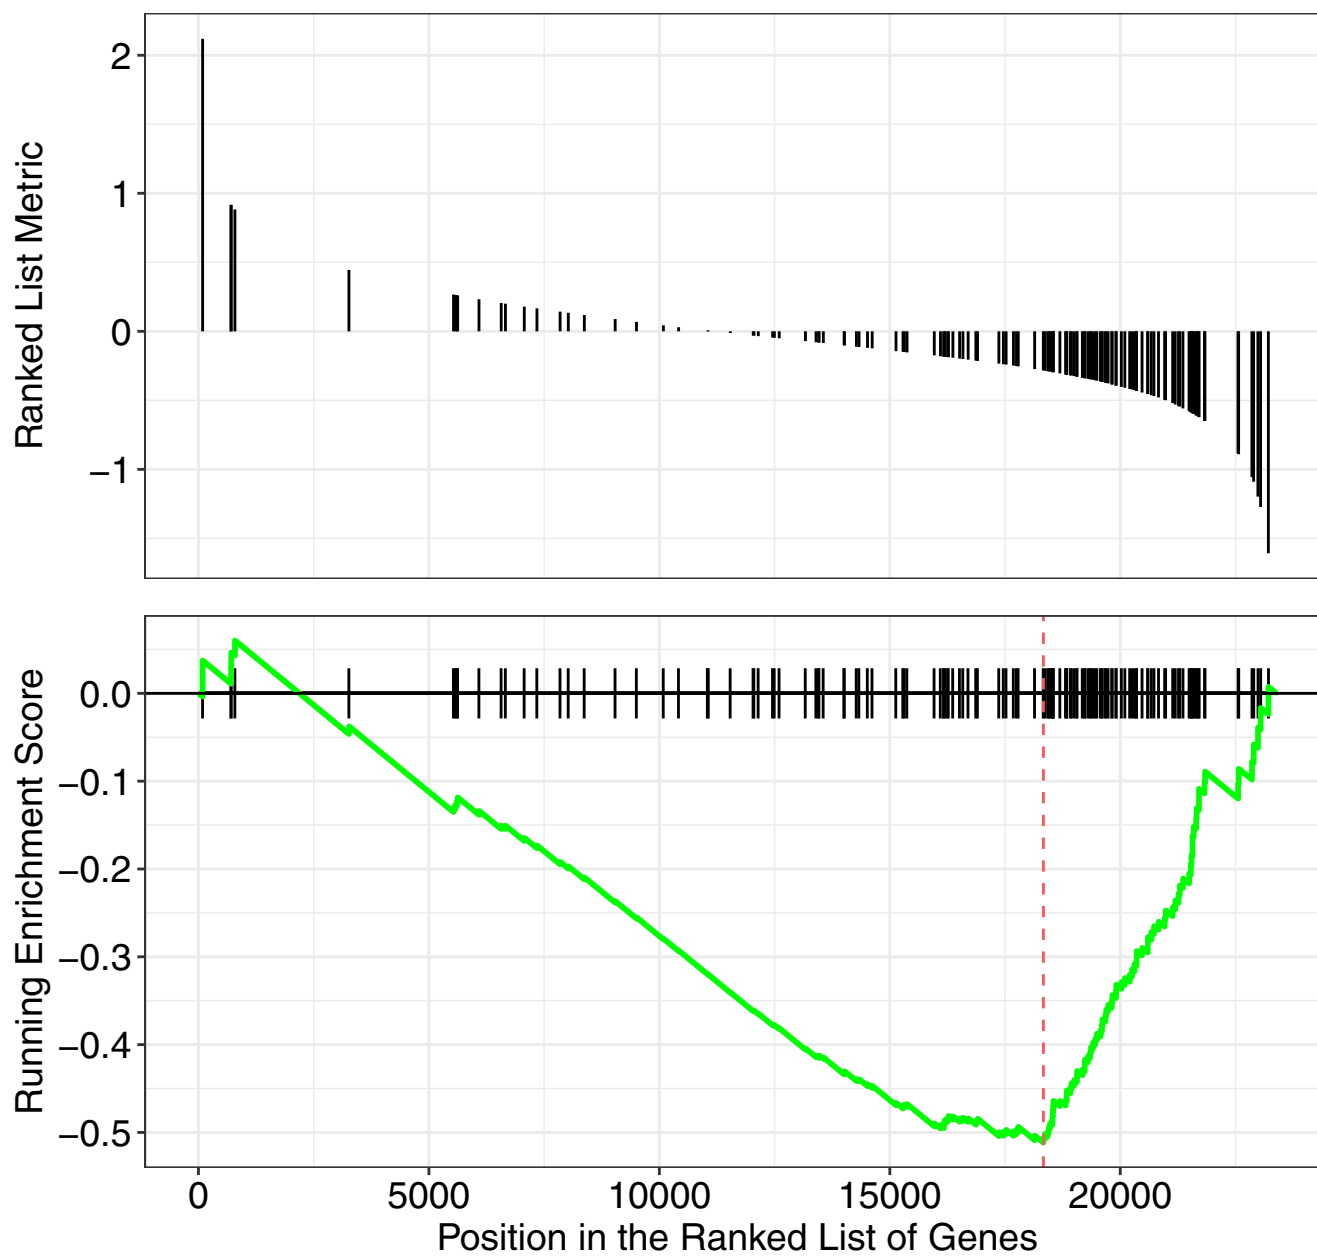



## ncRNA processing

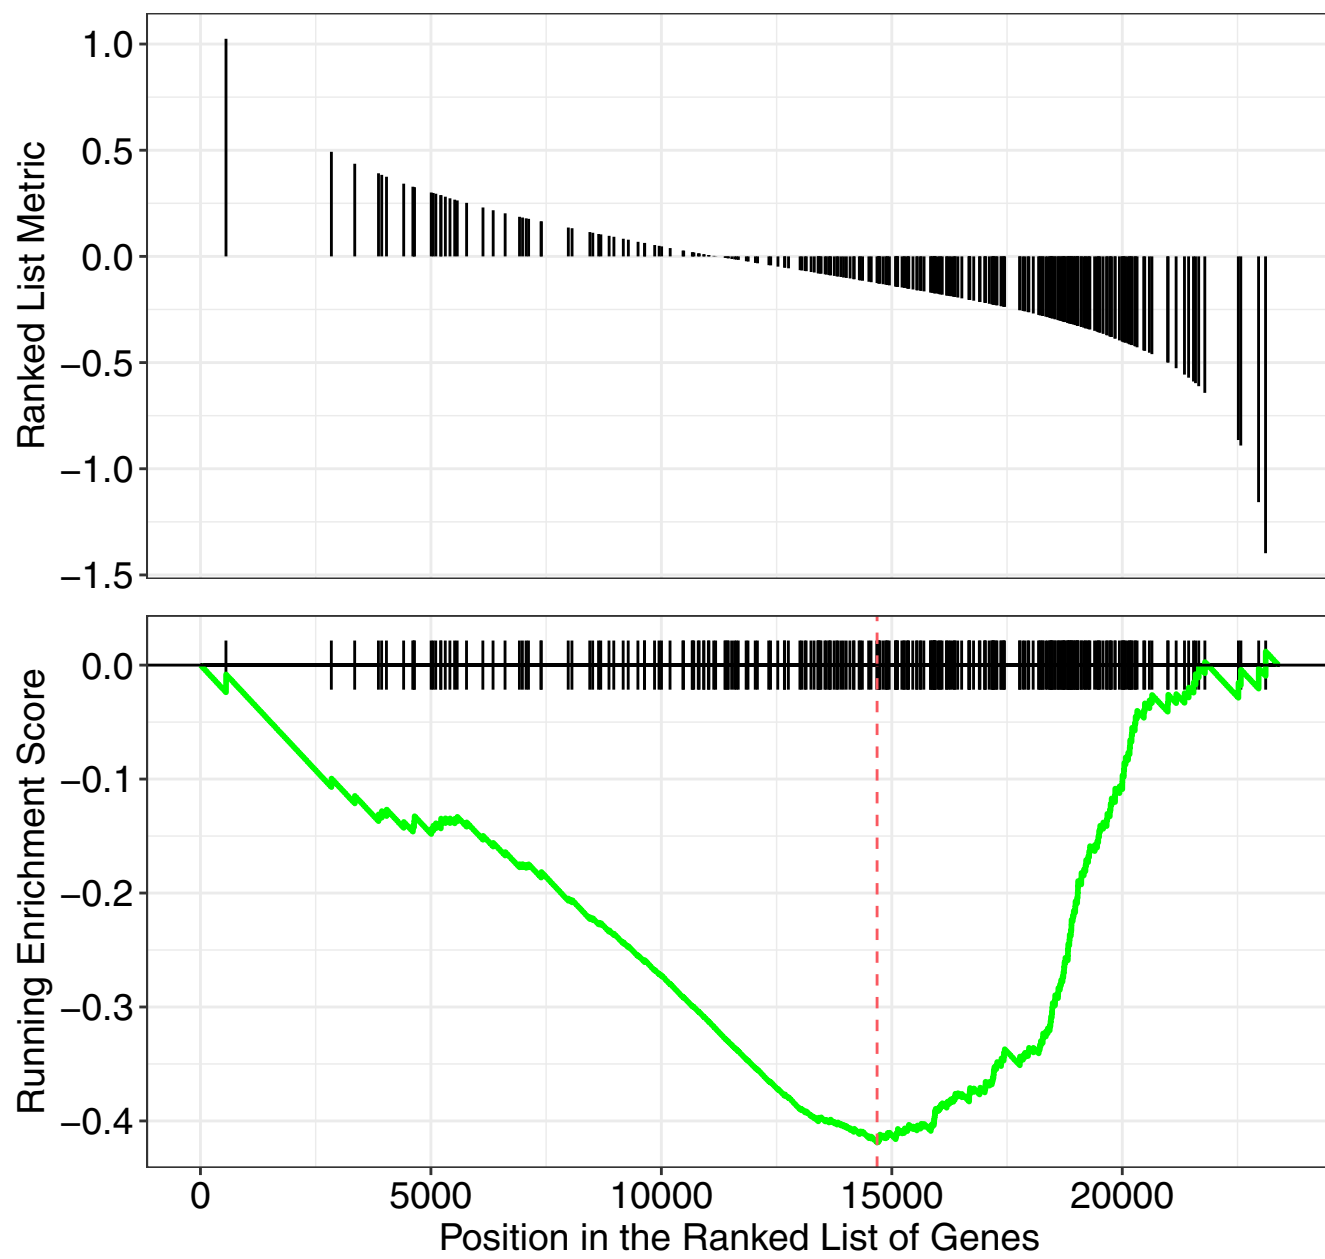

### small molecule catabolic process

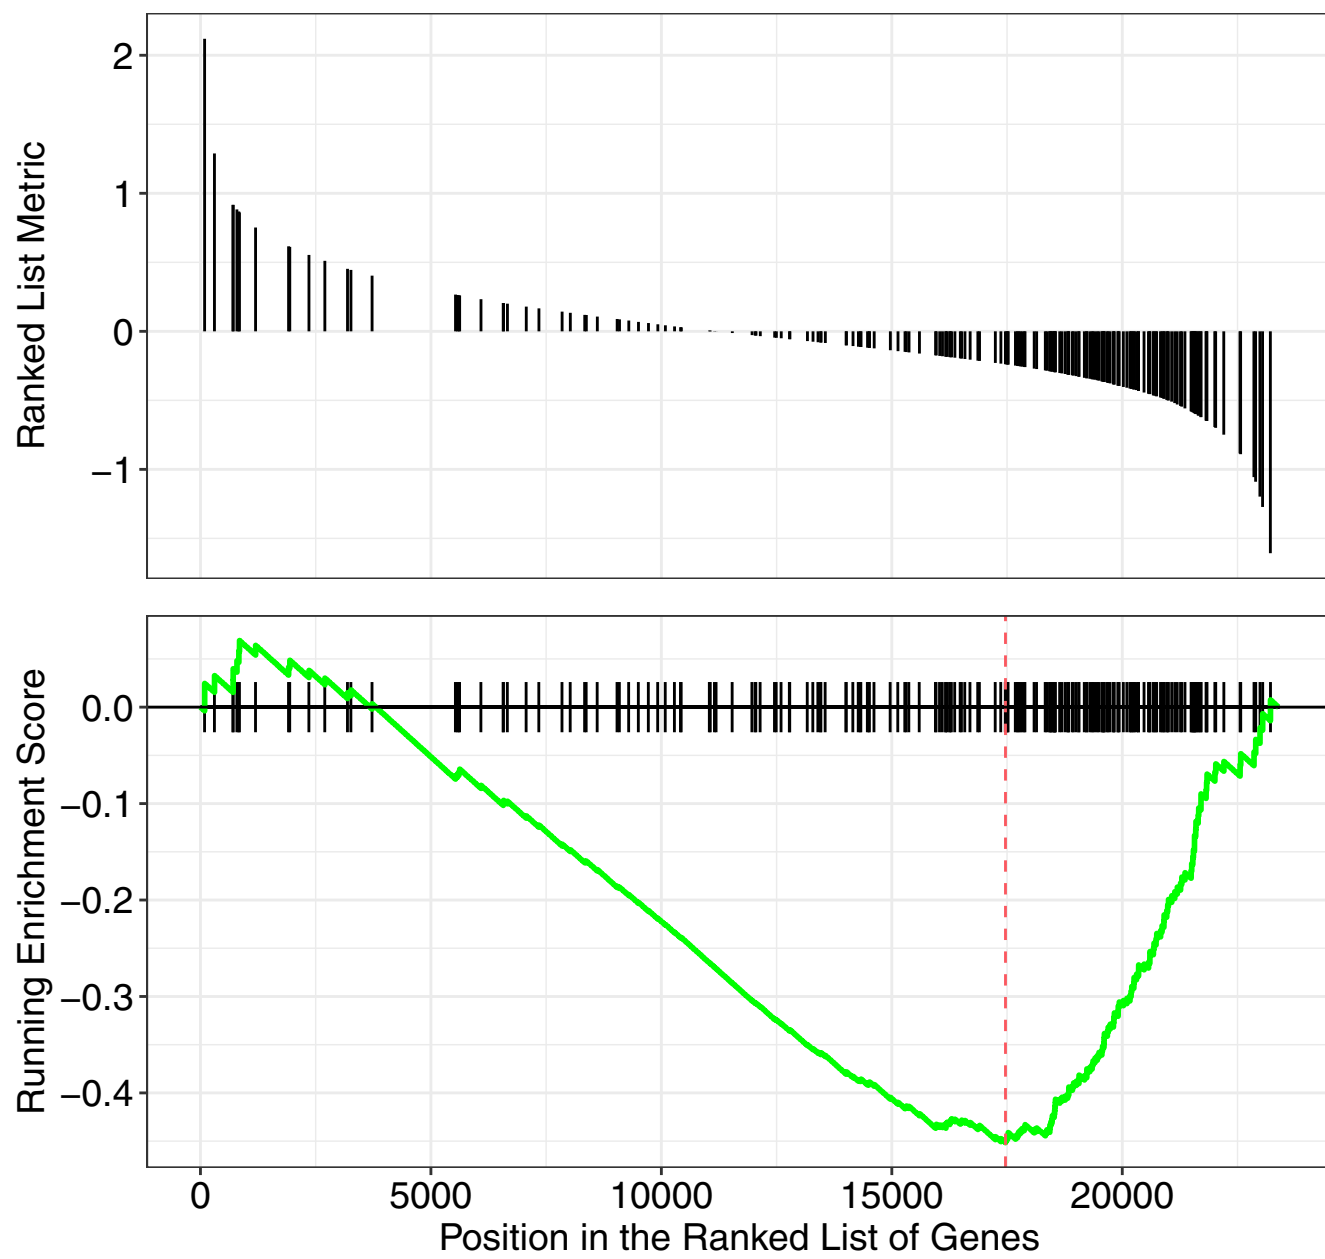

### organic acid catabolic process

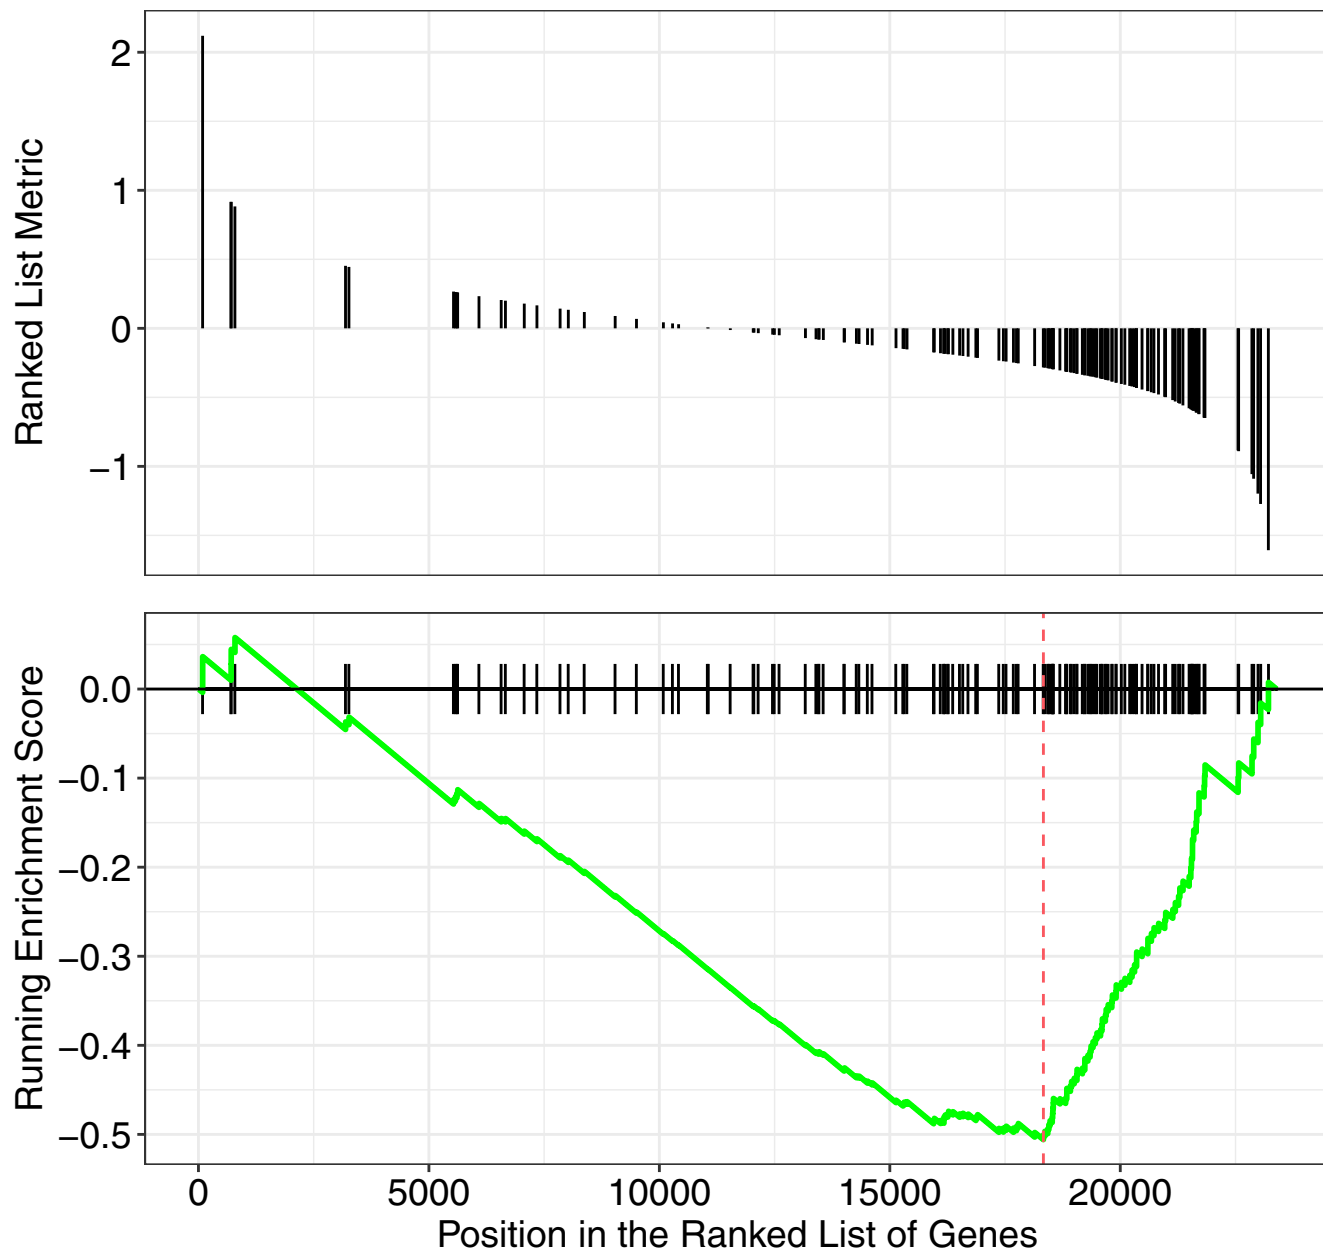

### endopeptidase activity

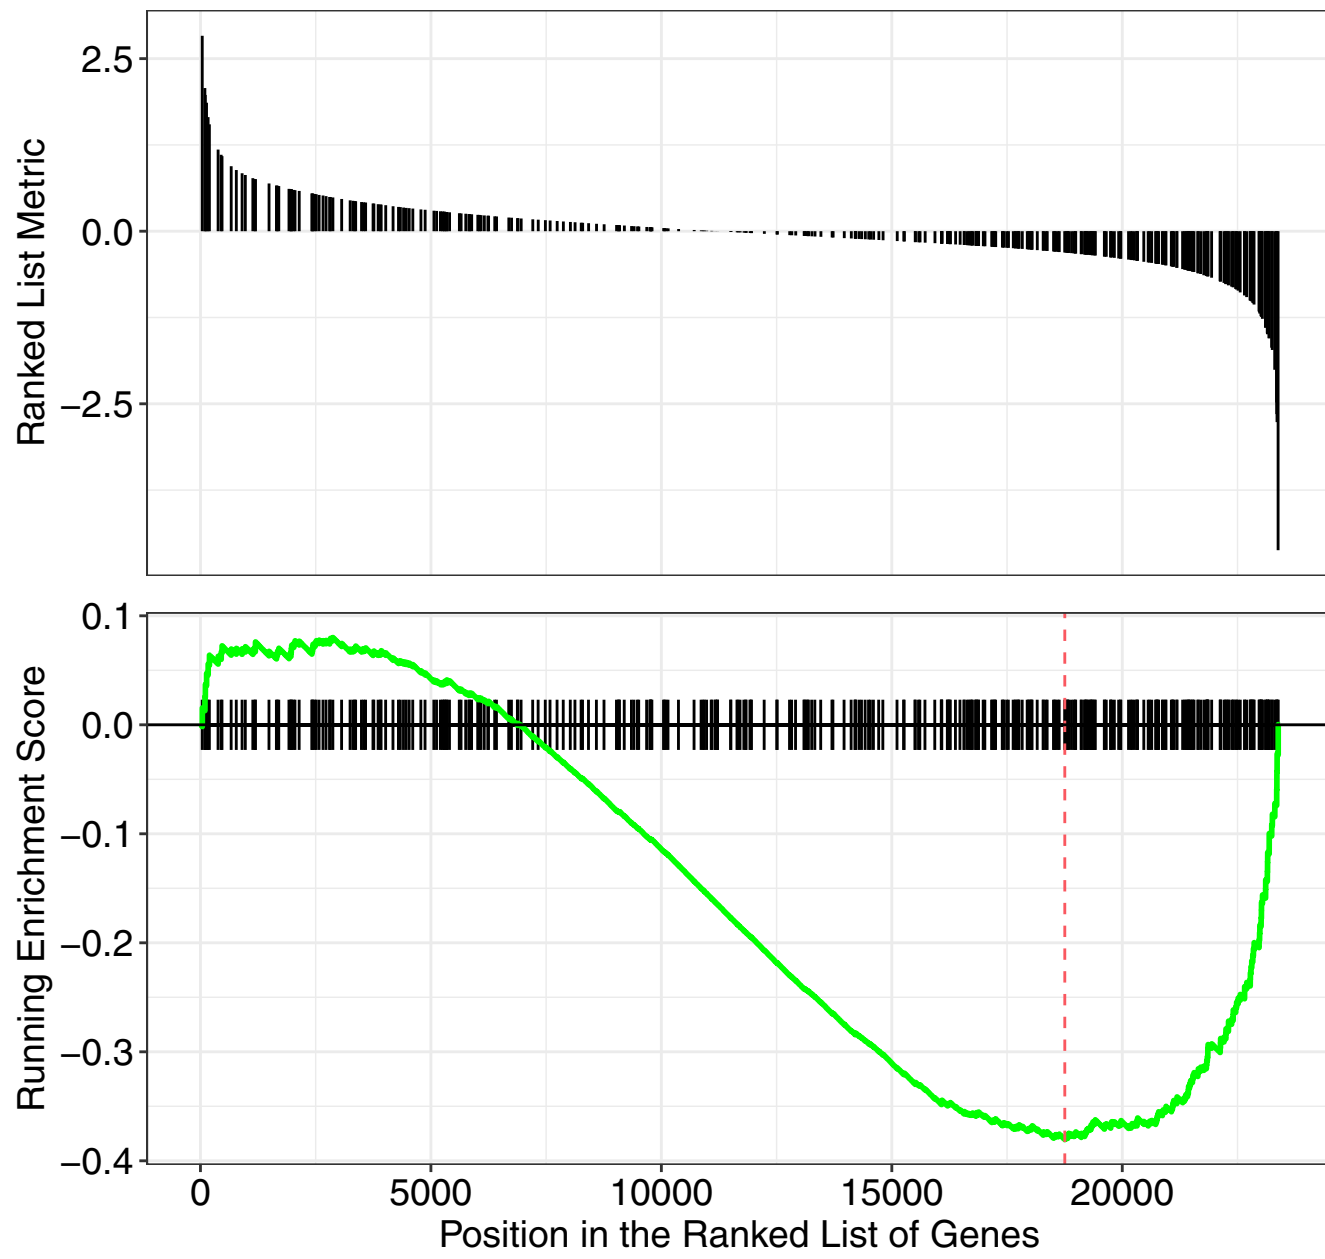

### monocarboxylic acid metabolic process

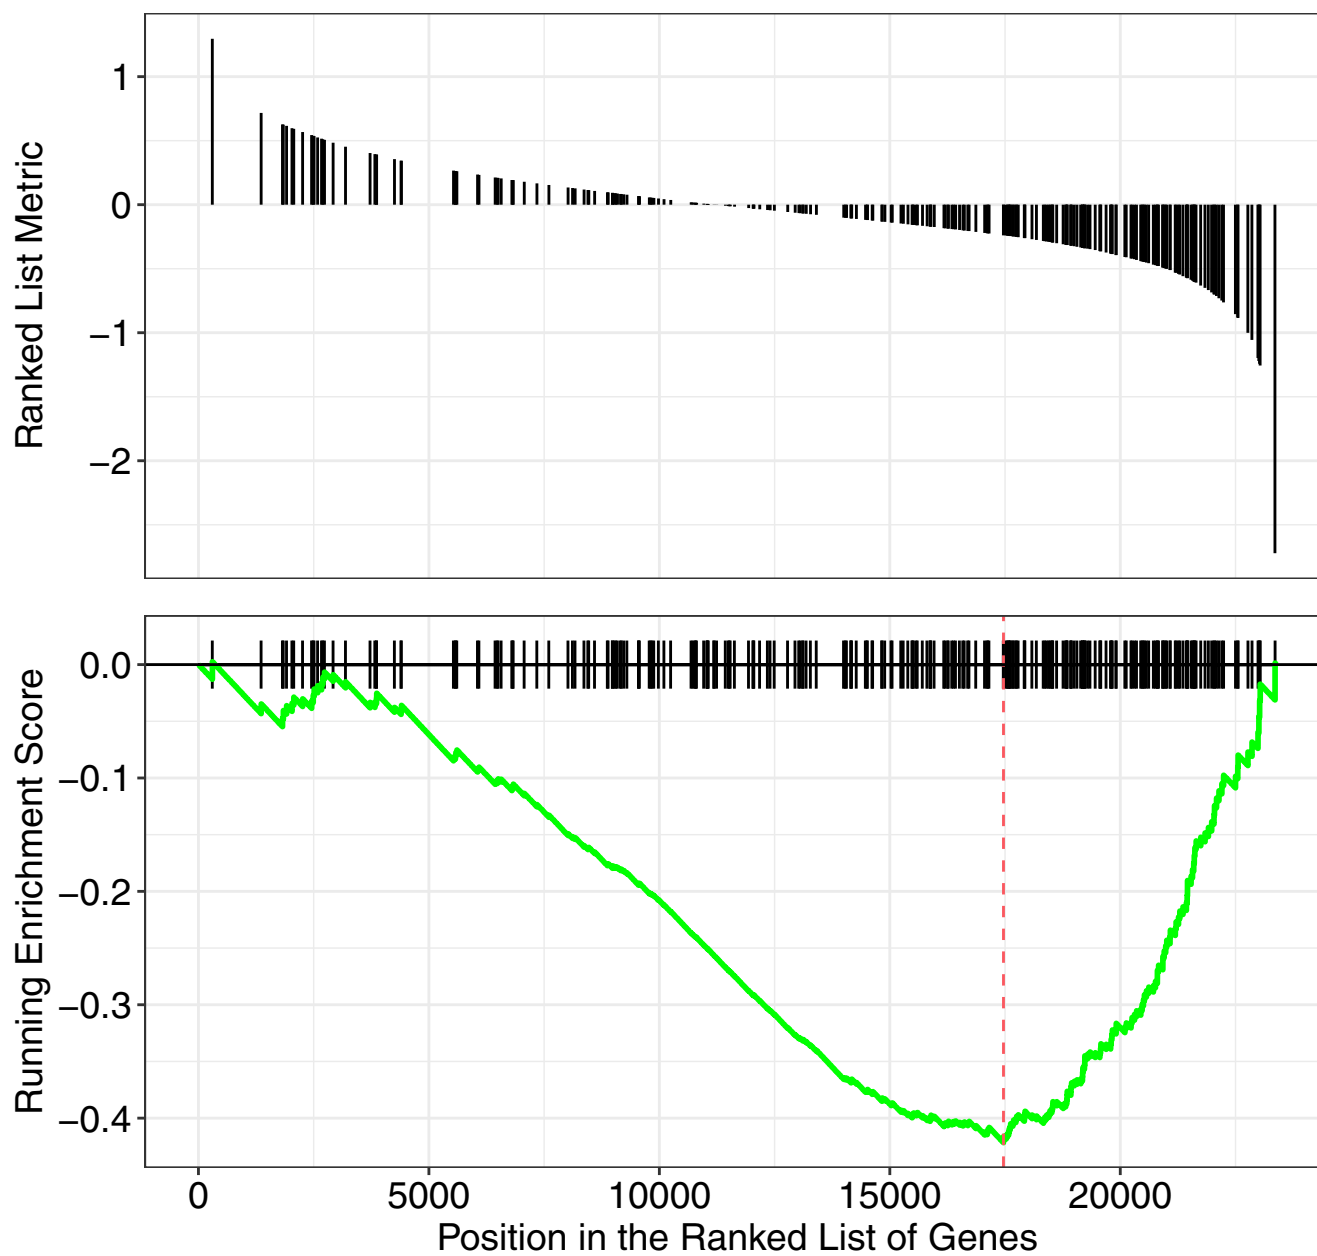

### structural constituent of ribosome

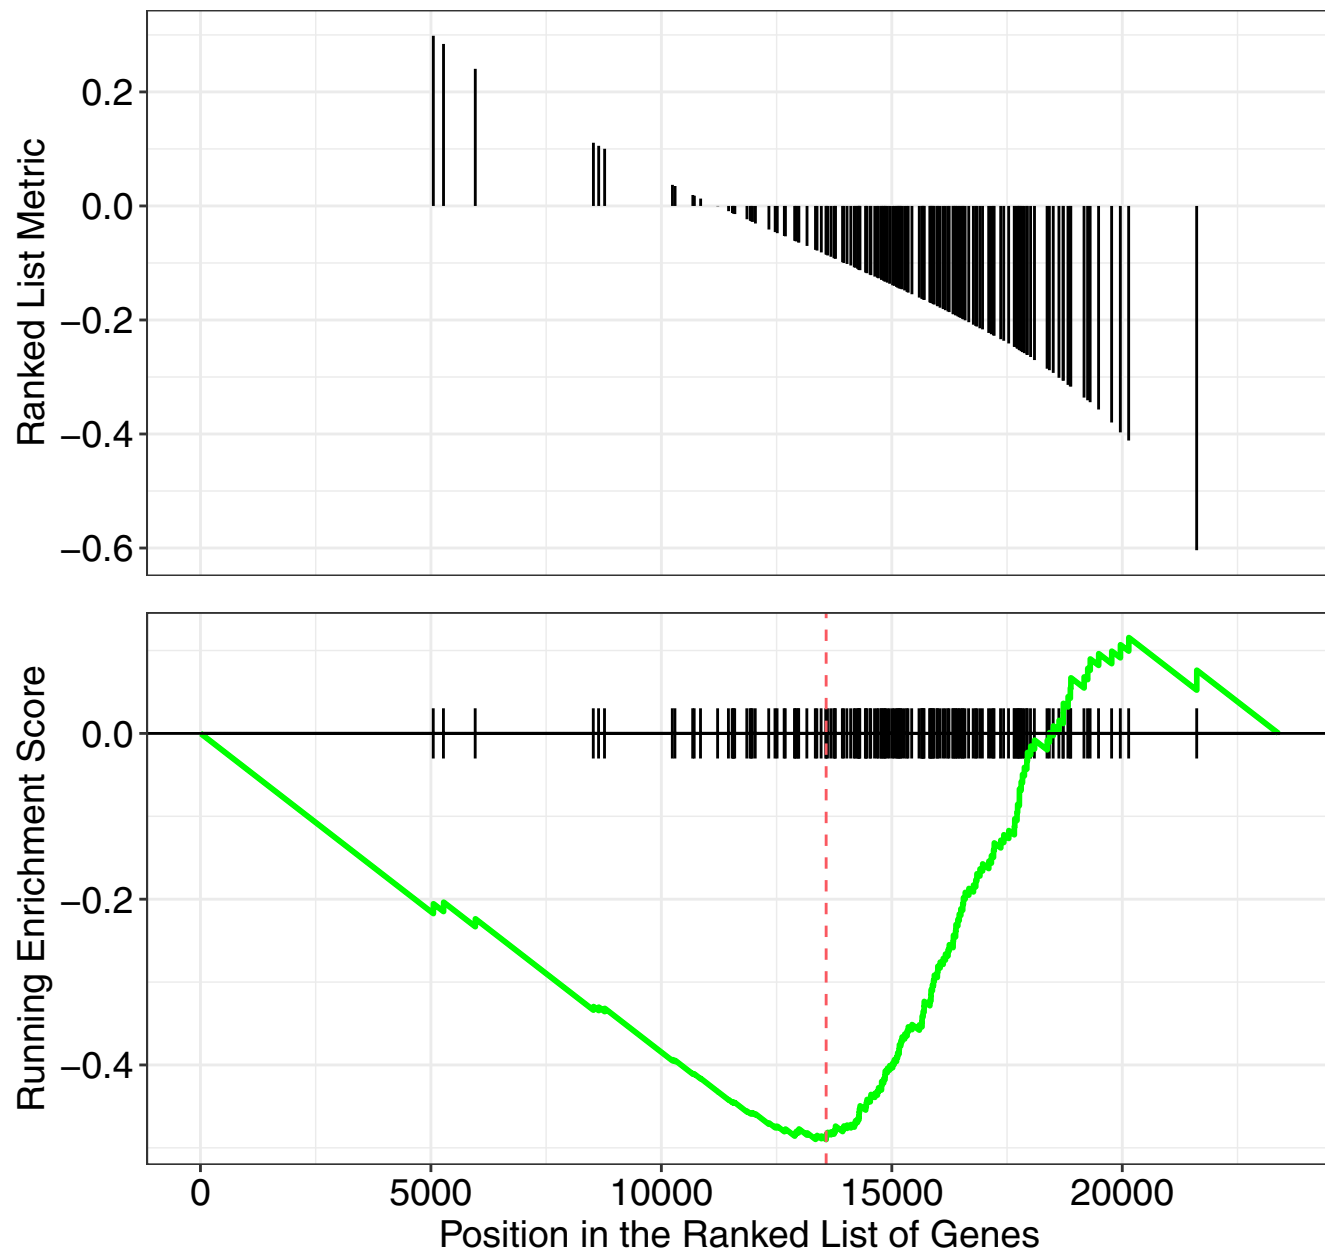

### carbohydrate metabolic process

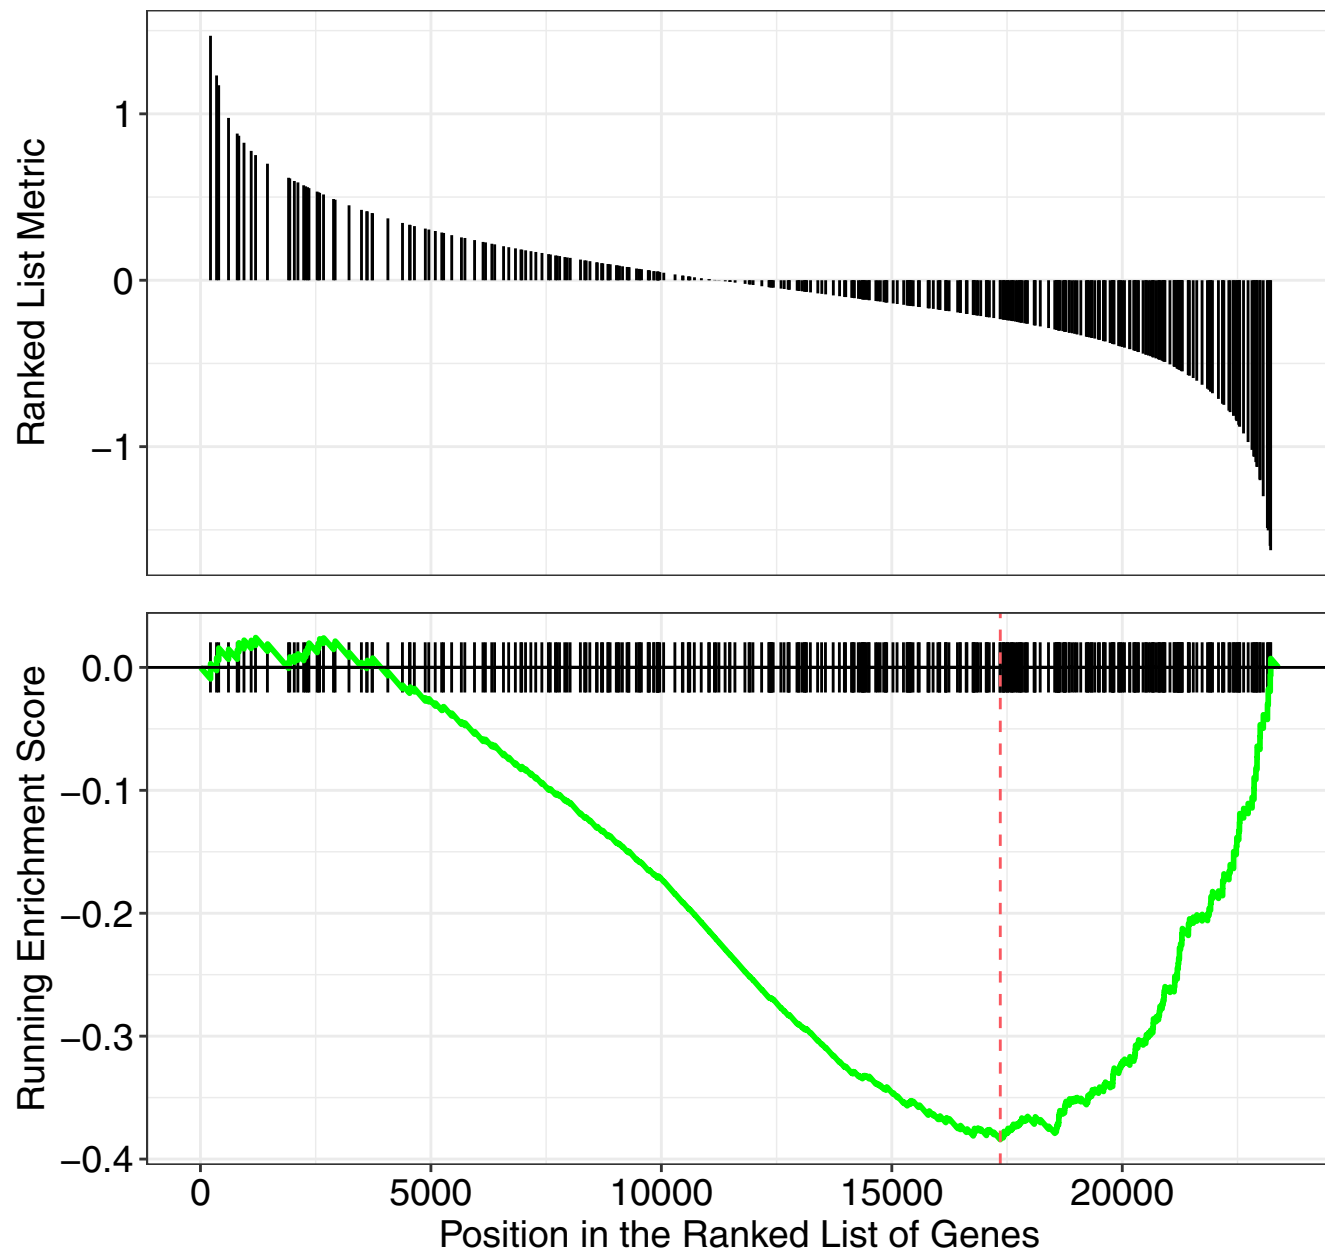

### ribosome

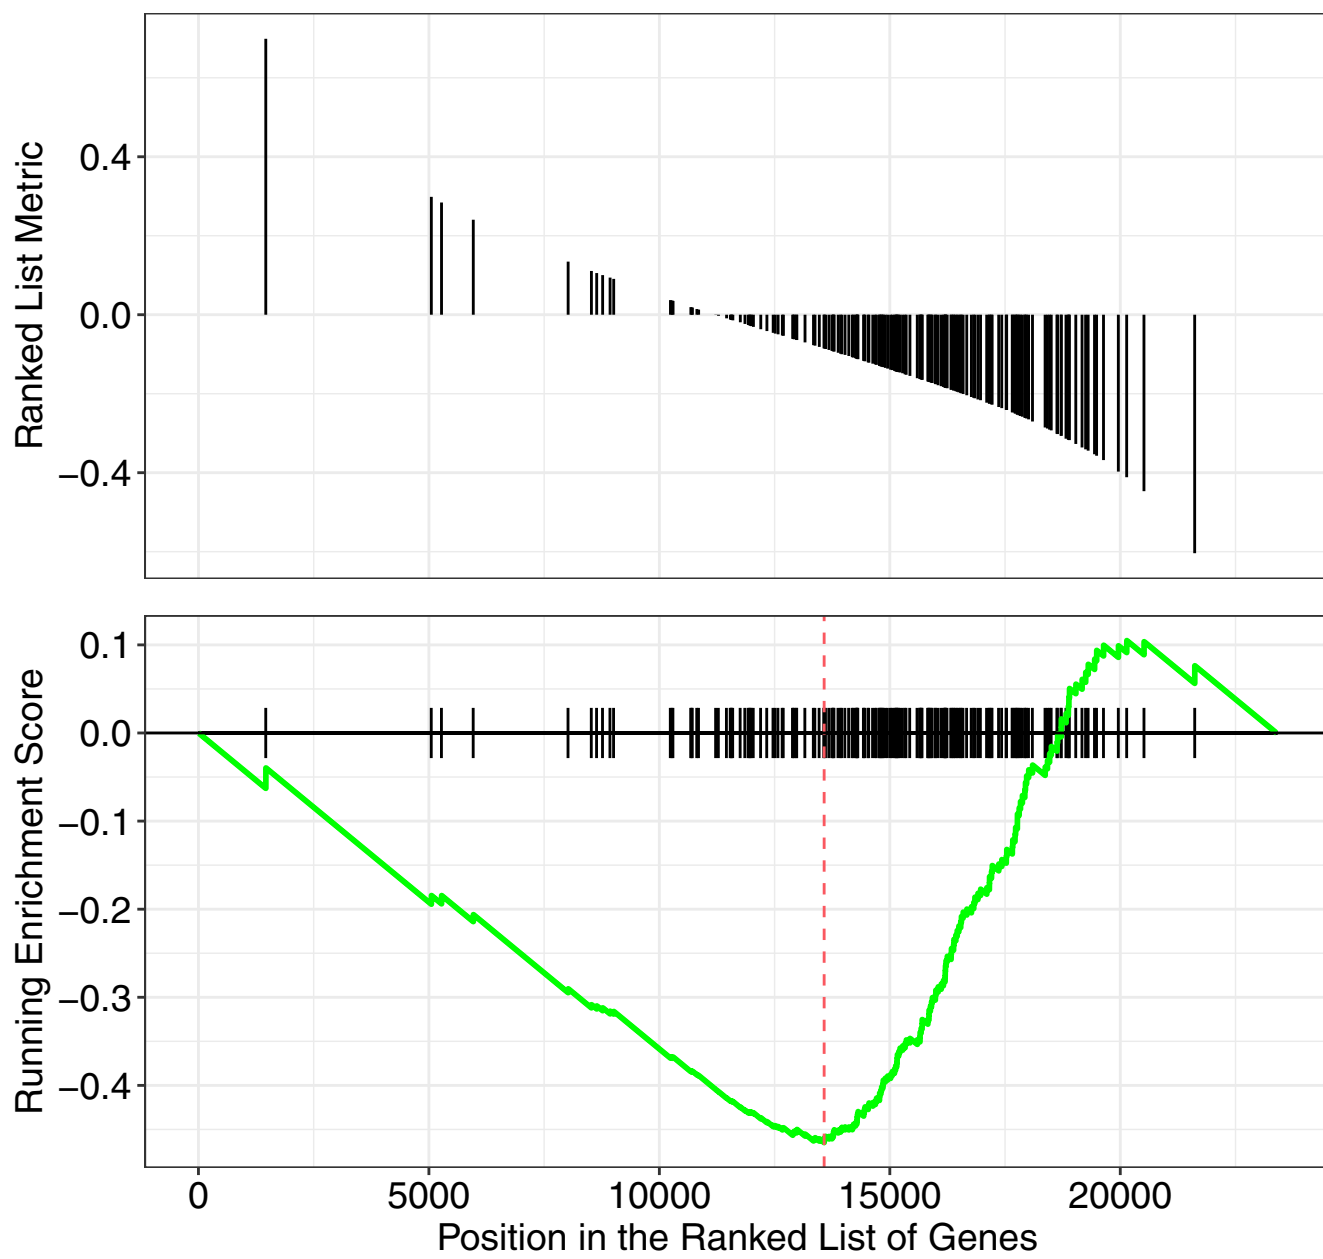



### transferase activity, transferring glycosyl groups

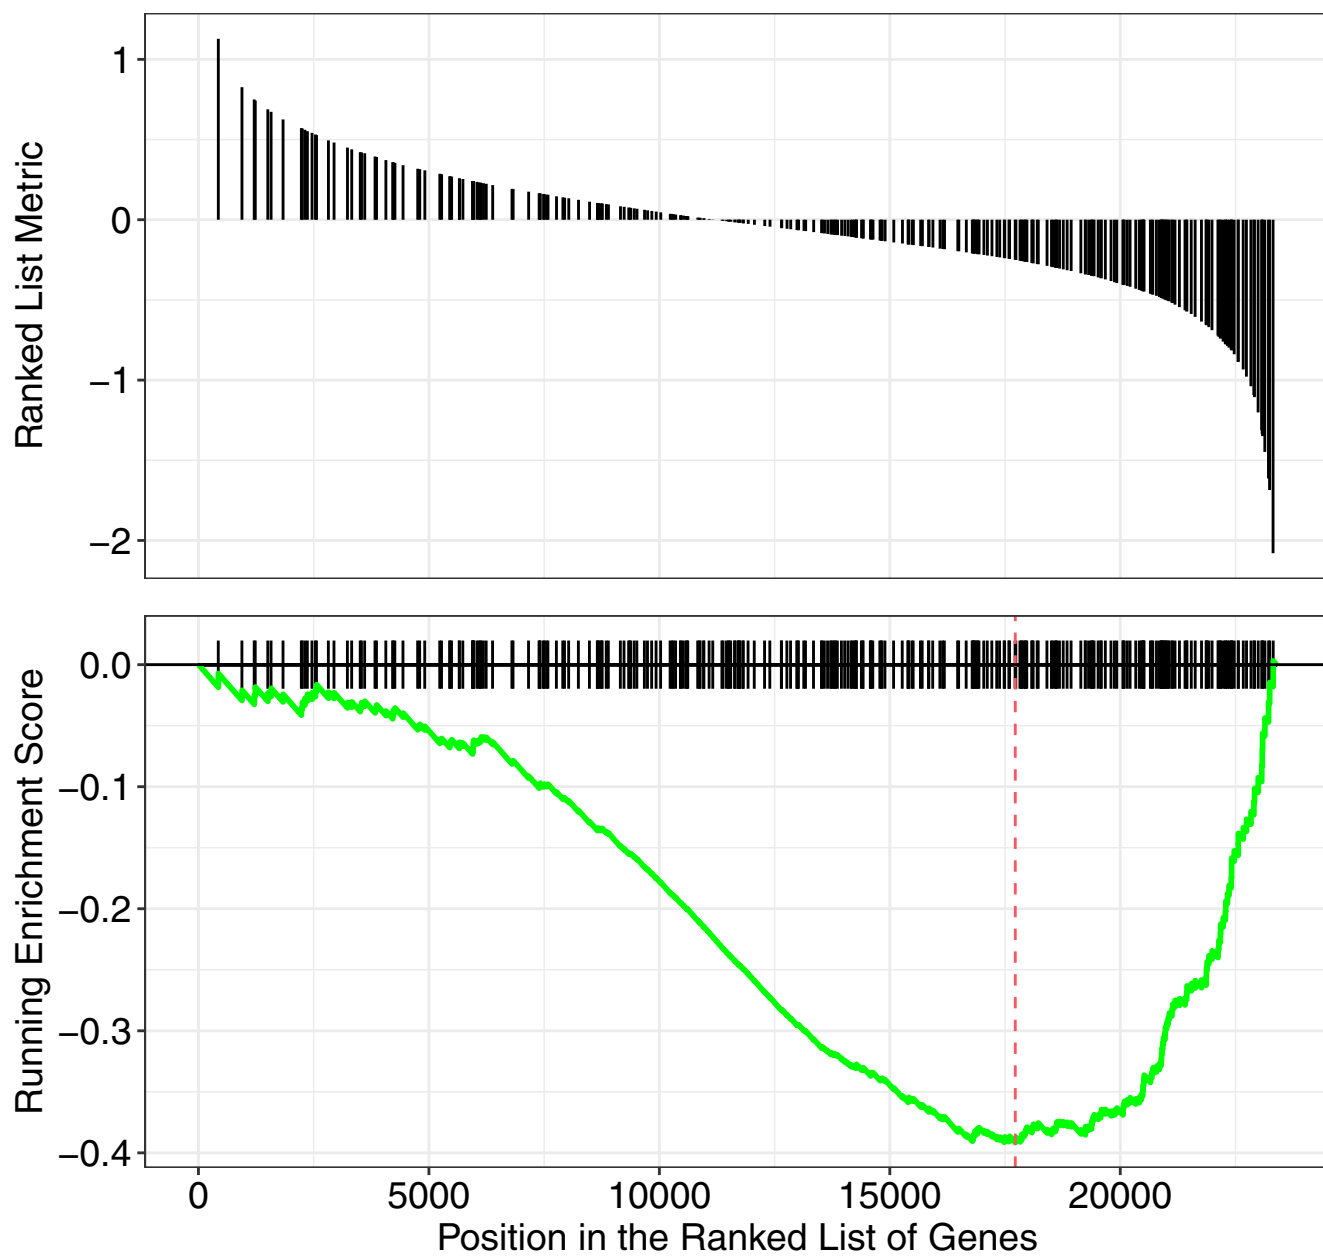

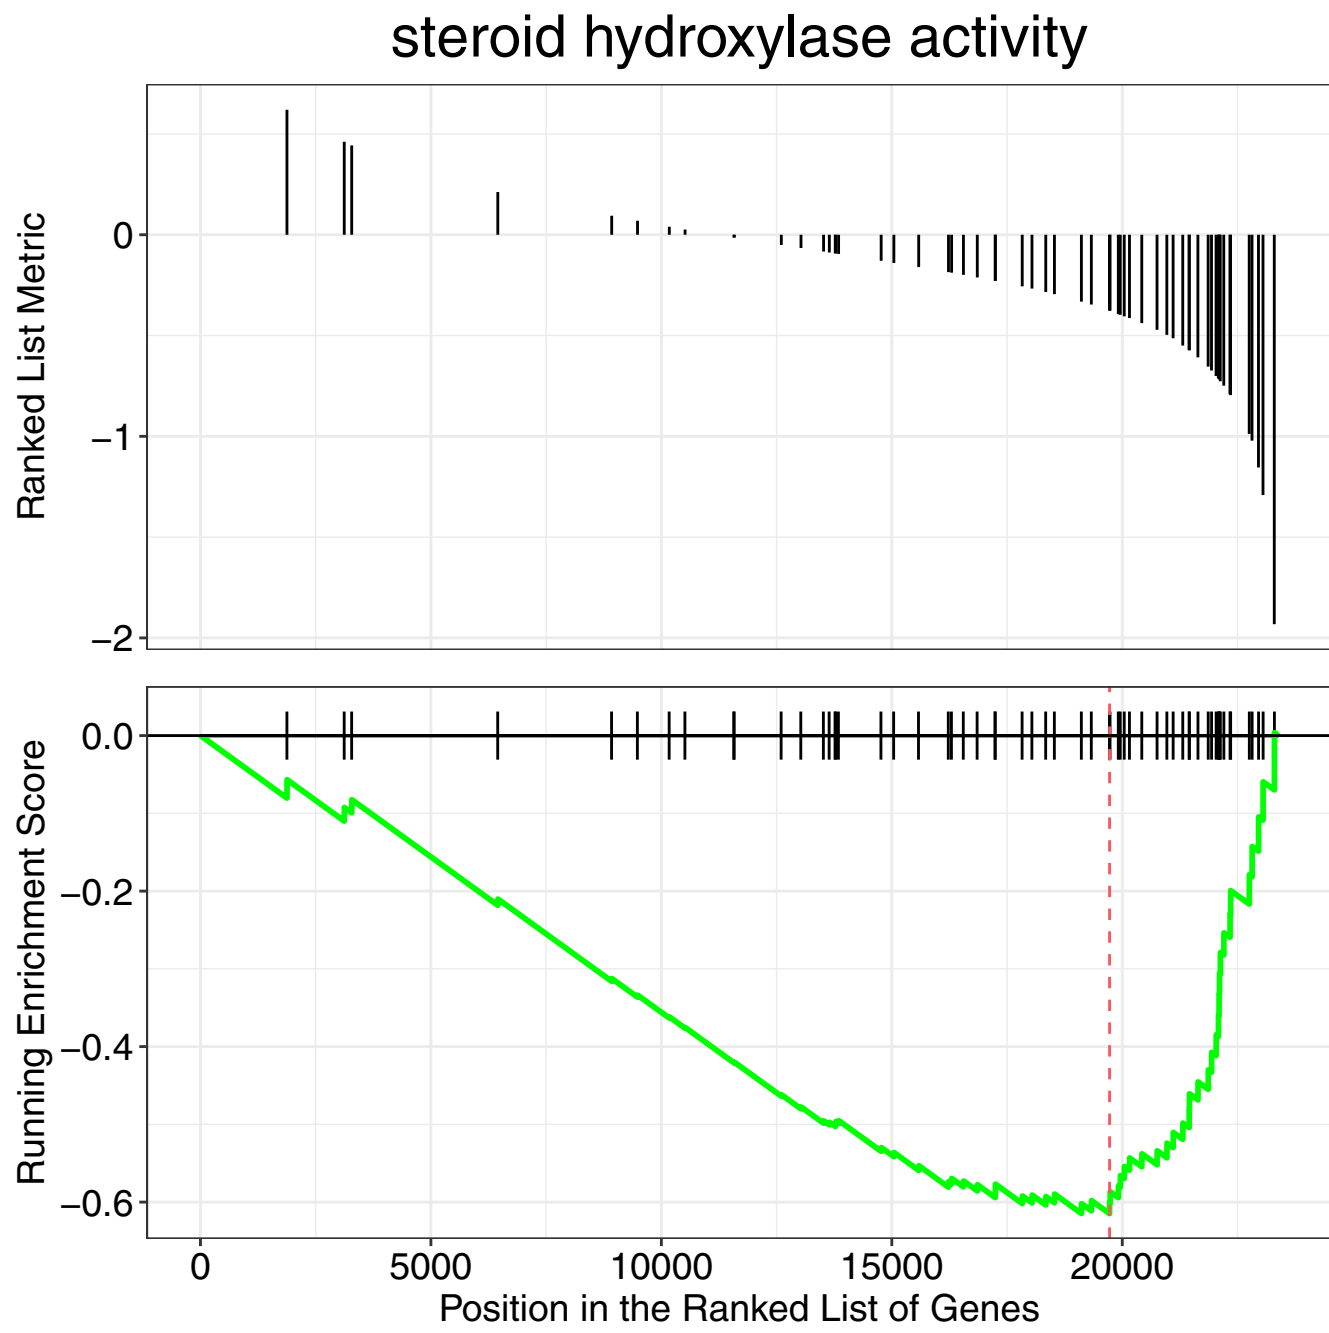

### ncRNA metabolic process

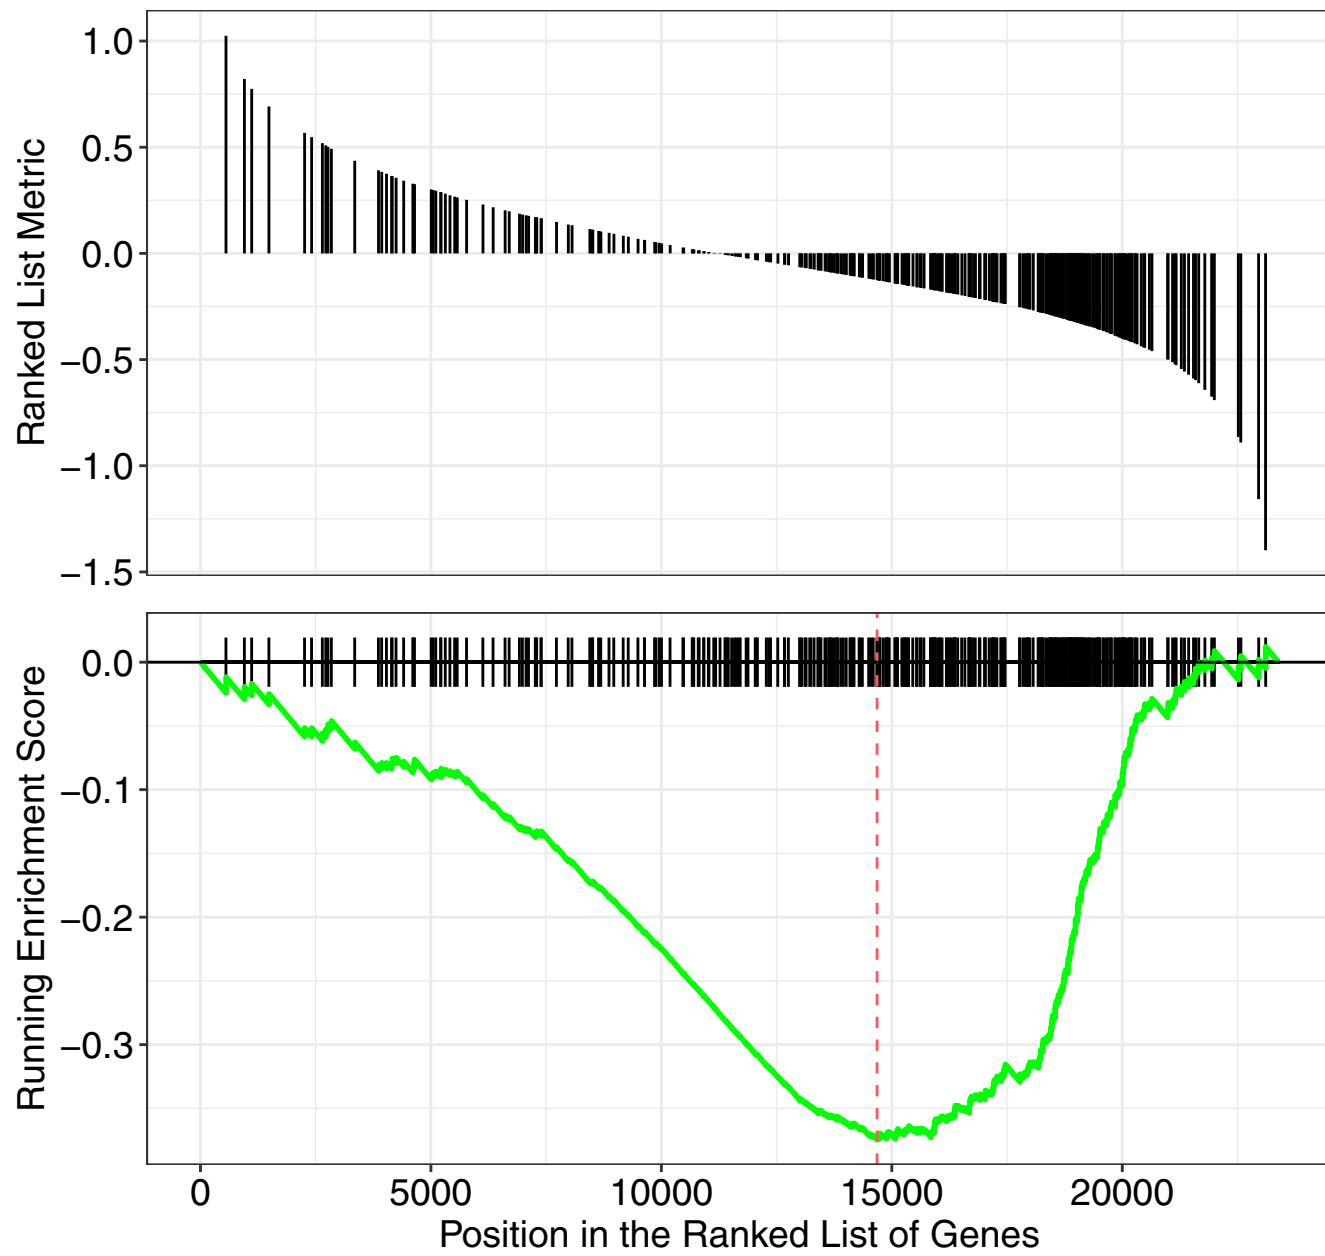

### ribosome biogenesis

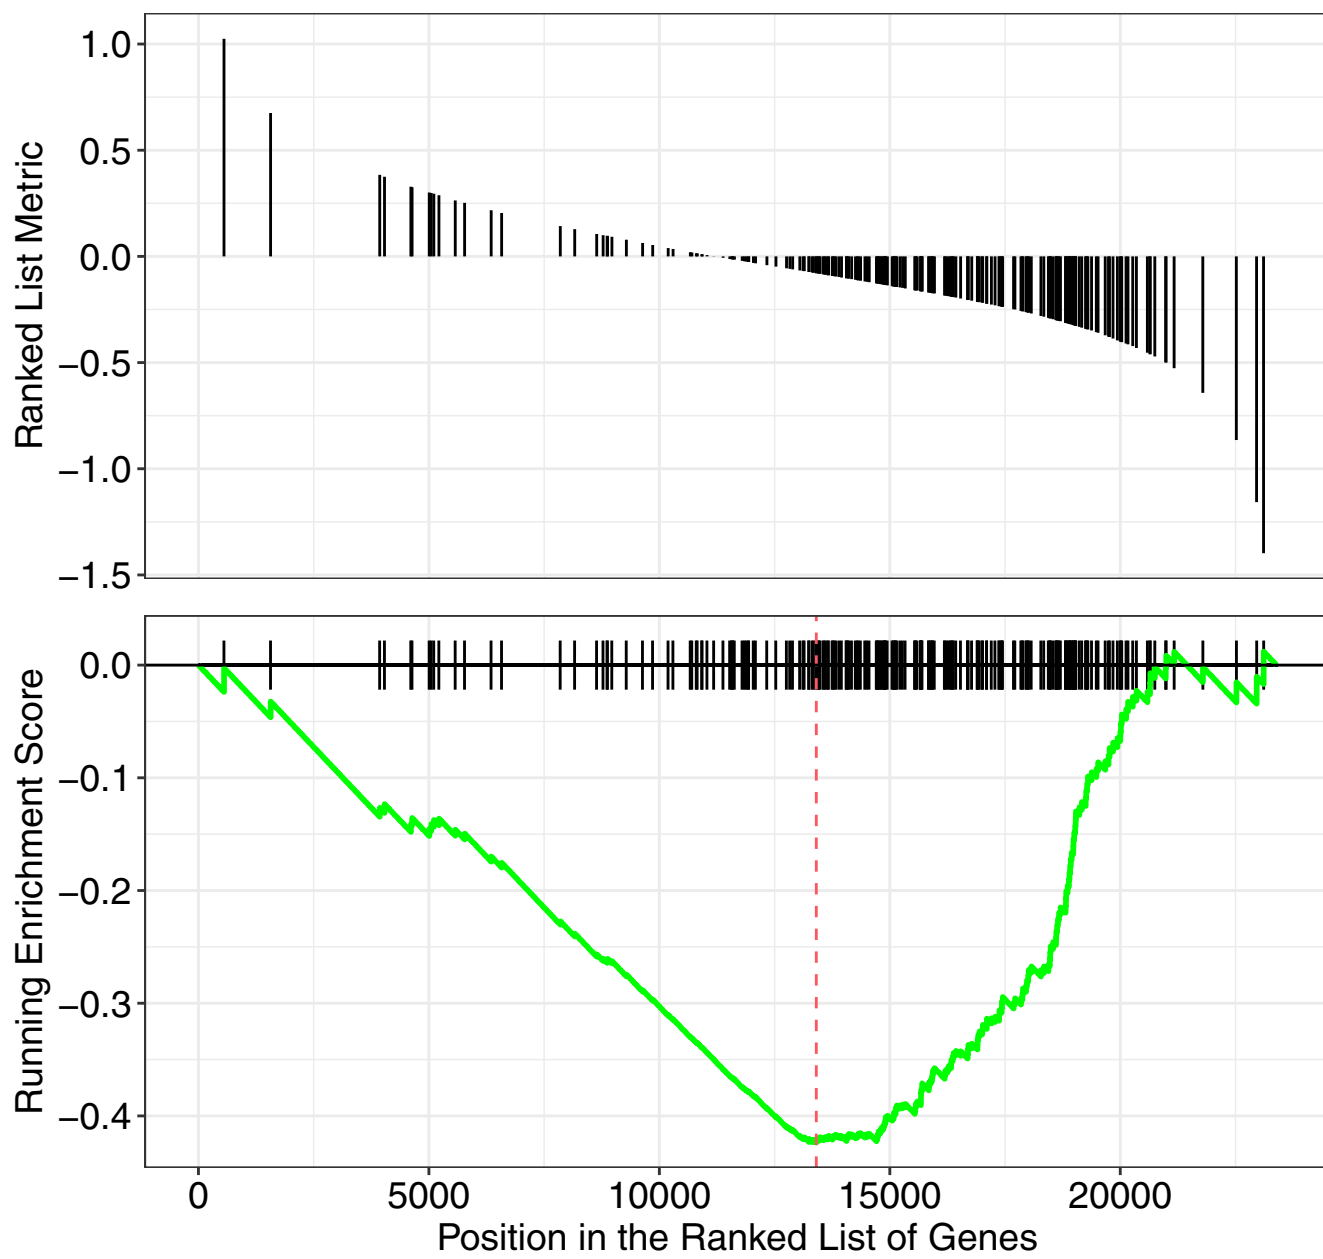

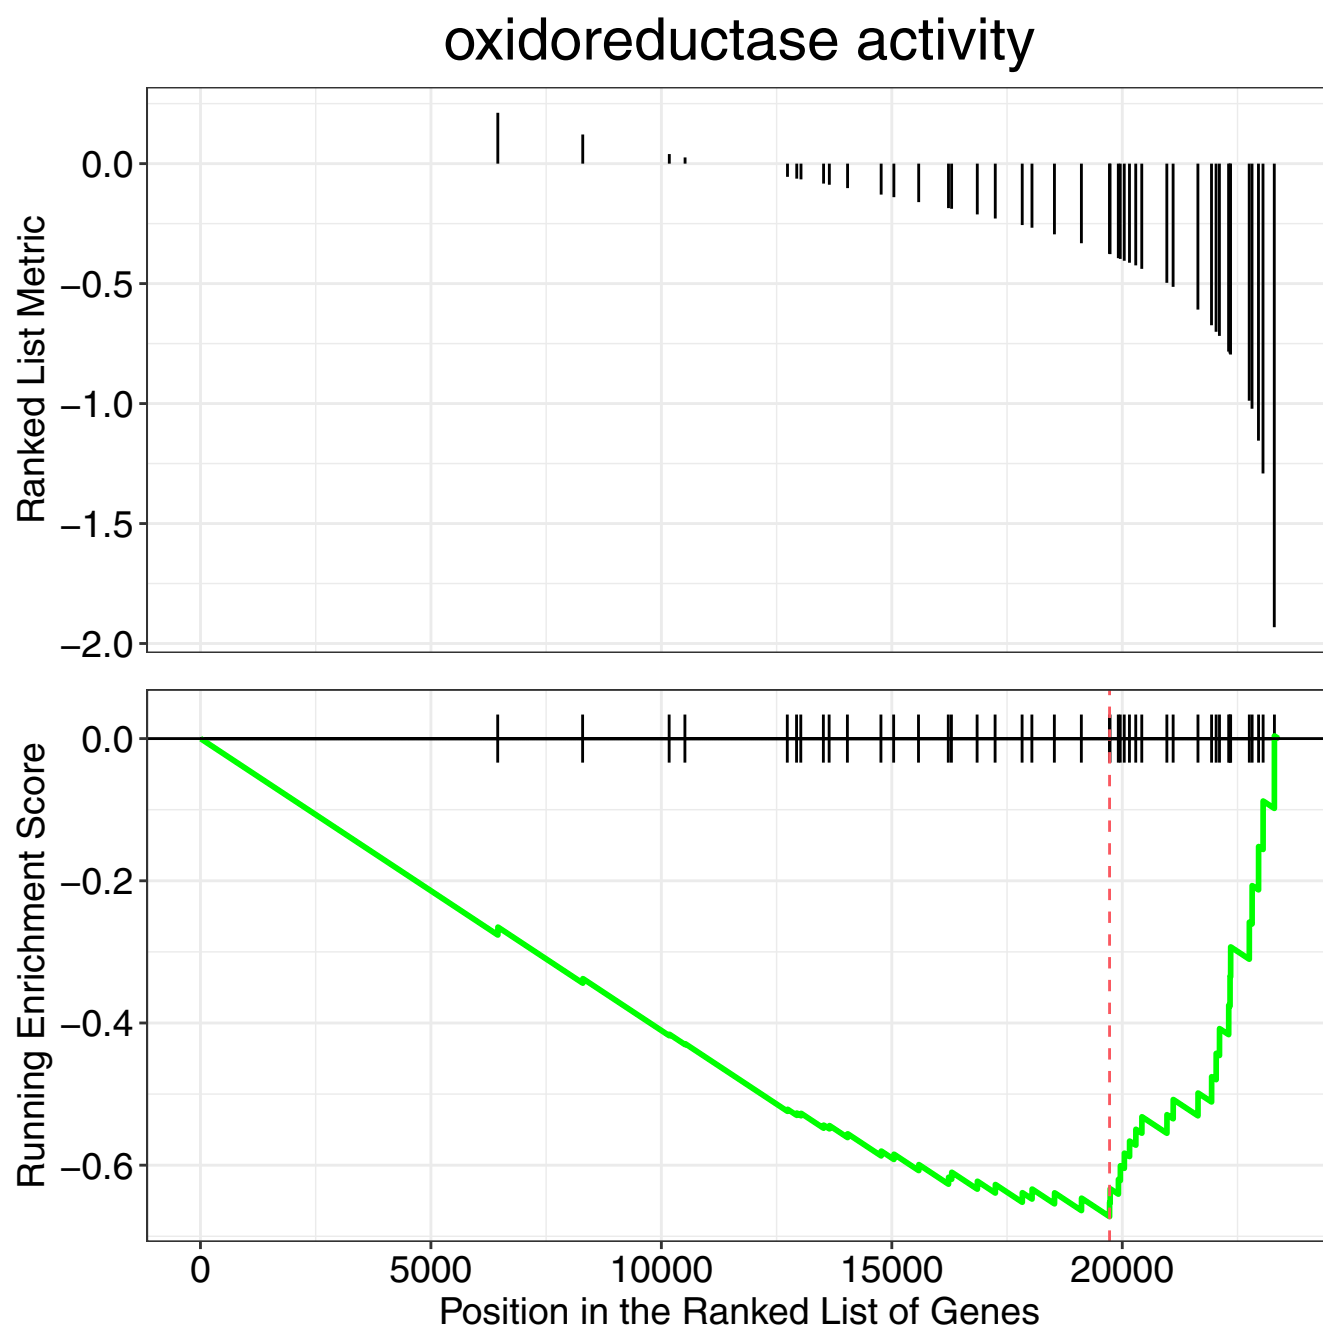

**Fig. S4. Enrichment plots of Gene set enrichment analysis (GSEA) of differentially expressed genes in *alx1;alx3* mutants.** Running score plot and pre-ranked list of top 25 suppressed GSEA terms shown in Figure 5C.

### transcription coregulator activity

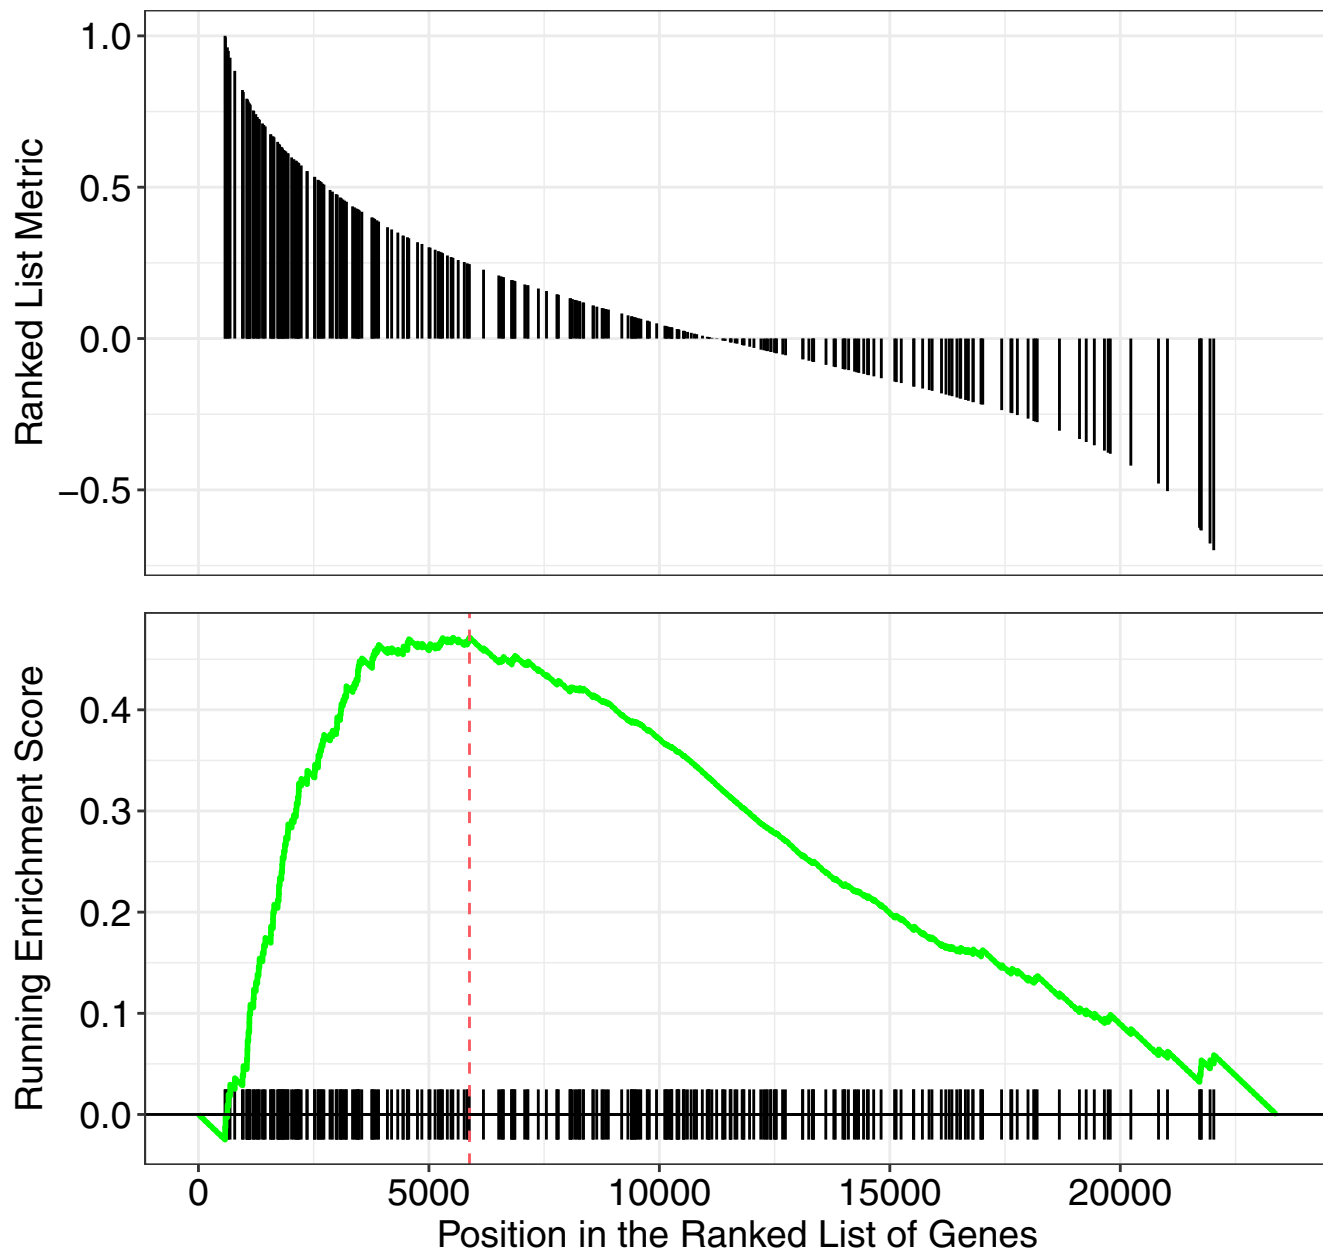

### brain development

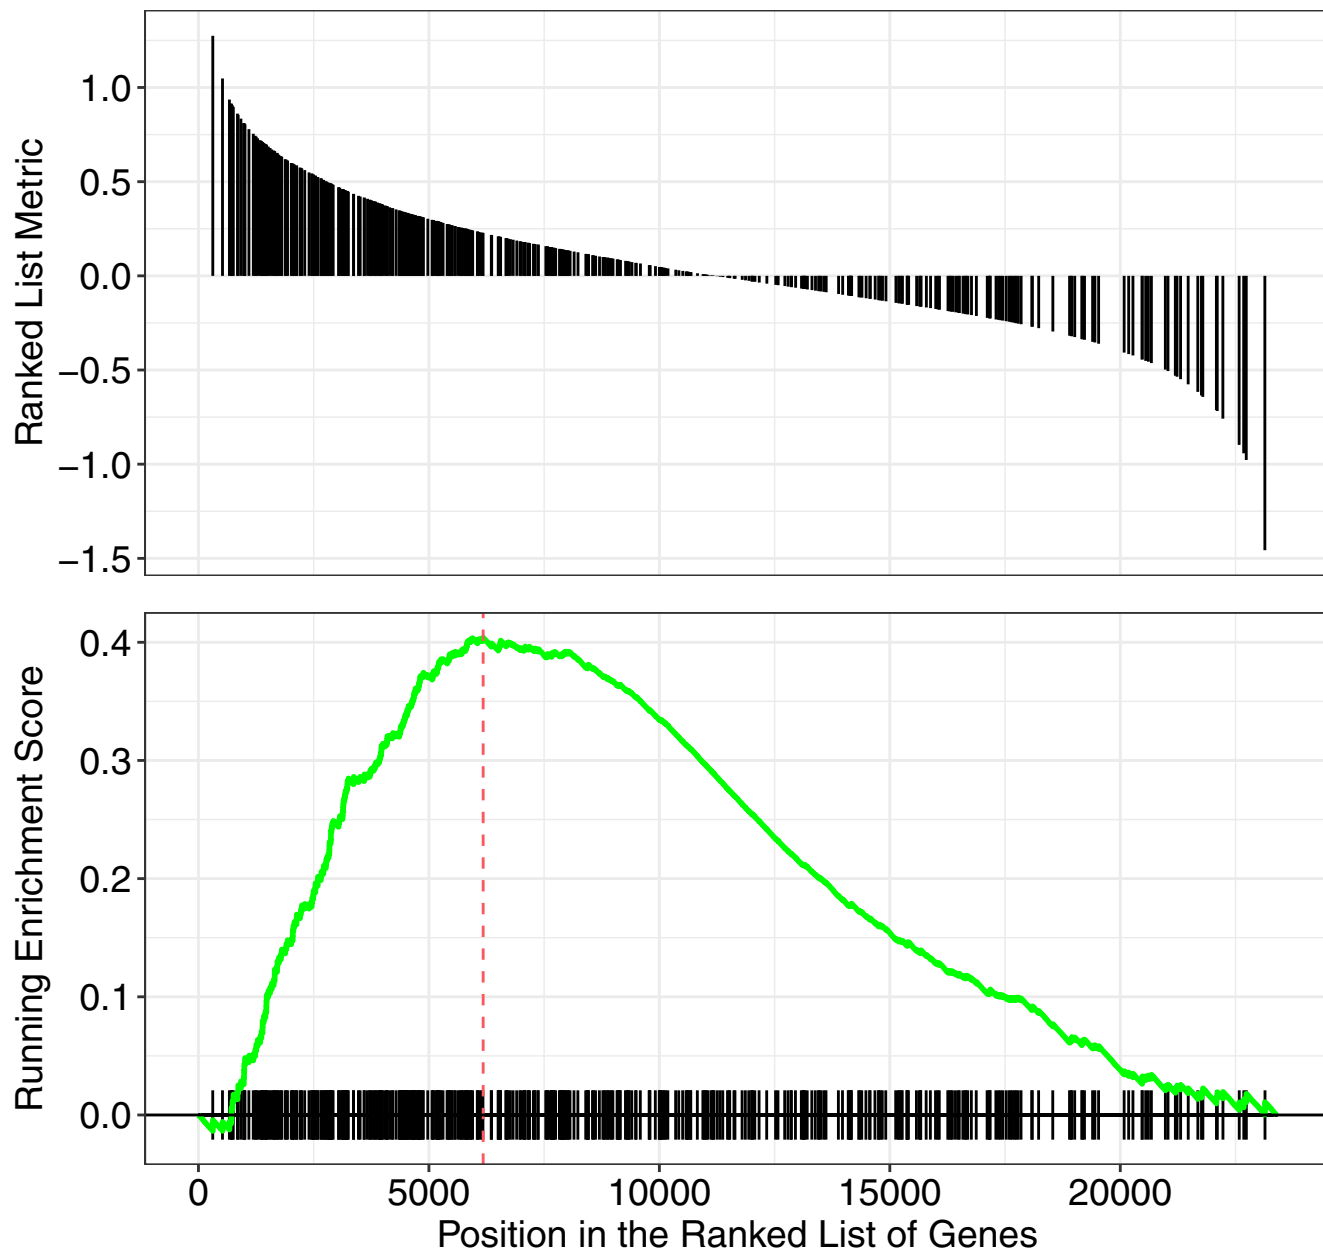

## head development

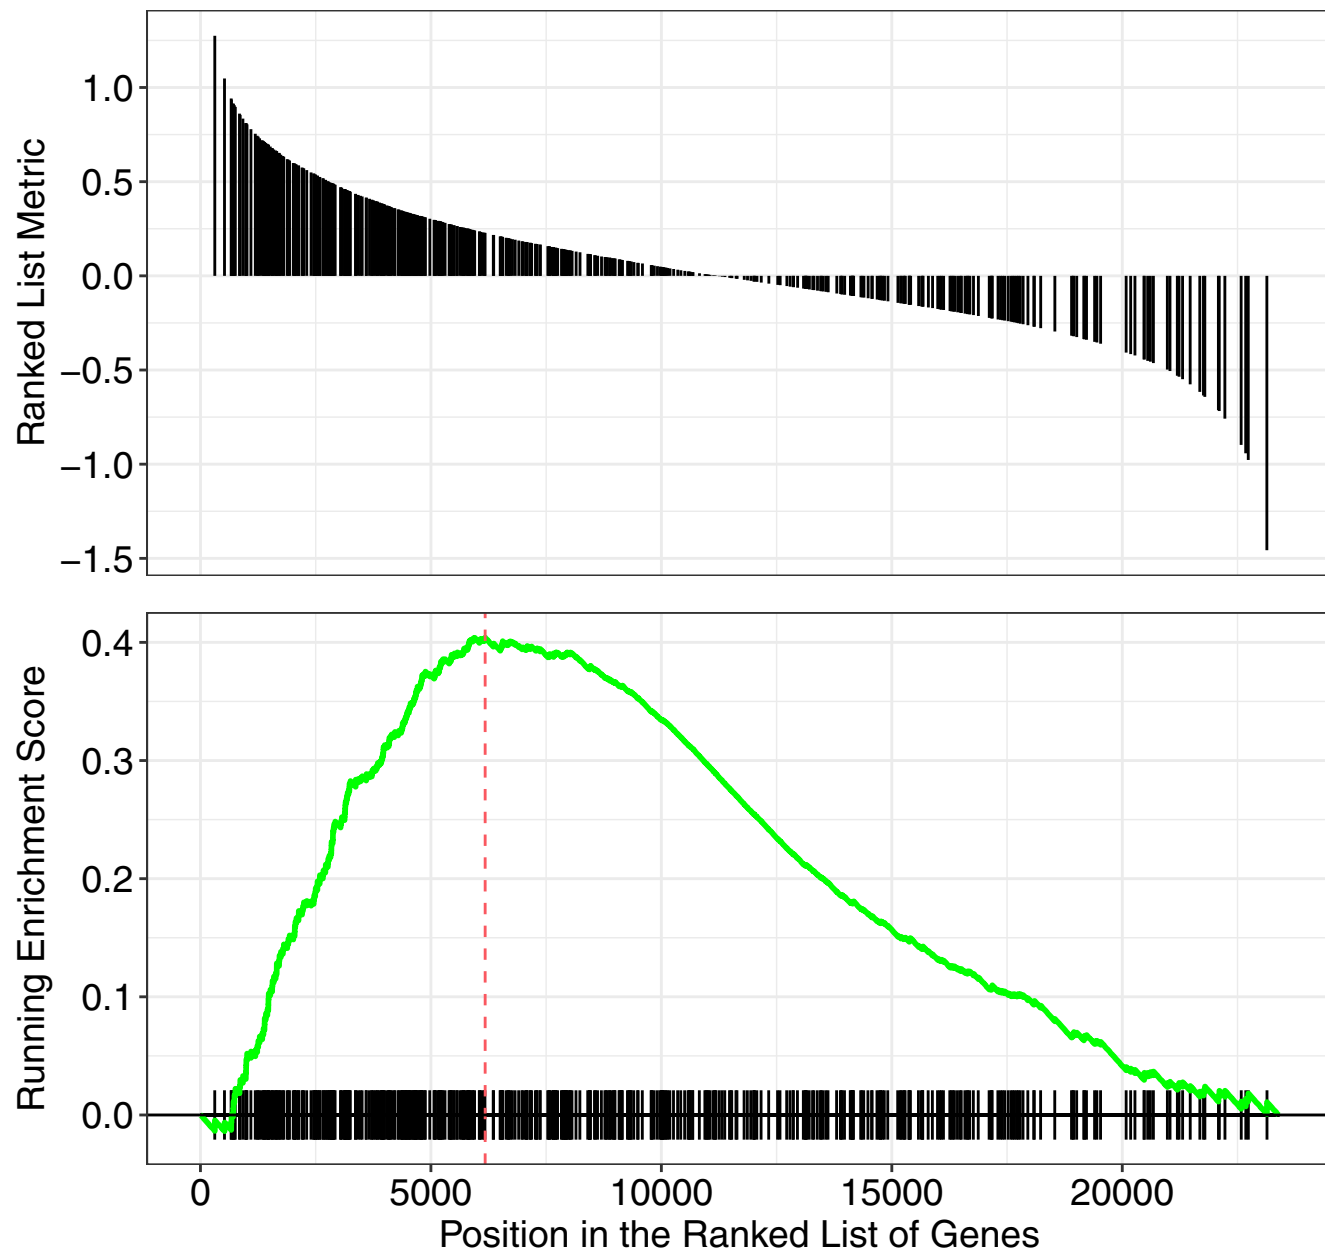



### transcription regulator complex

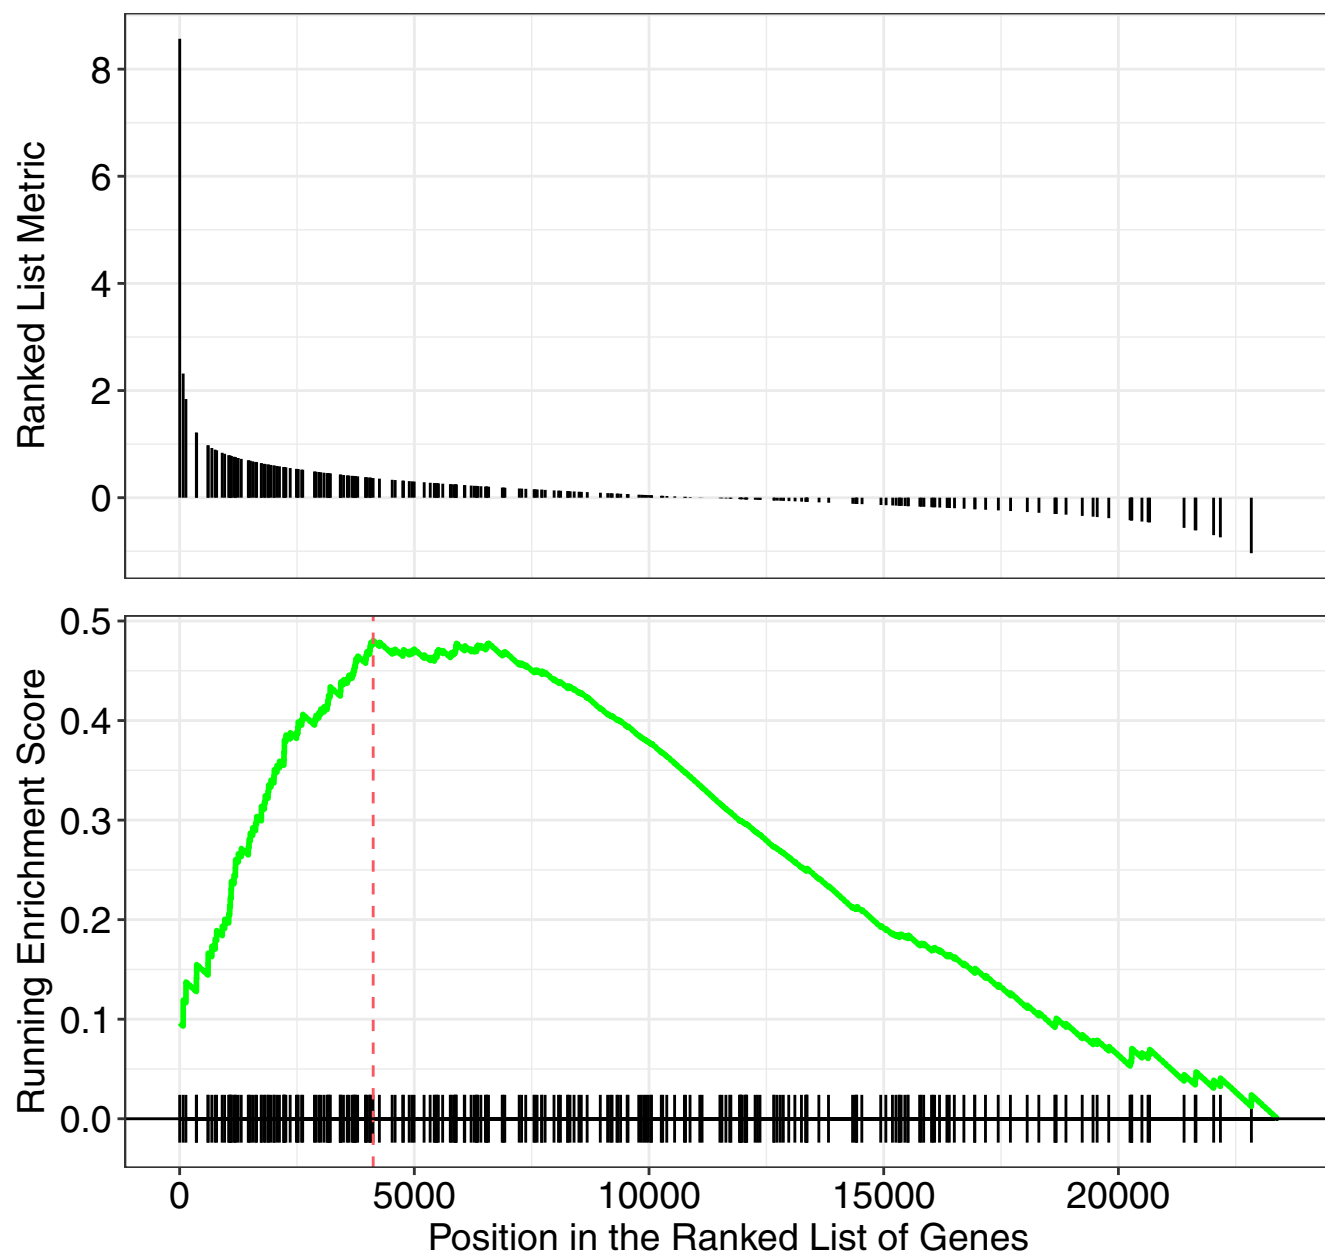

### cell projection morphogenesis

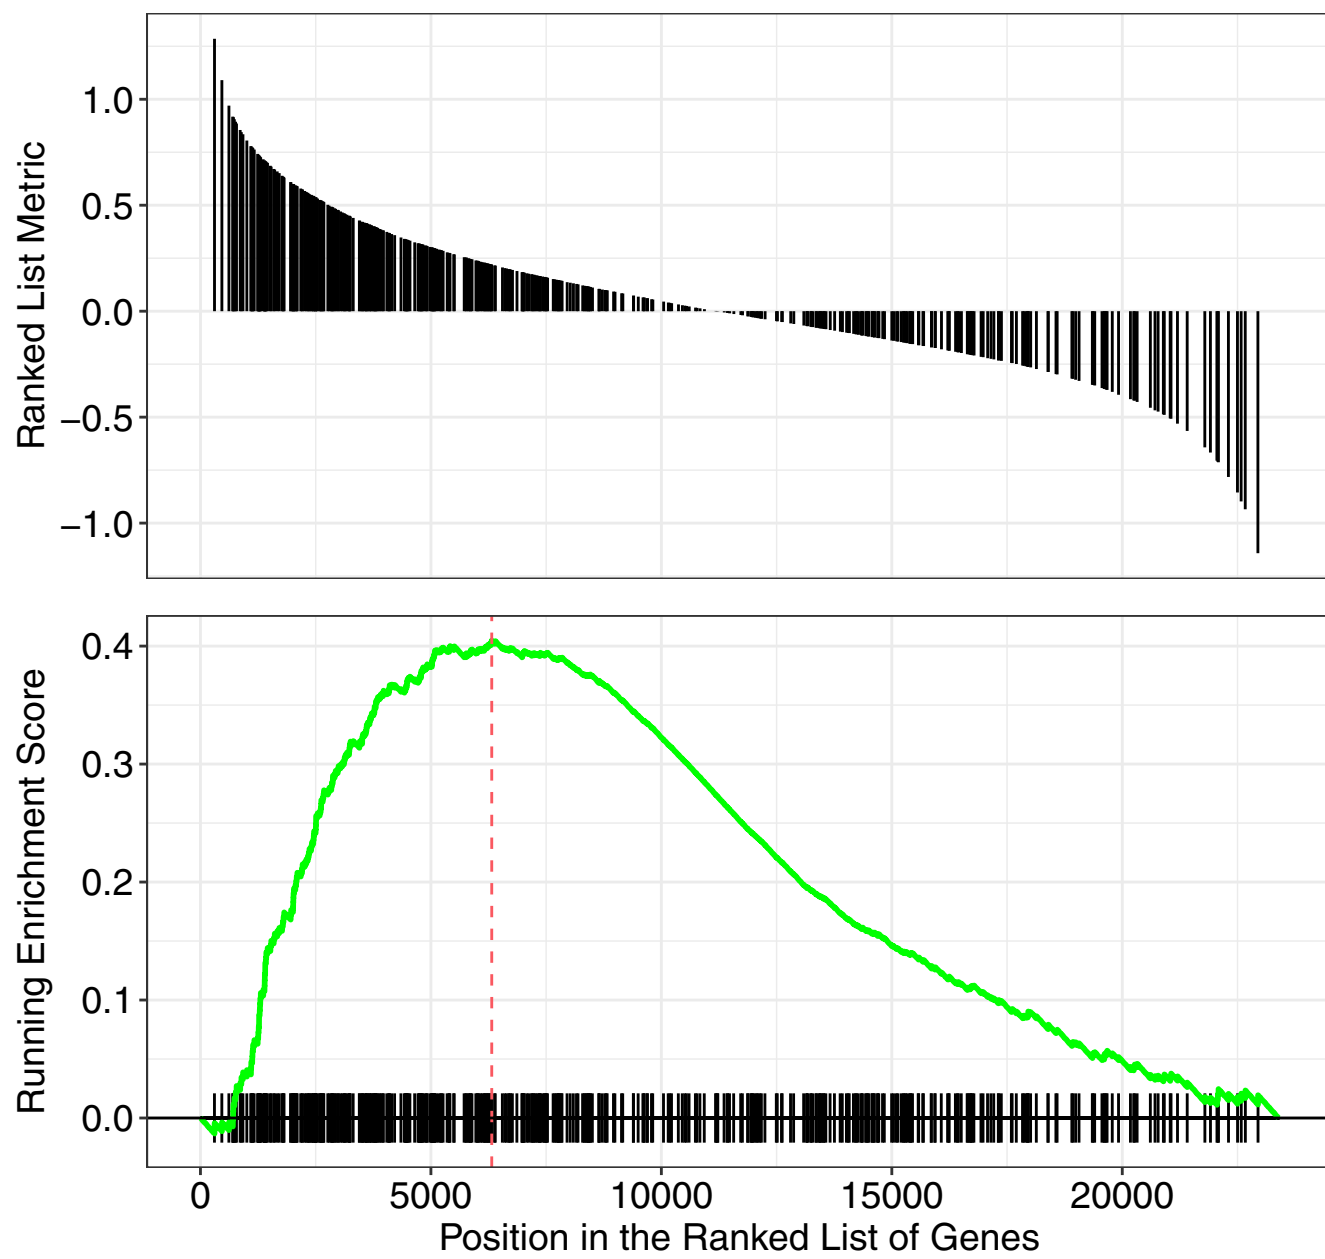

### neuron projection morphogenesis

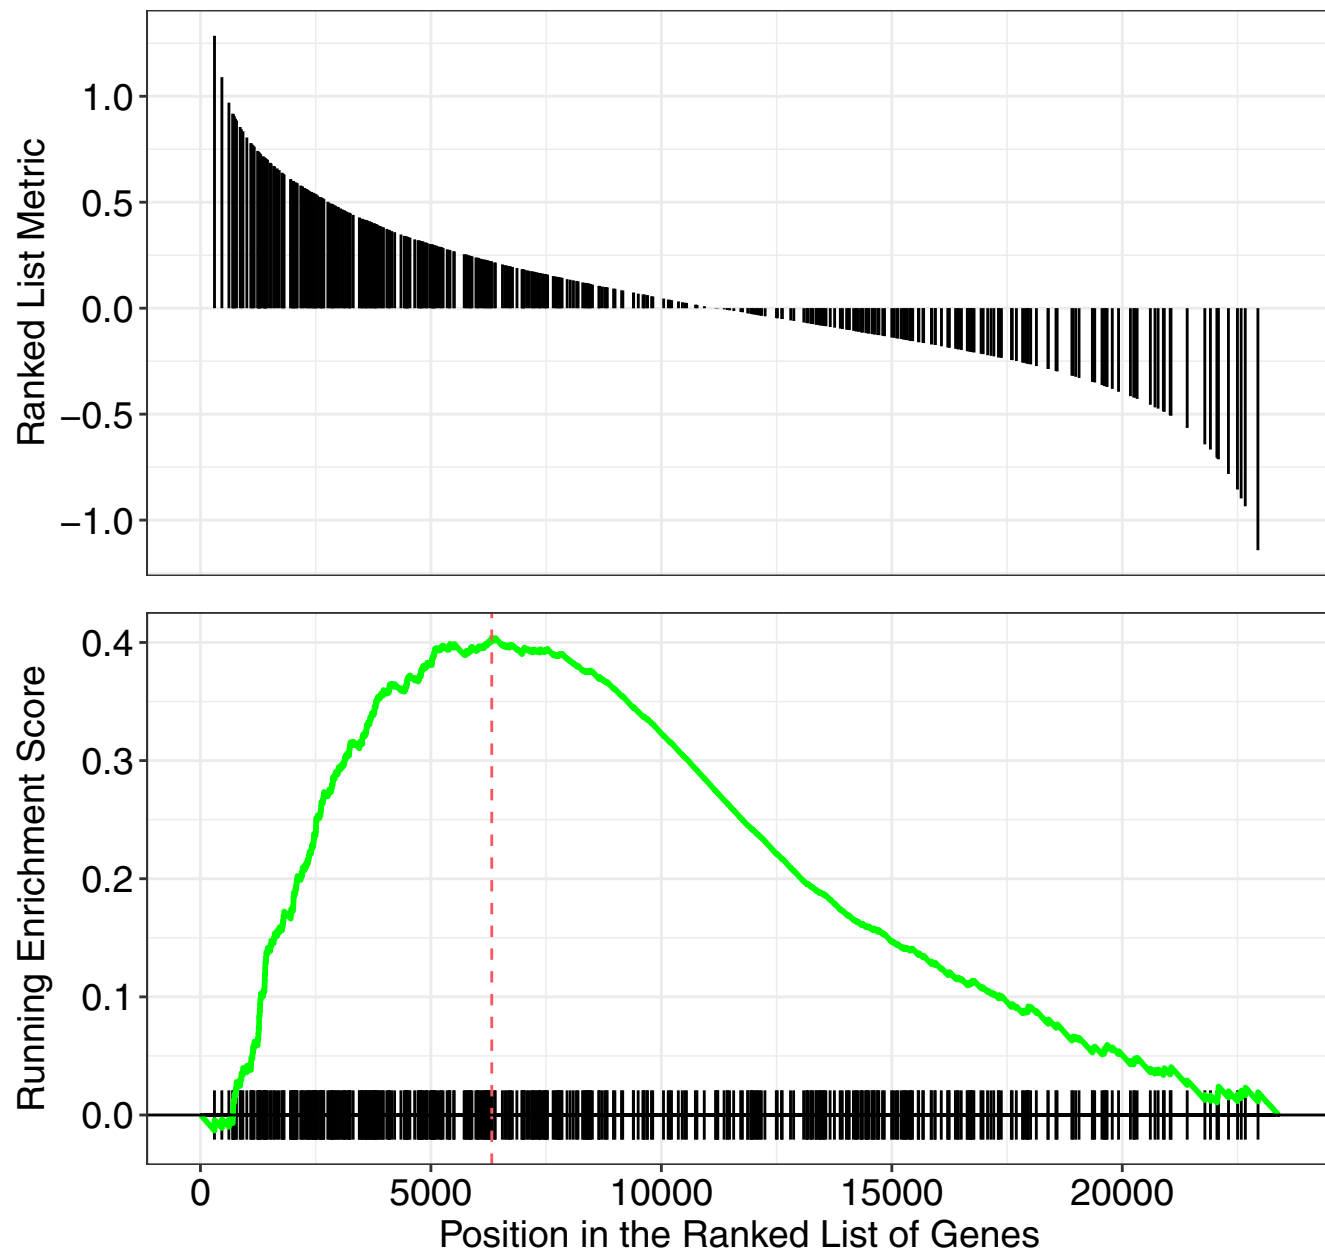

## plasma membrane bounded cell projection morphogenesis

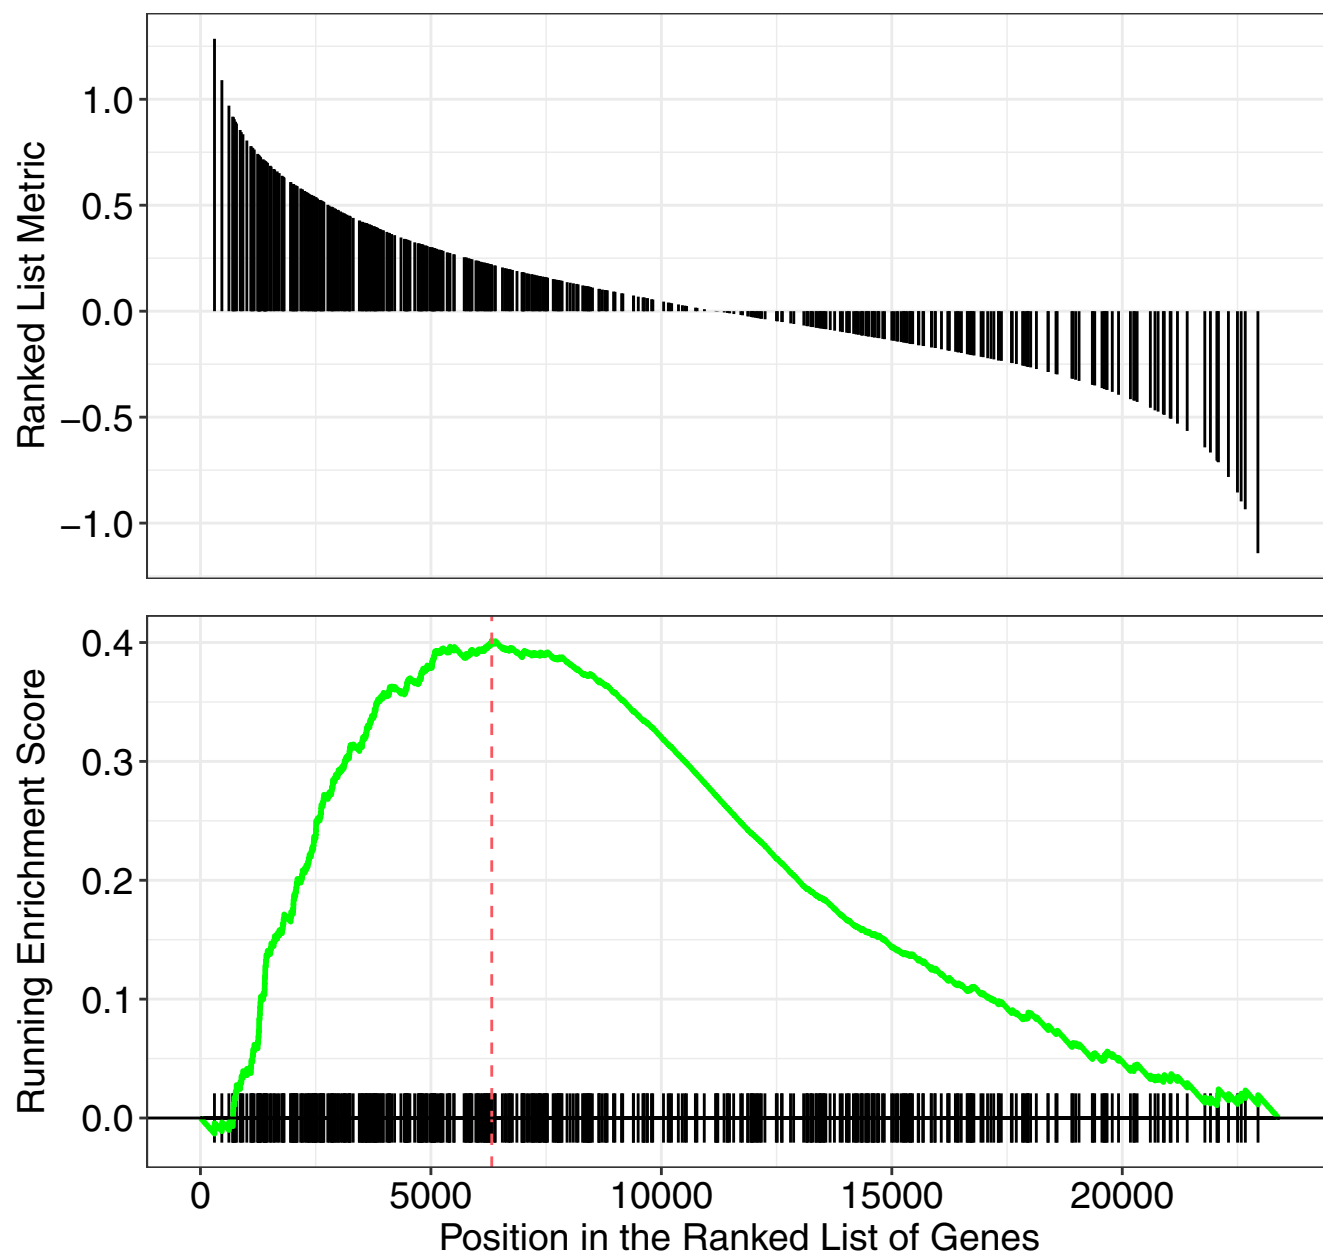

### cell part morphogenesis

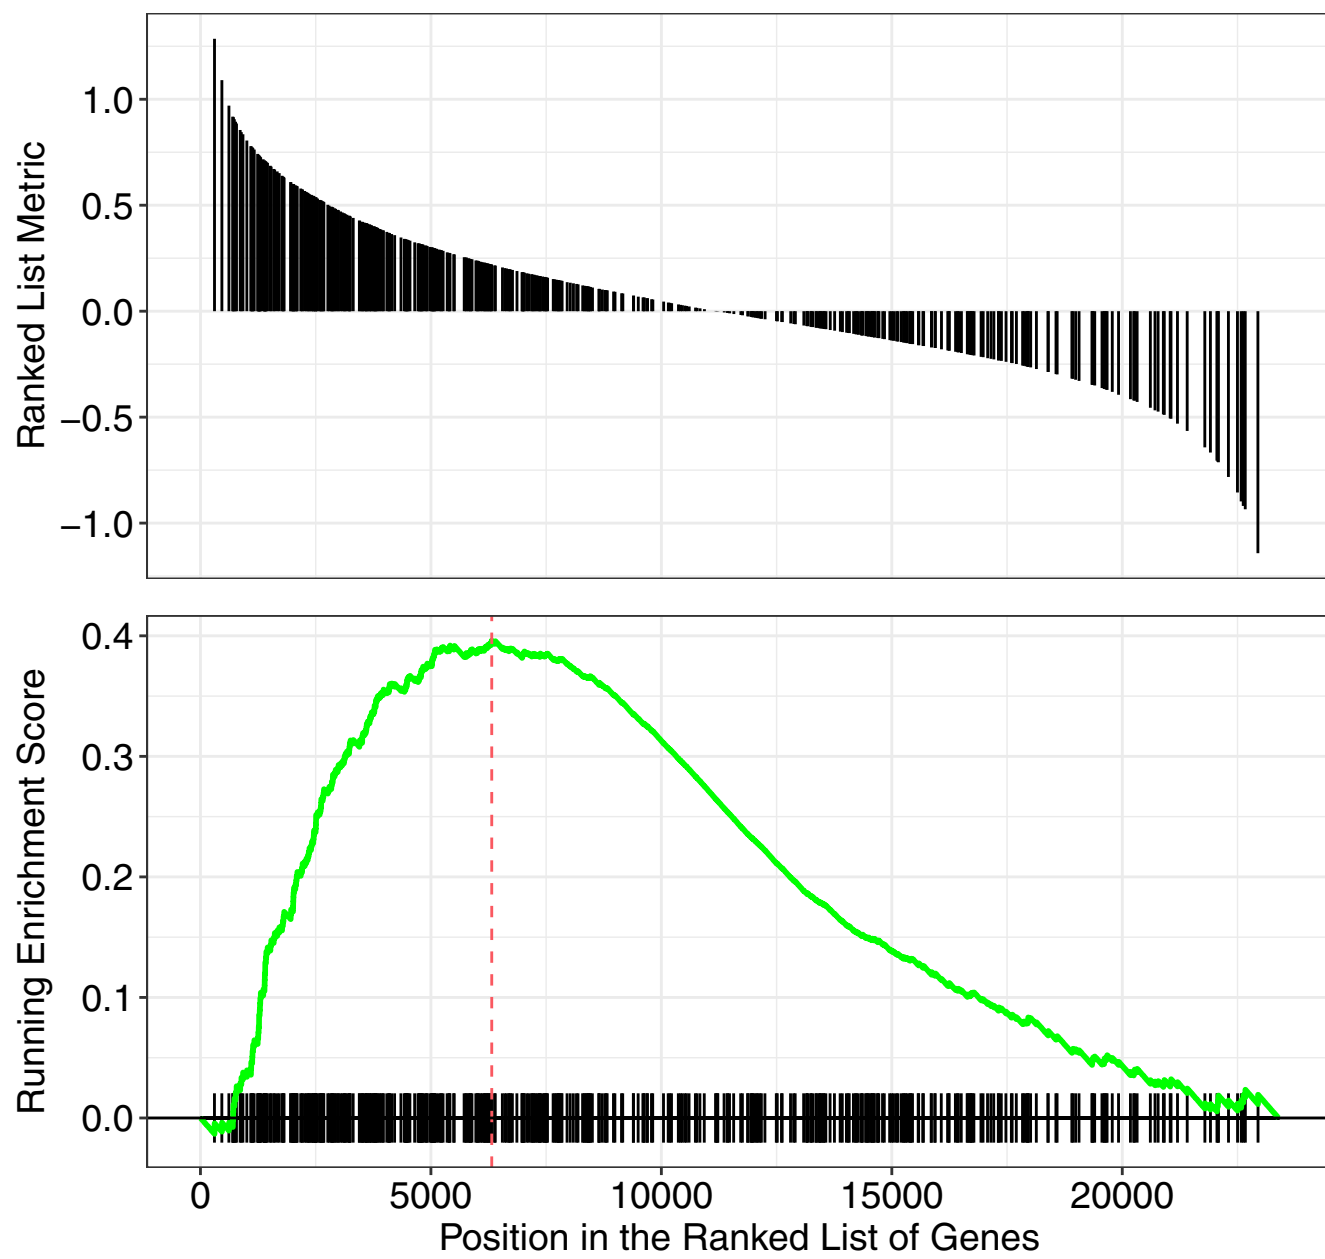

## cell morphogenesis involved in neuron differentiation

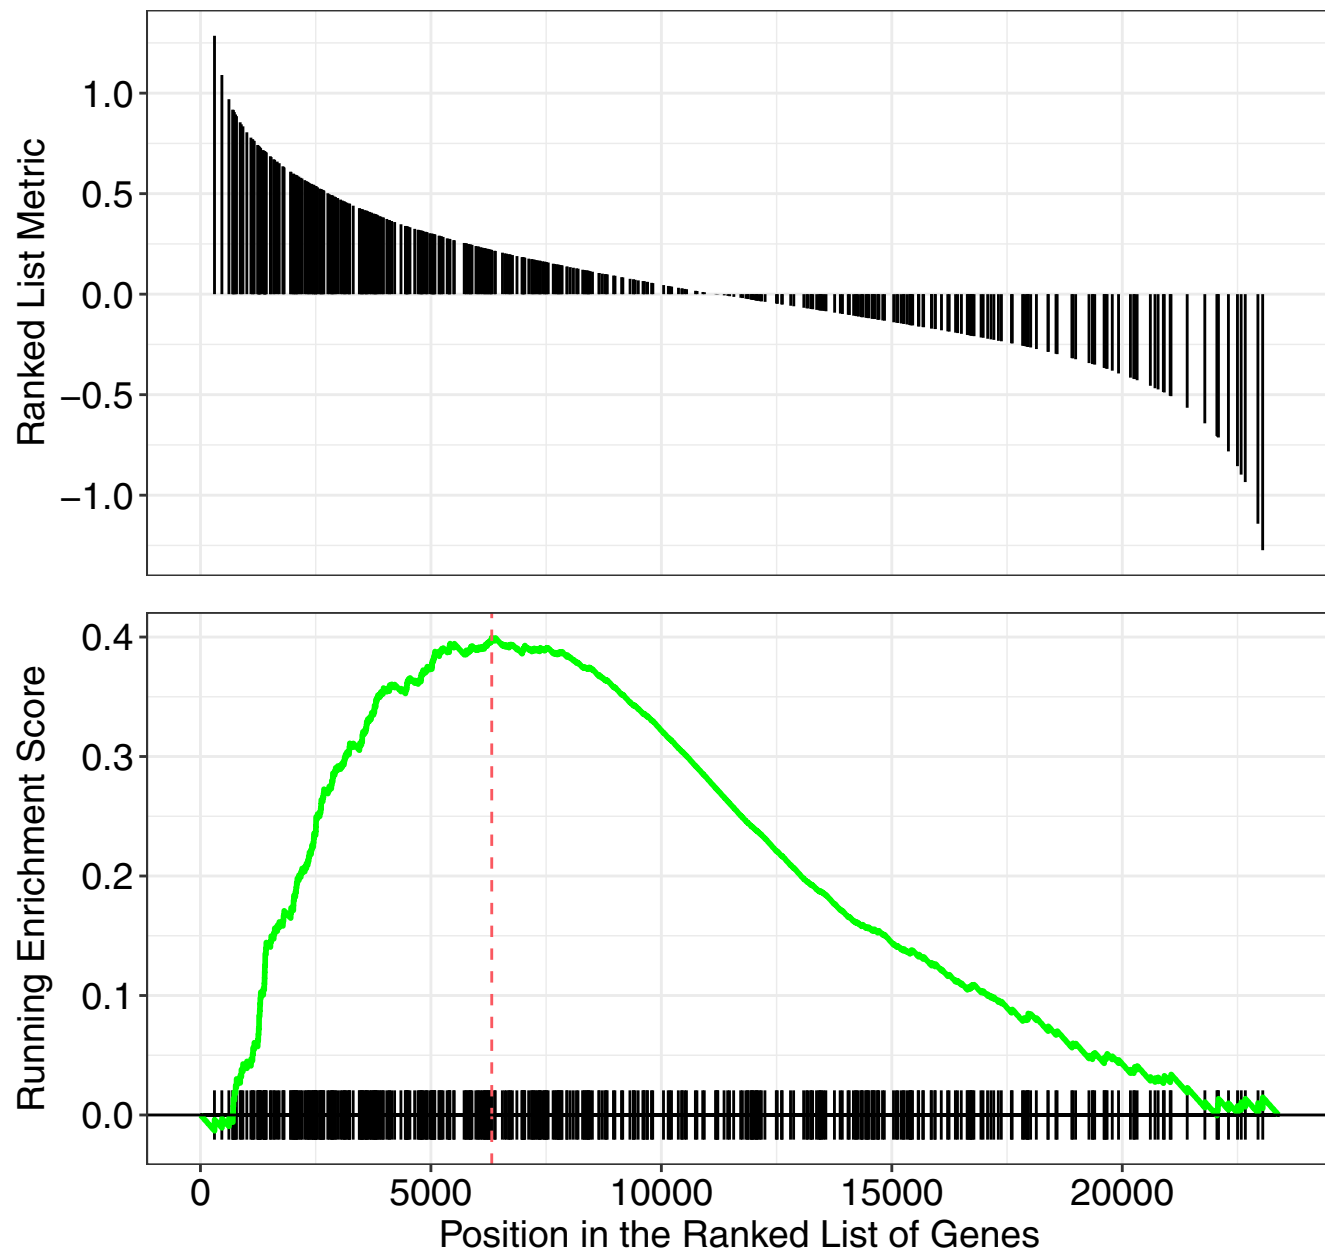

## axonogenesis

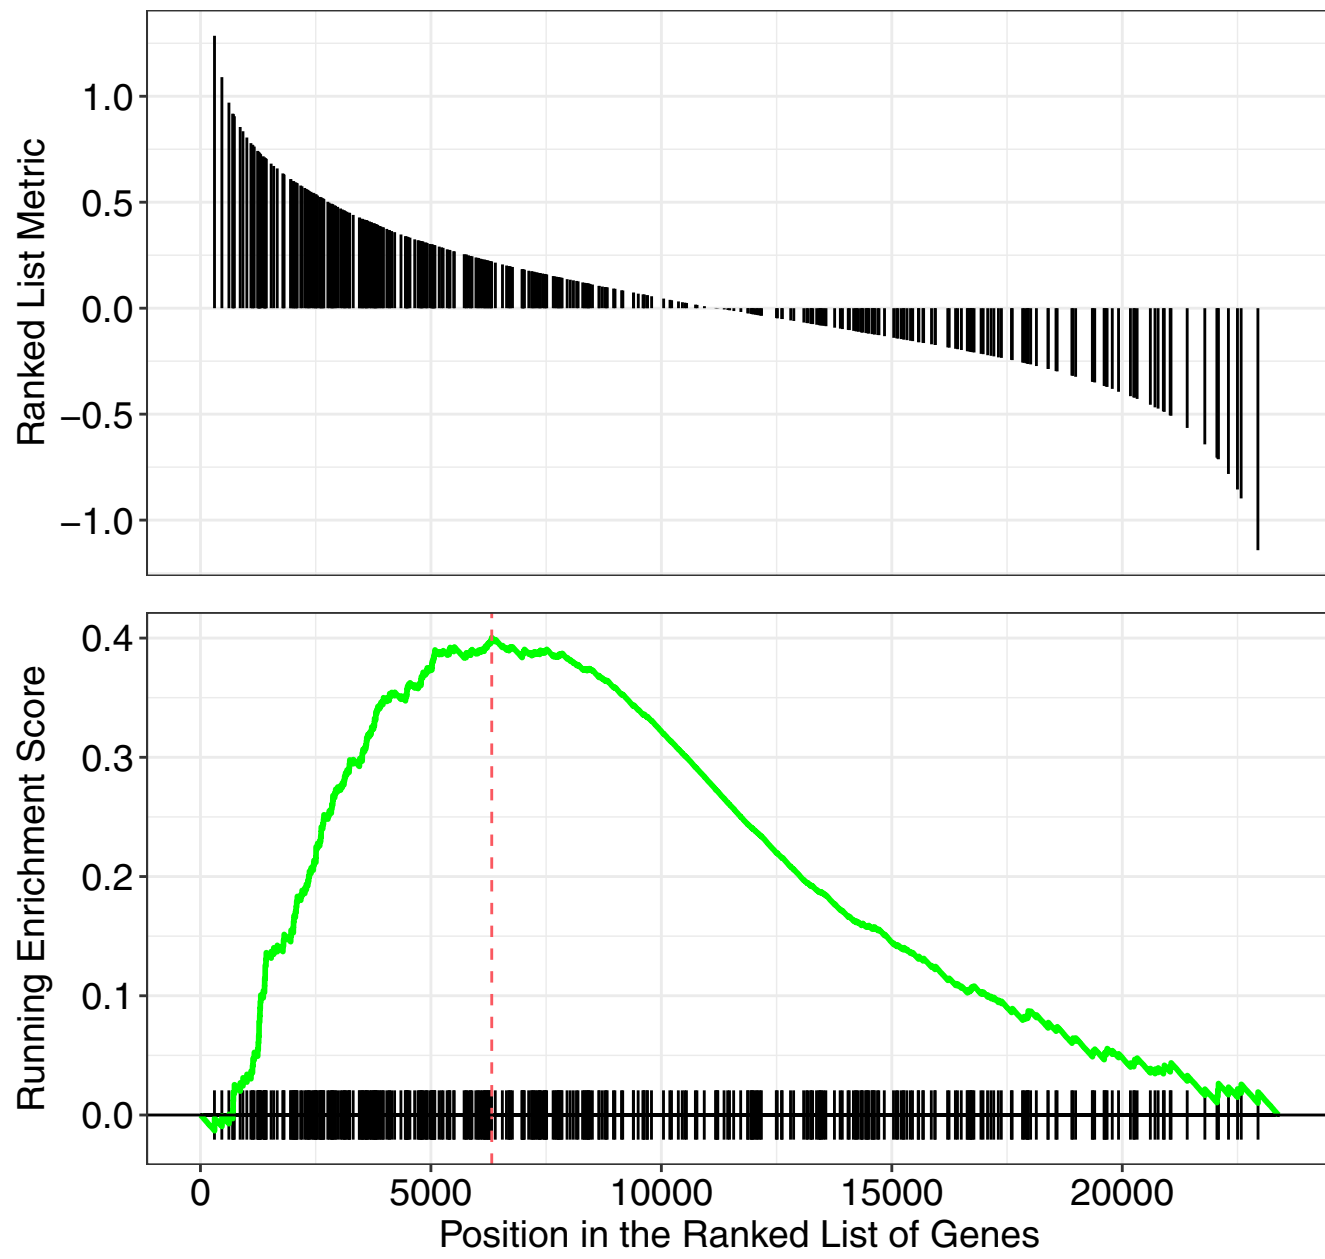

### transcription factor binding

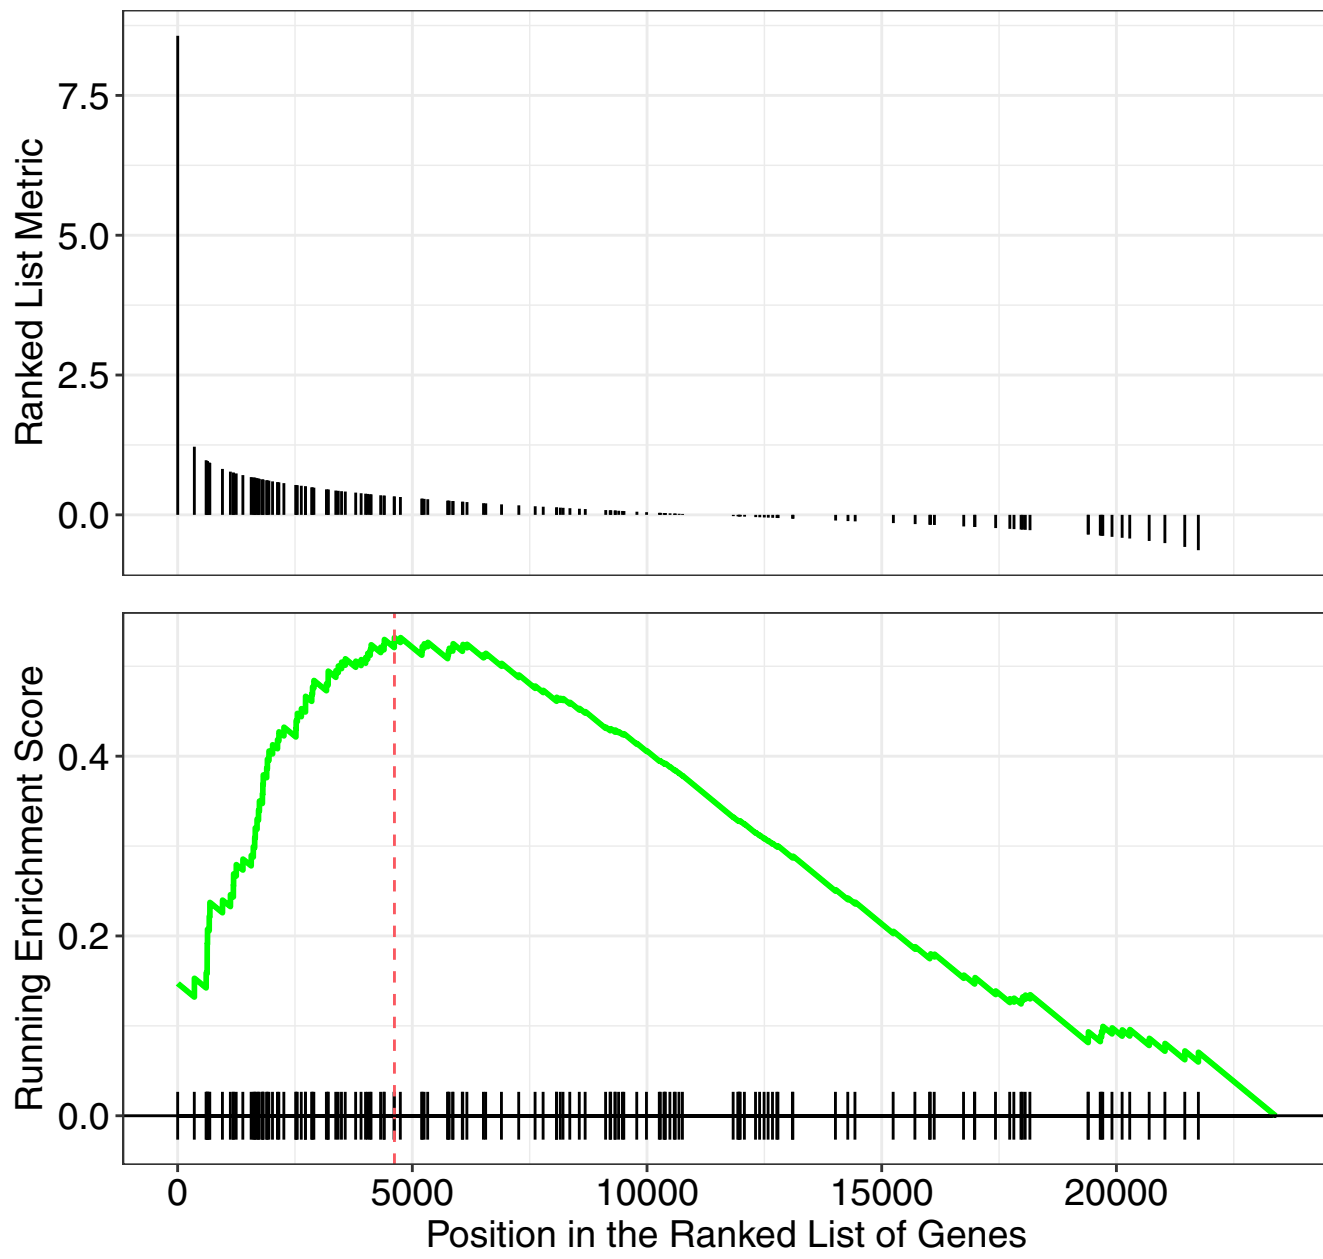



### axon development

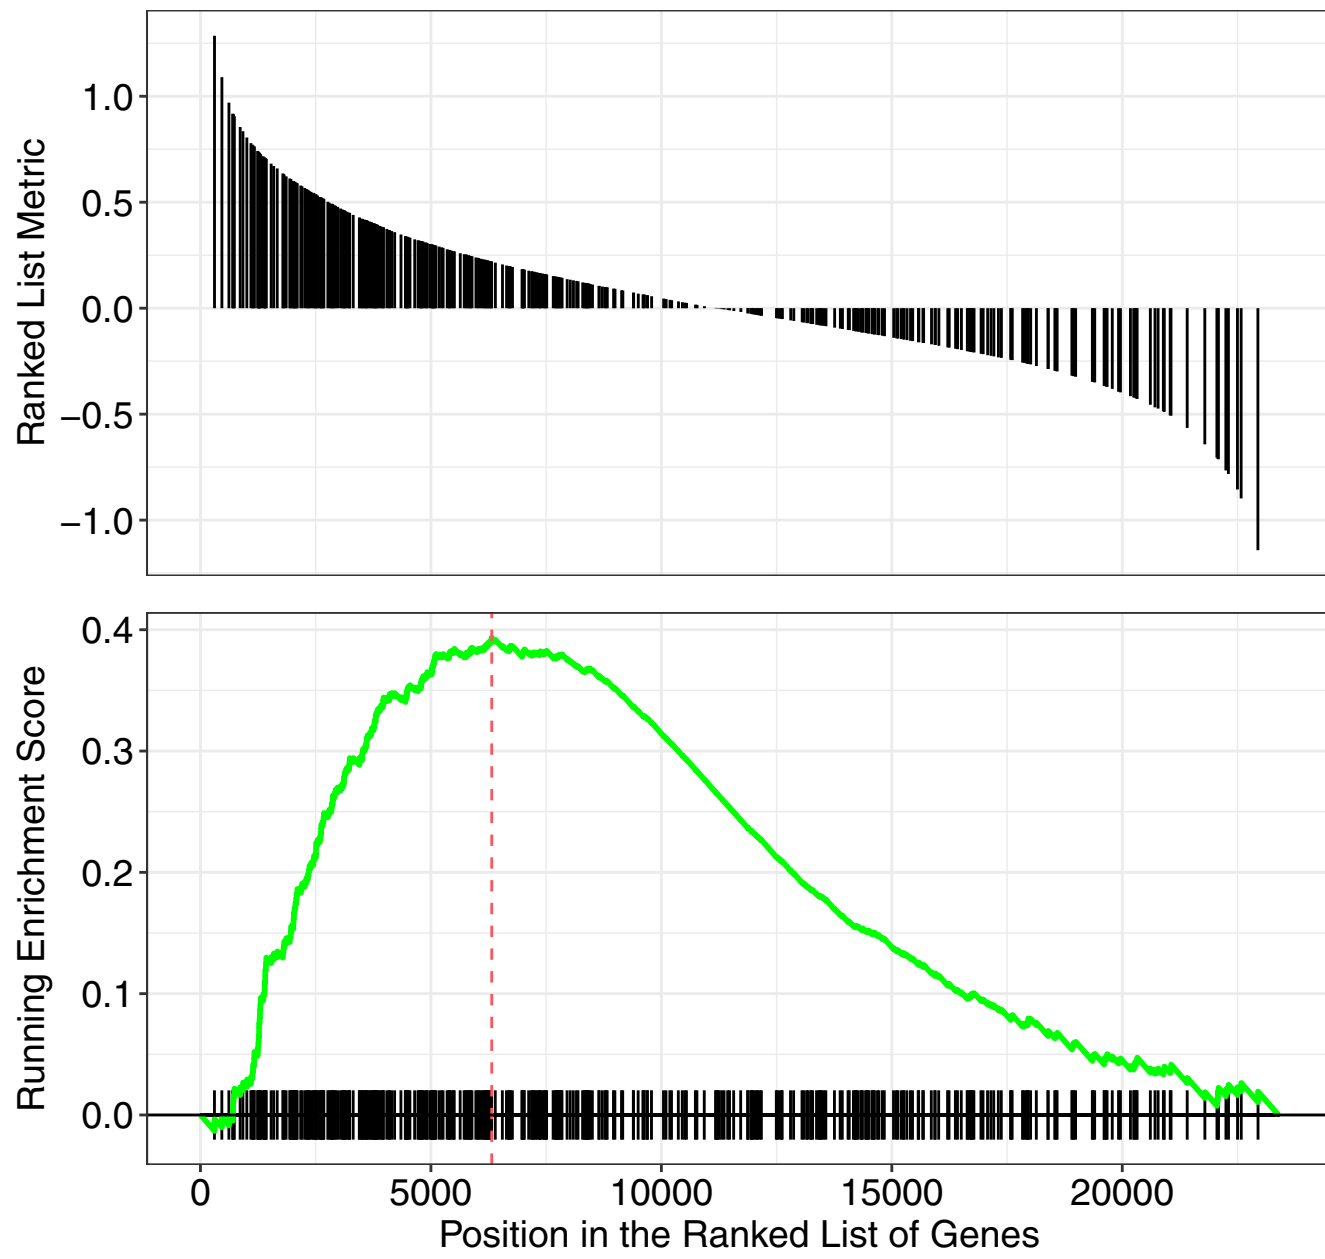

### collagen trimer

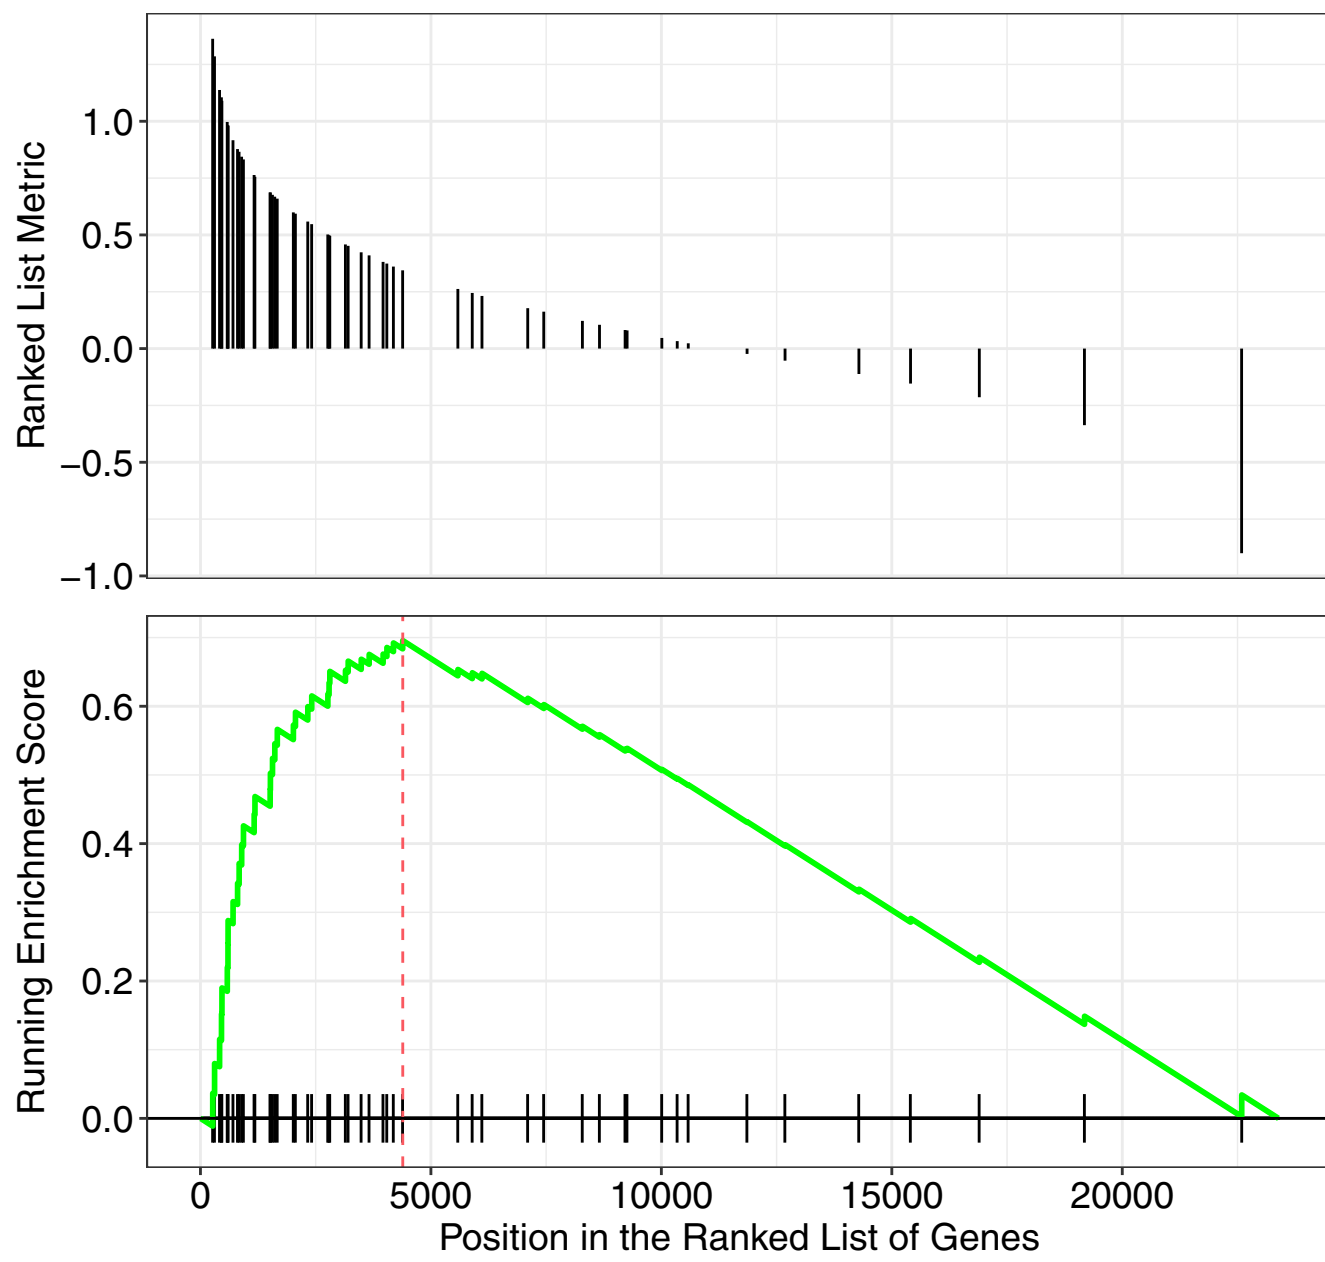

## modulation of chemical synaptic transmission

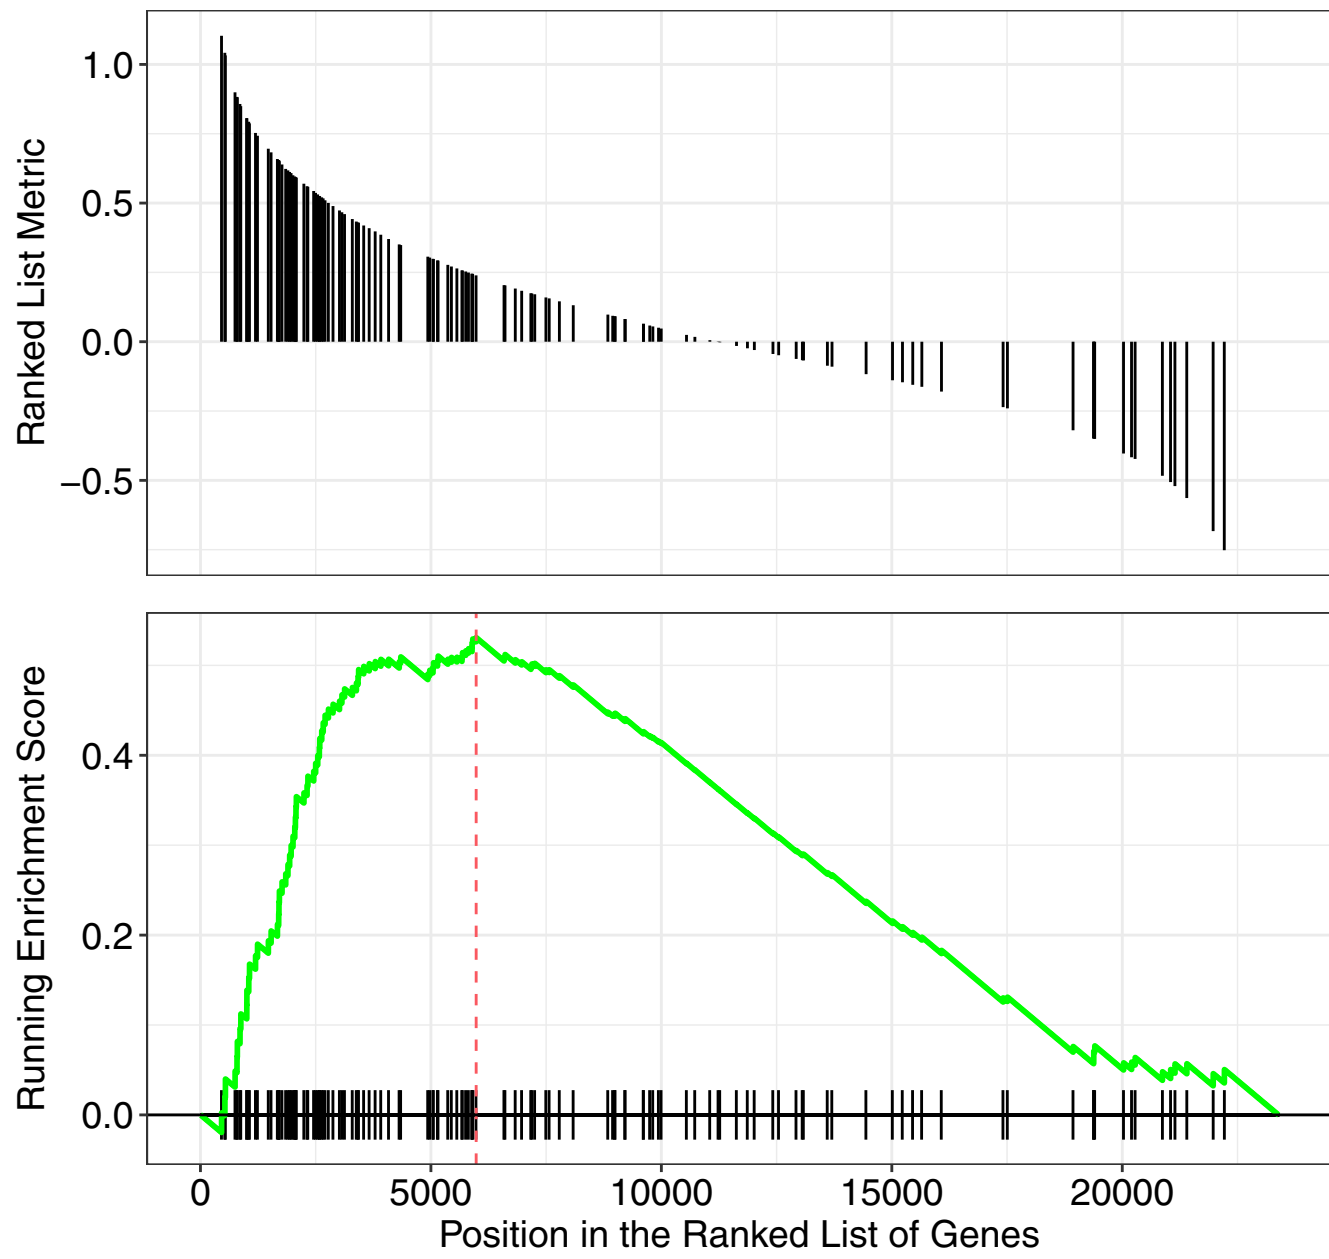

### regulation of trans-synaptic signaling

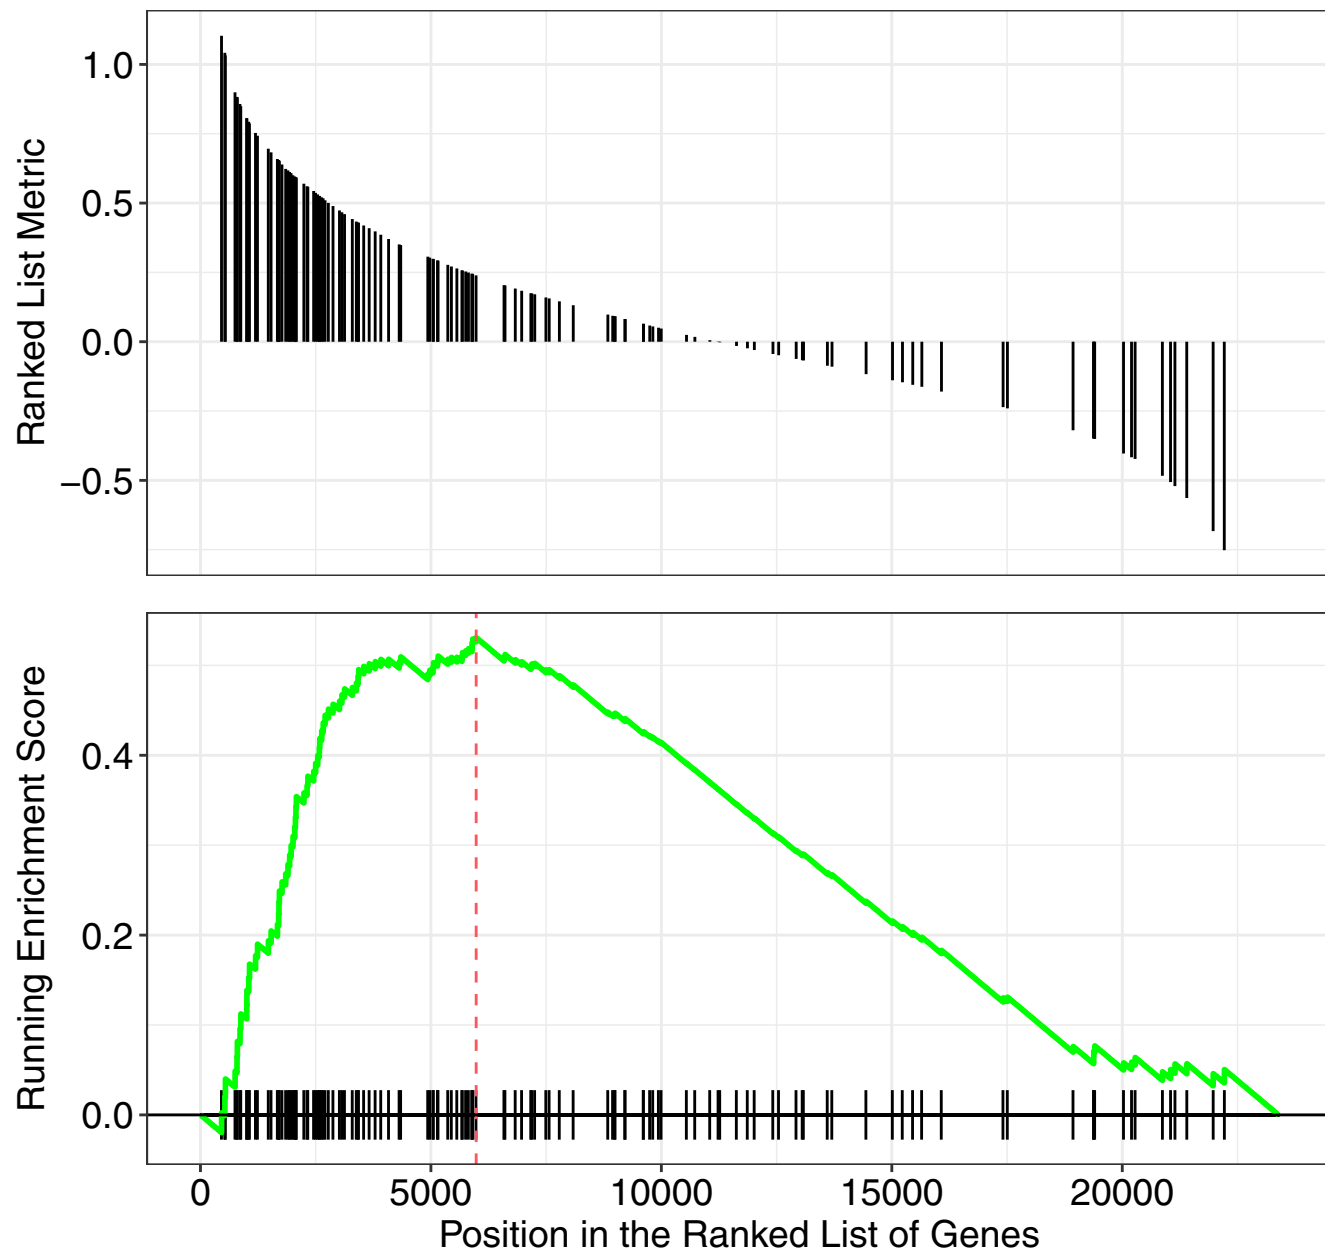

## regionalization

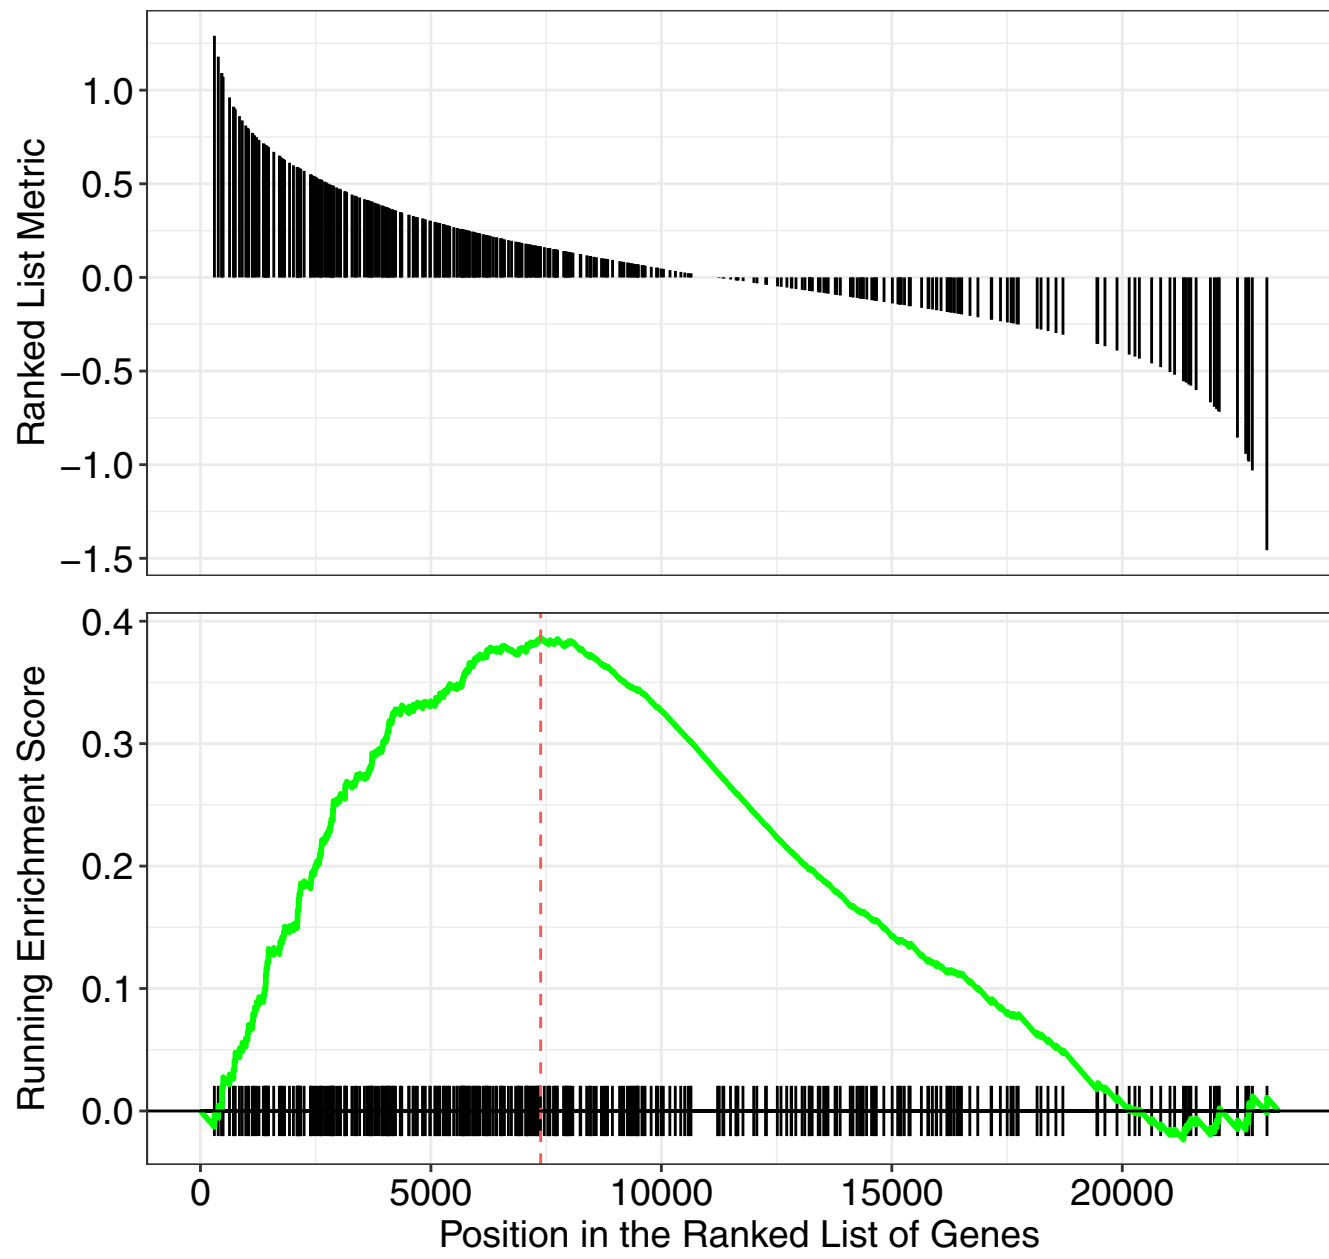

### central nervous system neuron differentiation

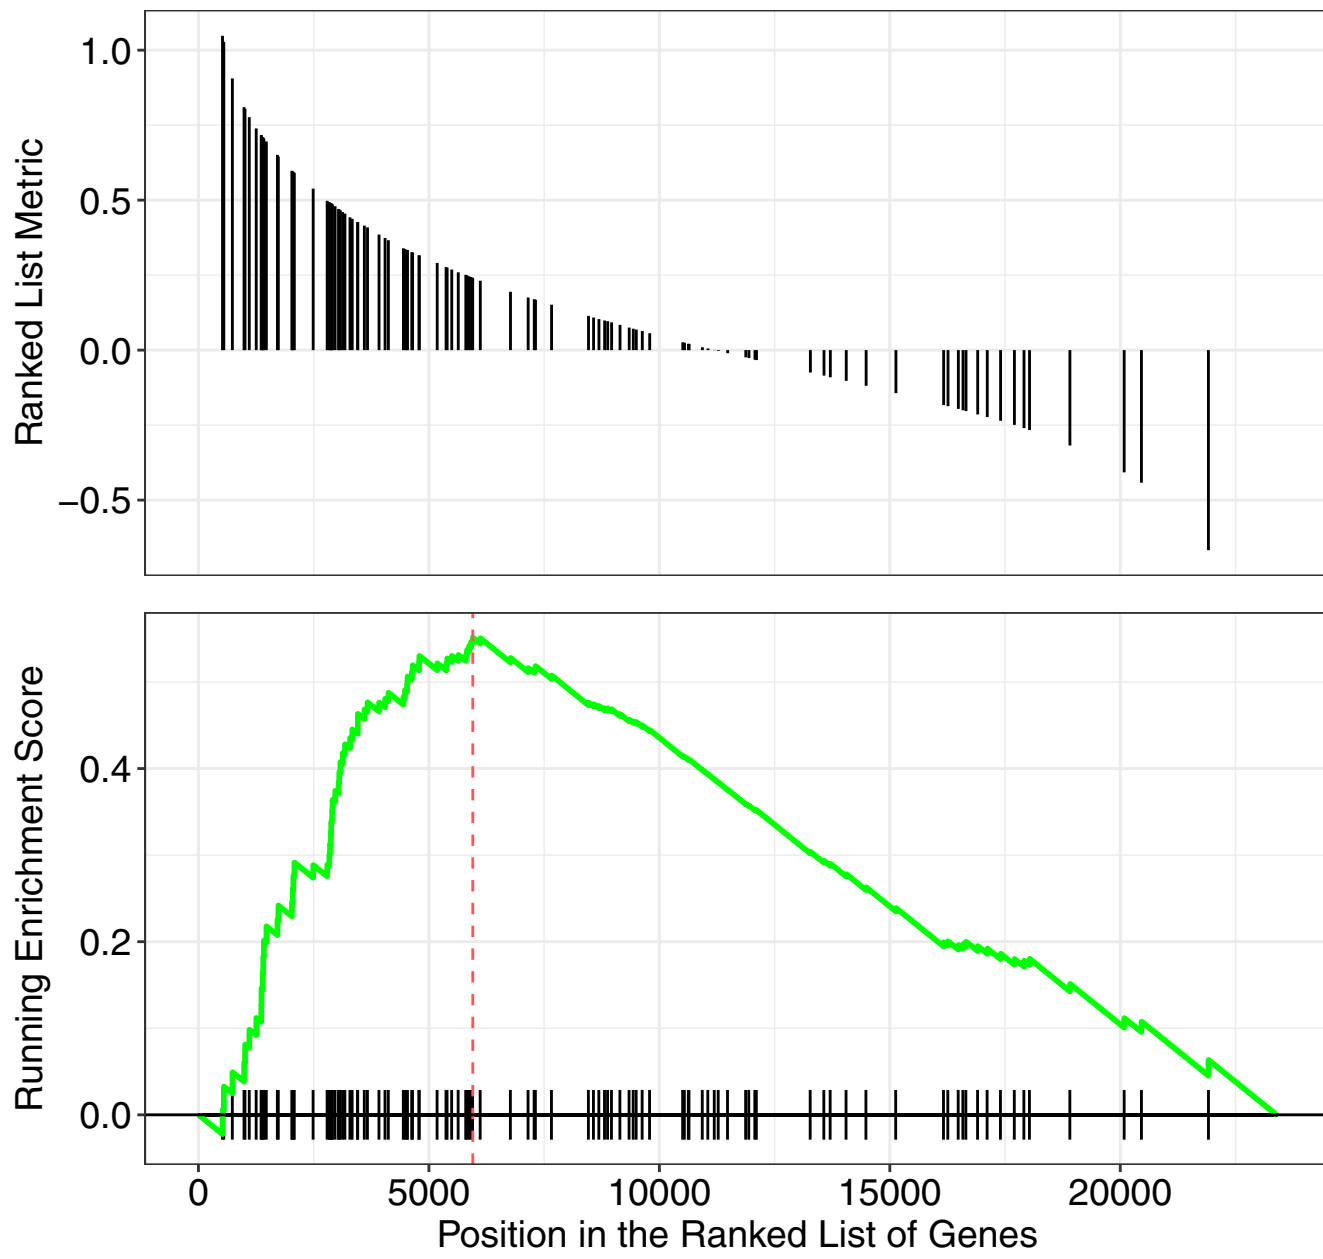

### axon guidance

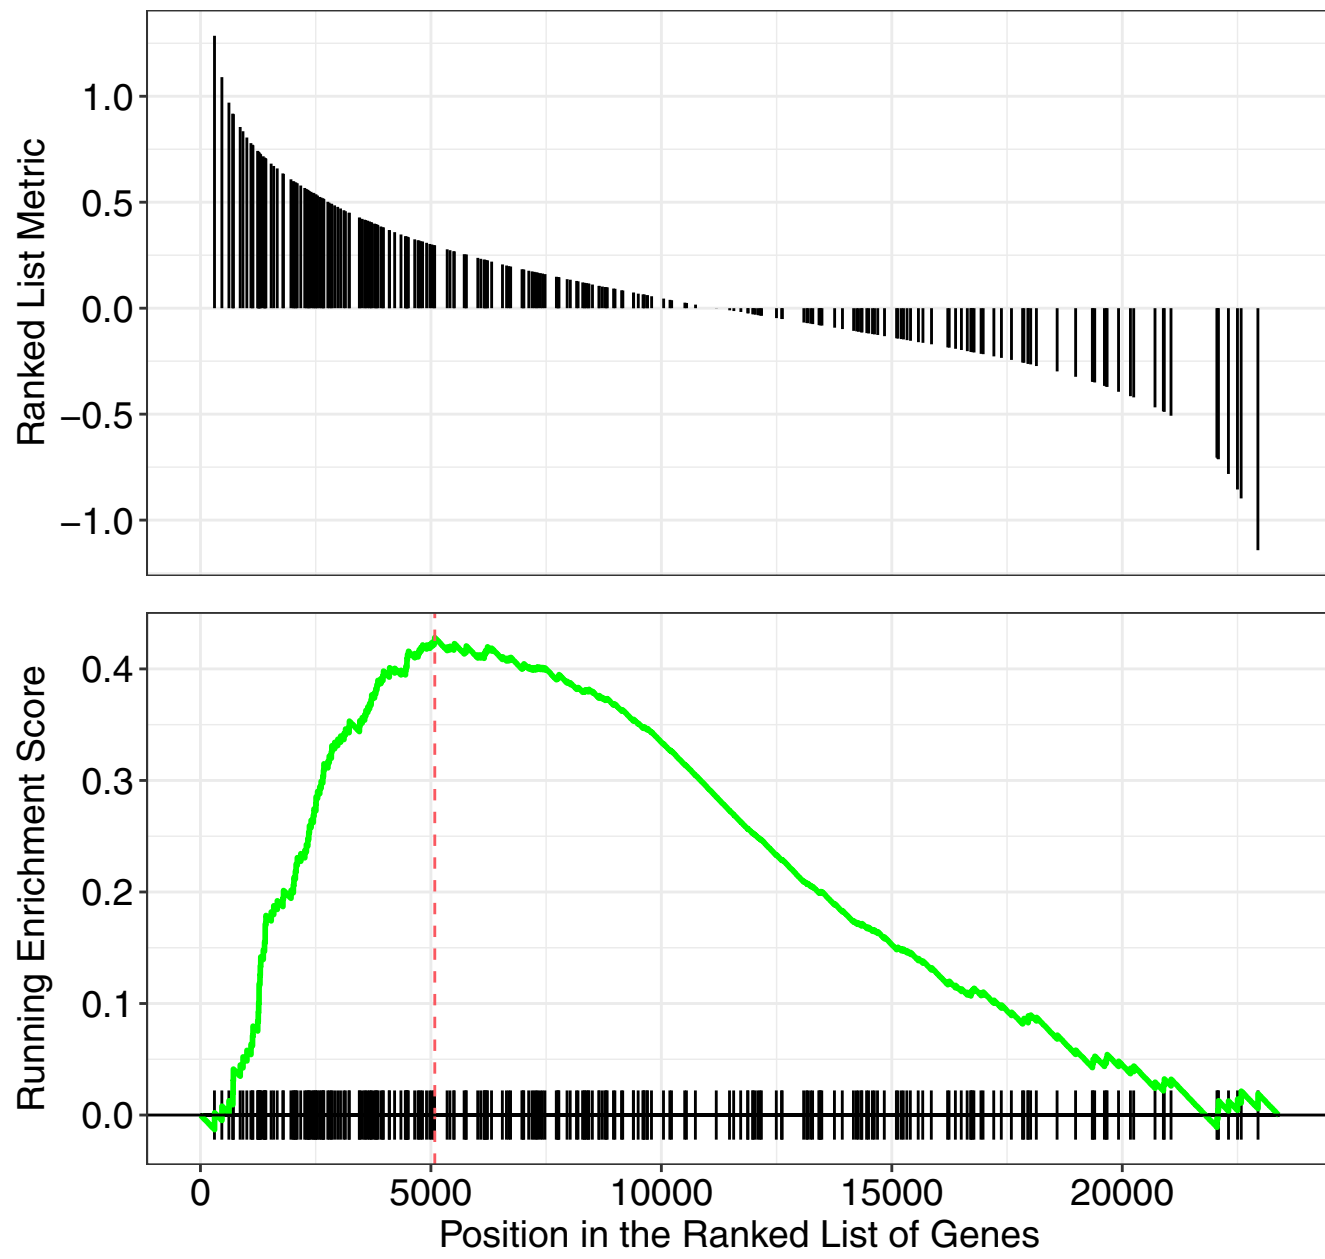

## skeletal system development

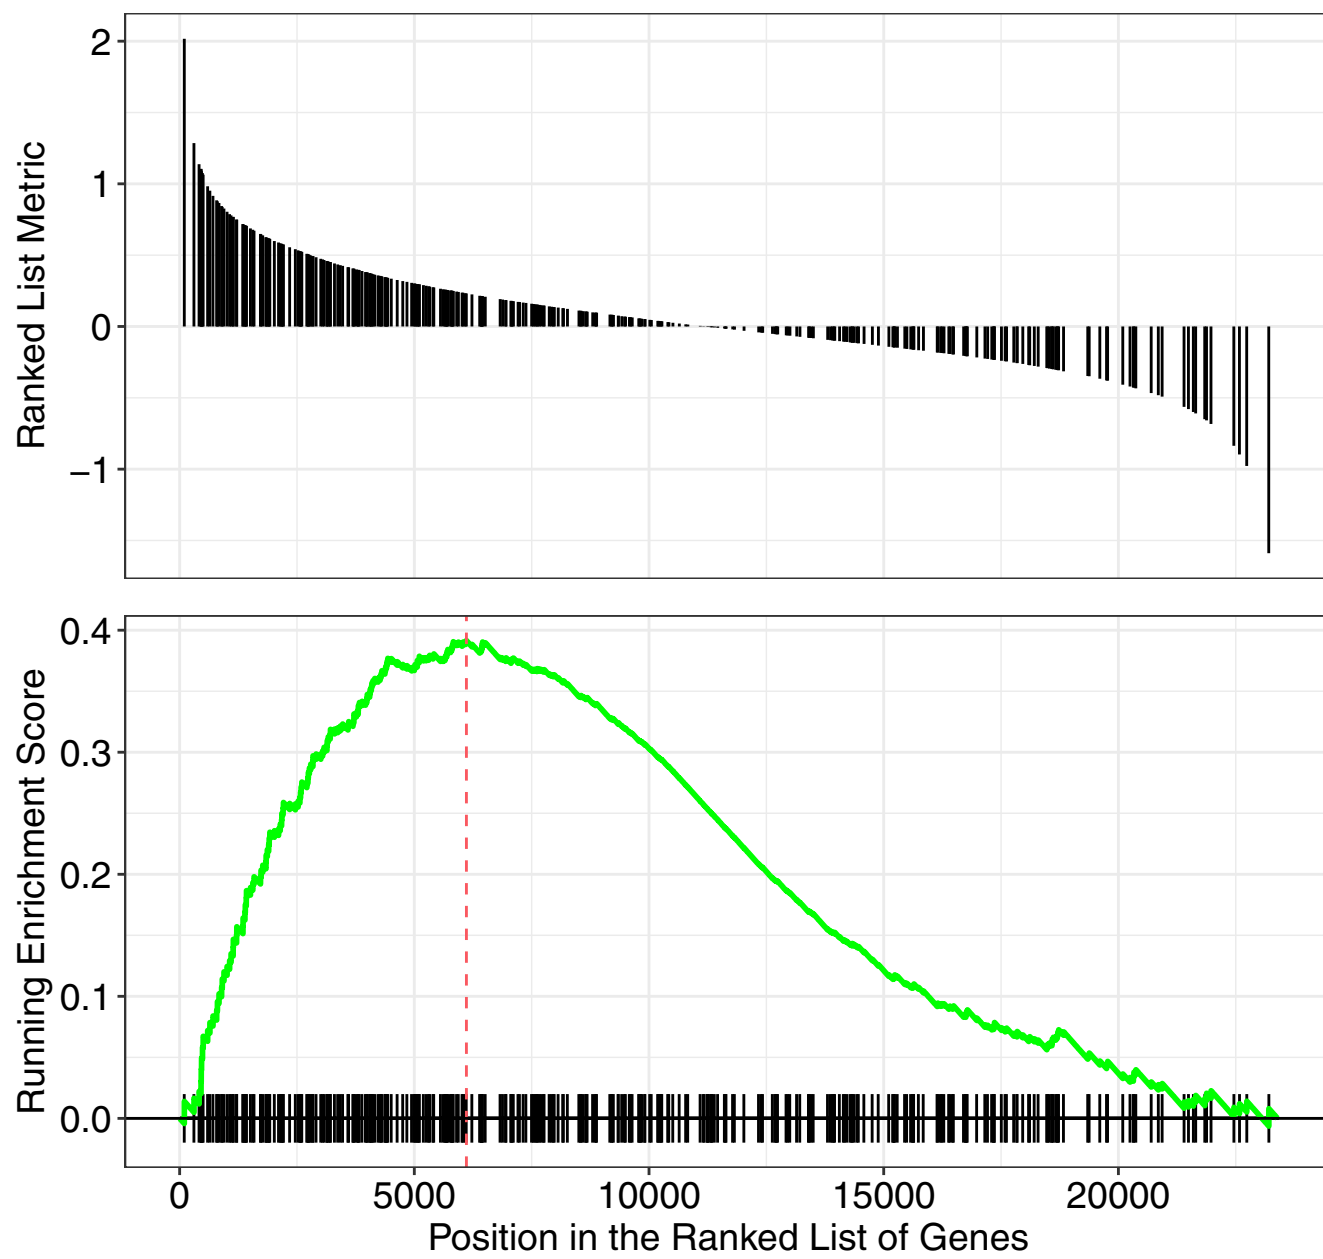



### extracellular matrix structural constituent

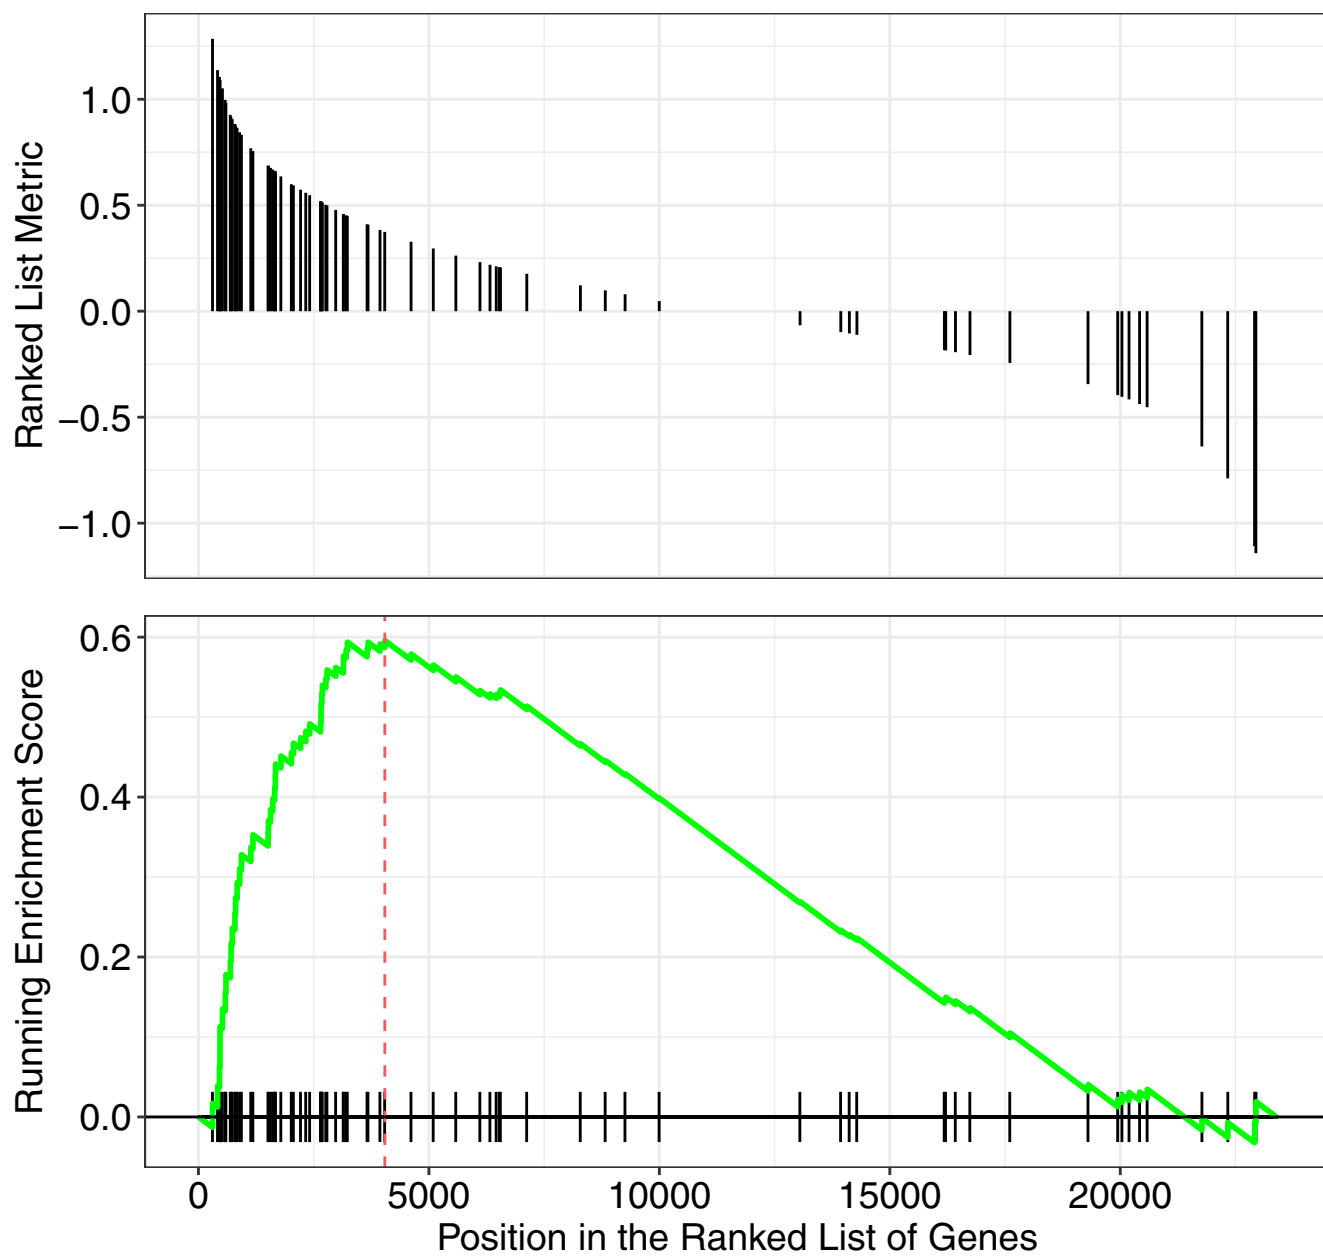

### neuron projection guidance

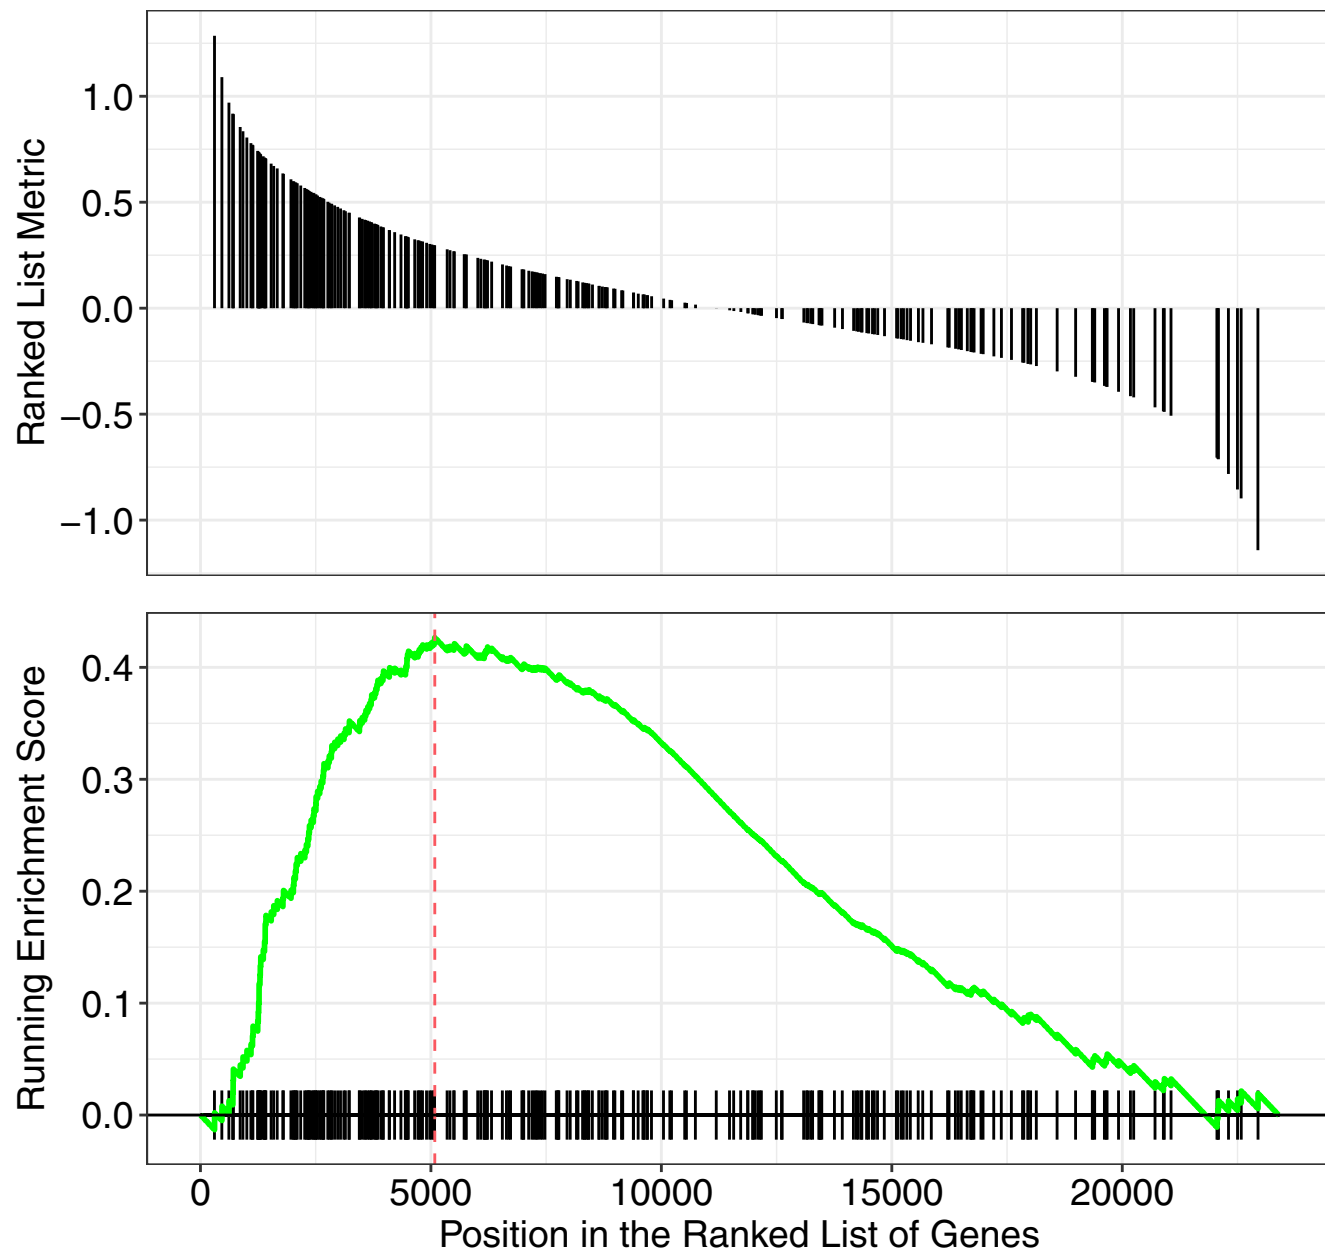

### sensory organ morphogenesis

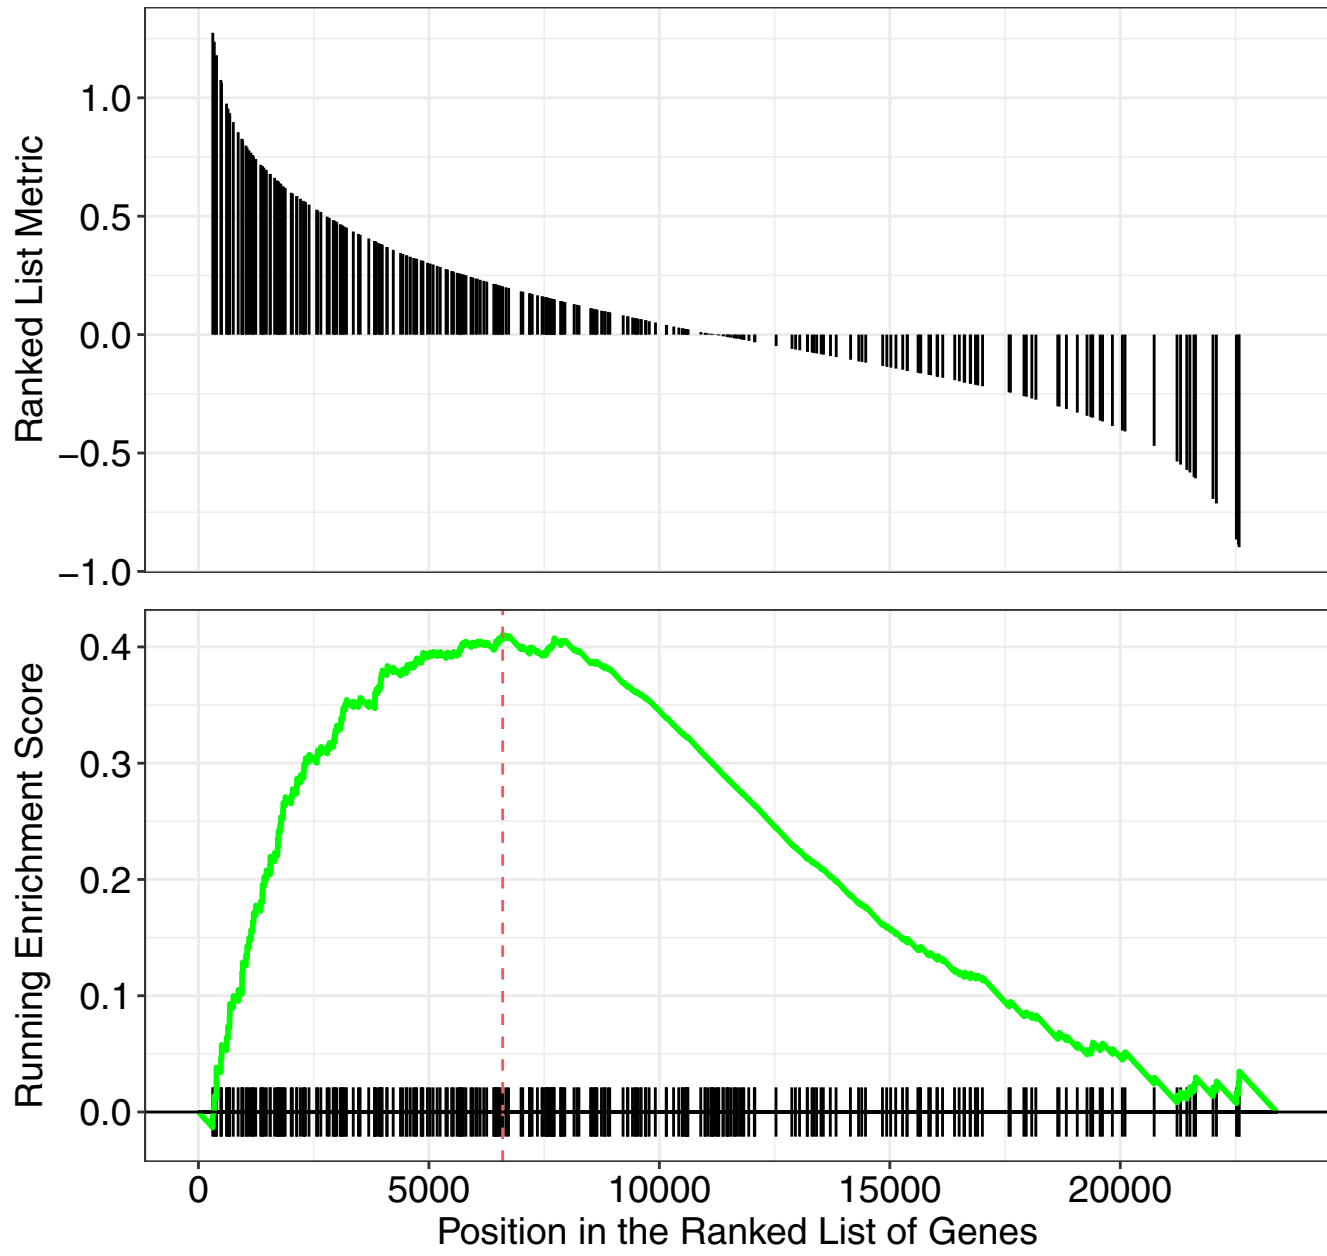

### eye morphogenesis

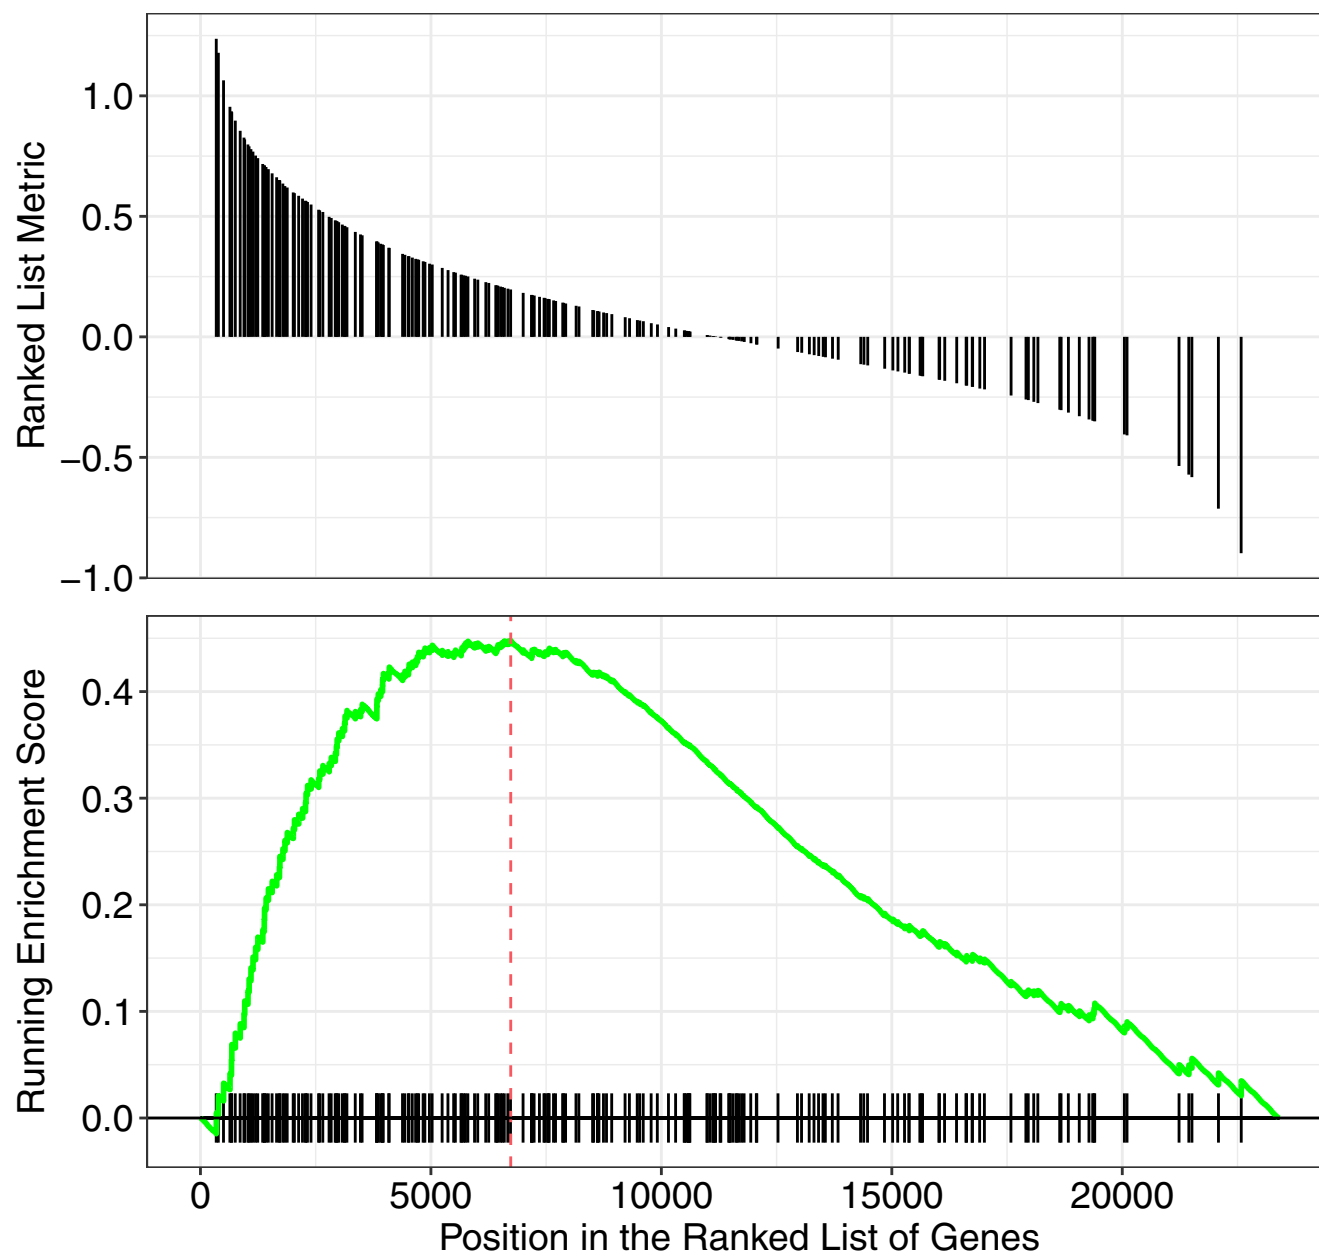

### postsynaptic specialization

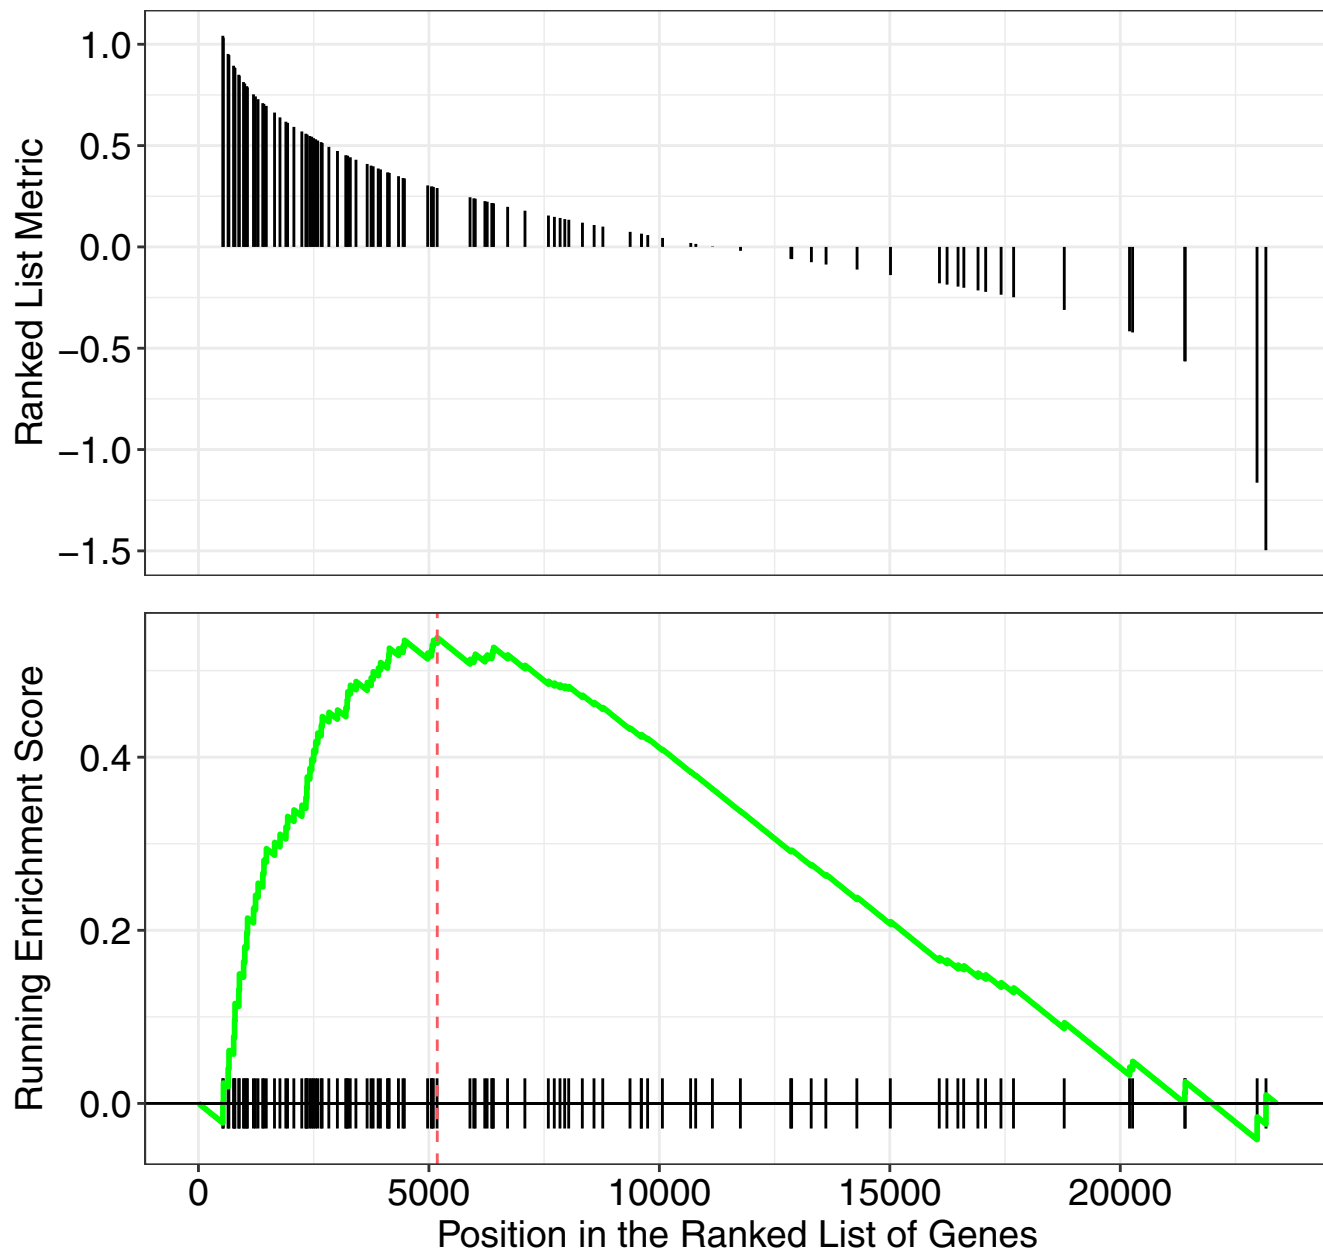

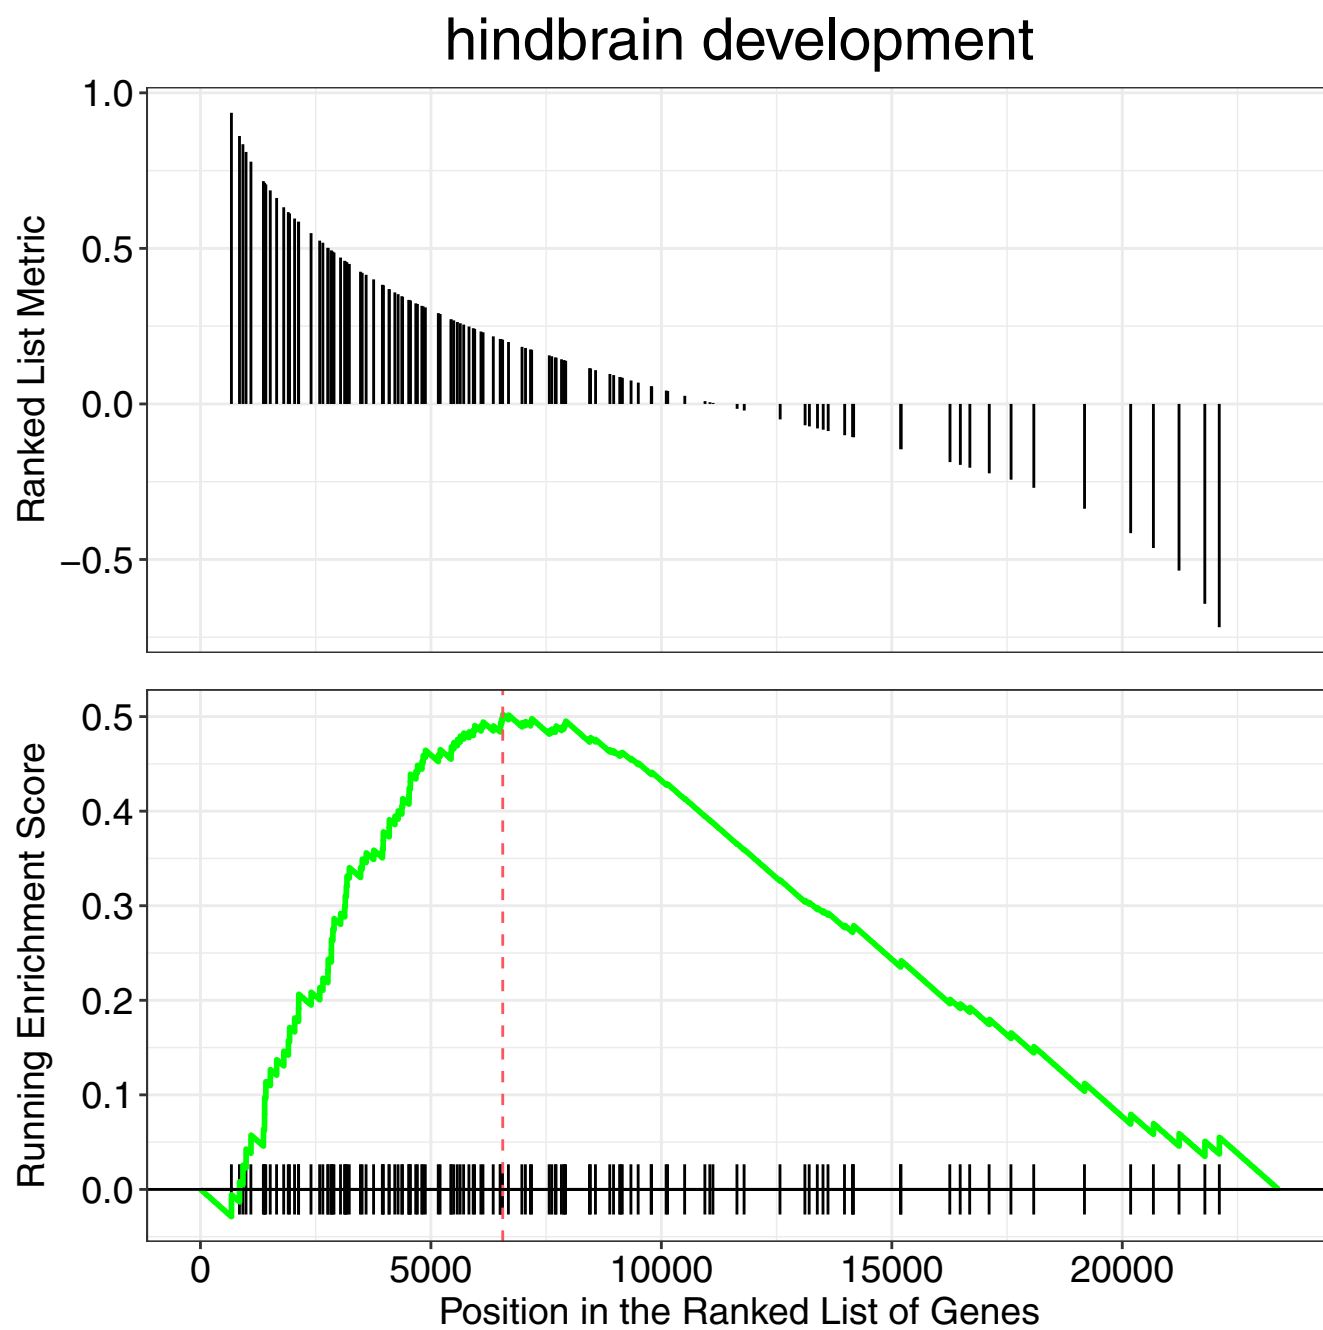

**Fig. S5.** Enrichment plots of Gene set enrichment analysis (GSEA) of differentially expressed genes in *alx1;alx3* mutants. Running score plot and pre-ranked list of top 25 activated GSEA terms shown in Figure 5D.

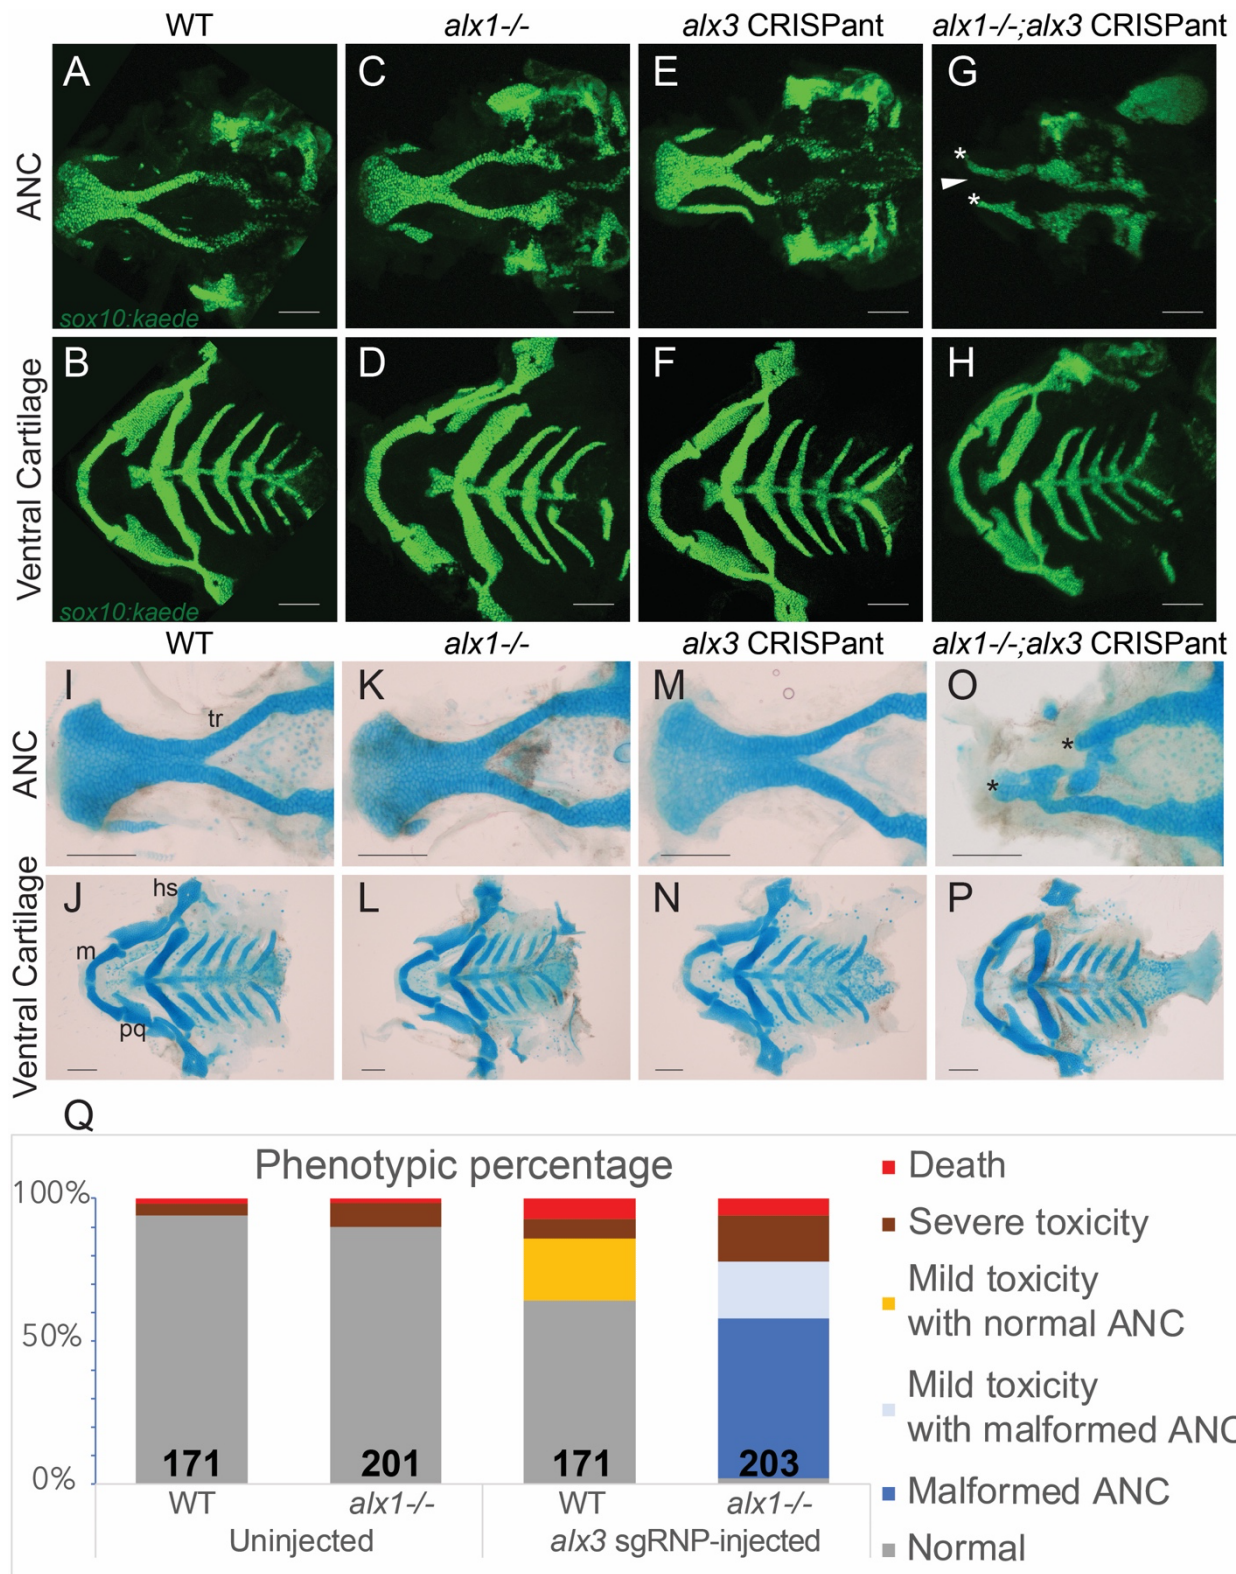

**Fig. S6. *alx1*; *alx3CR* phenocopy *alx1*; *alx3* double mutants.** Embryos derived from Tg(sox10:kaede) embryos or *alx1*<sup>uw2016</sup>; Tg(sox10:kaede) were injected with *alx3* CRISPR/Cas9 and fixed at 4 dpf. Embryos were dissected, and flat-mounted in order to image the anterior neurocranium (ANC) and ventral pharyngeal cartilage. *alx1*; *alx3CR* developed with midline cleft (arrowhead in G), with the lateral elements (asterisks in G) separated due to the missing median element. I – P: Dissected flat-mount Alcian Blue-stained cartilage in larvae of different genotypes, anterior to the left. I: WT embryo with normal paired trabeculae (tr) and a normal ANC. O: *alx1*; *alx3CR* with defective trabeculae fusion (asterisks) and depleted ethmoid plate. Q: Percentage of embryos displaying malformed anterior neurocranium (ANC) phenotype in larvae of different genotypes. All embryos are shown with anterior to the left. Scale bar: 100µm.



### lens development in camera-type eye

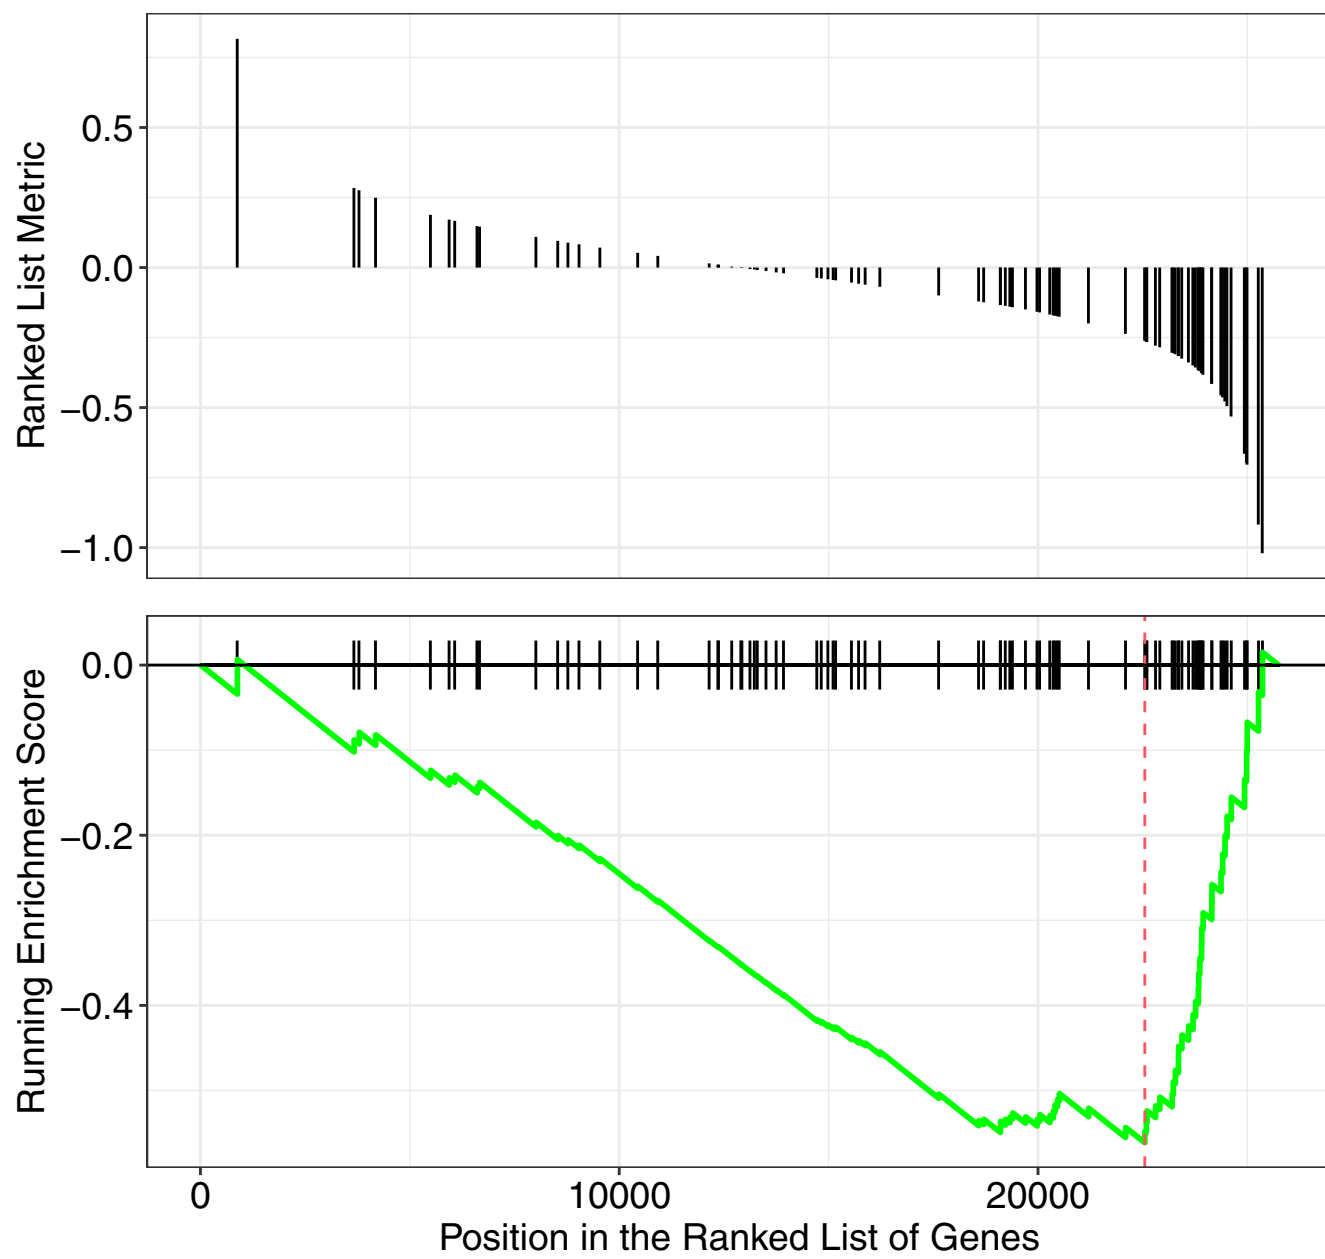

### structural constituent of eye lens

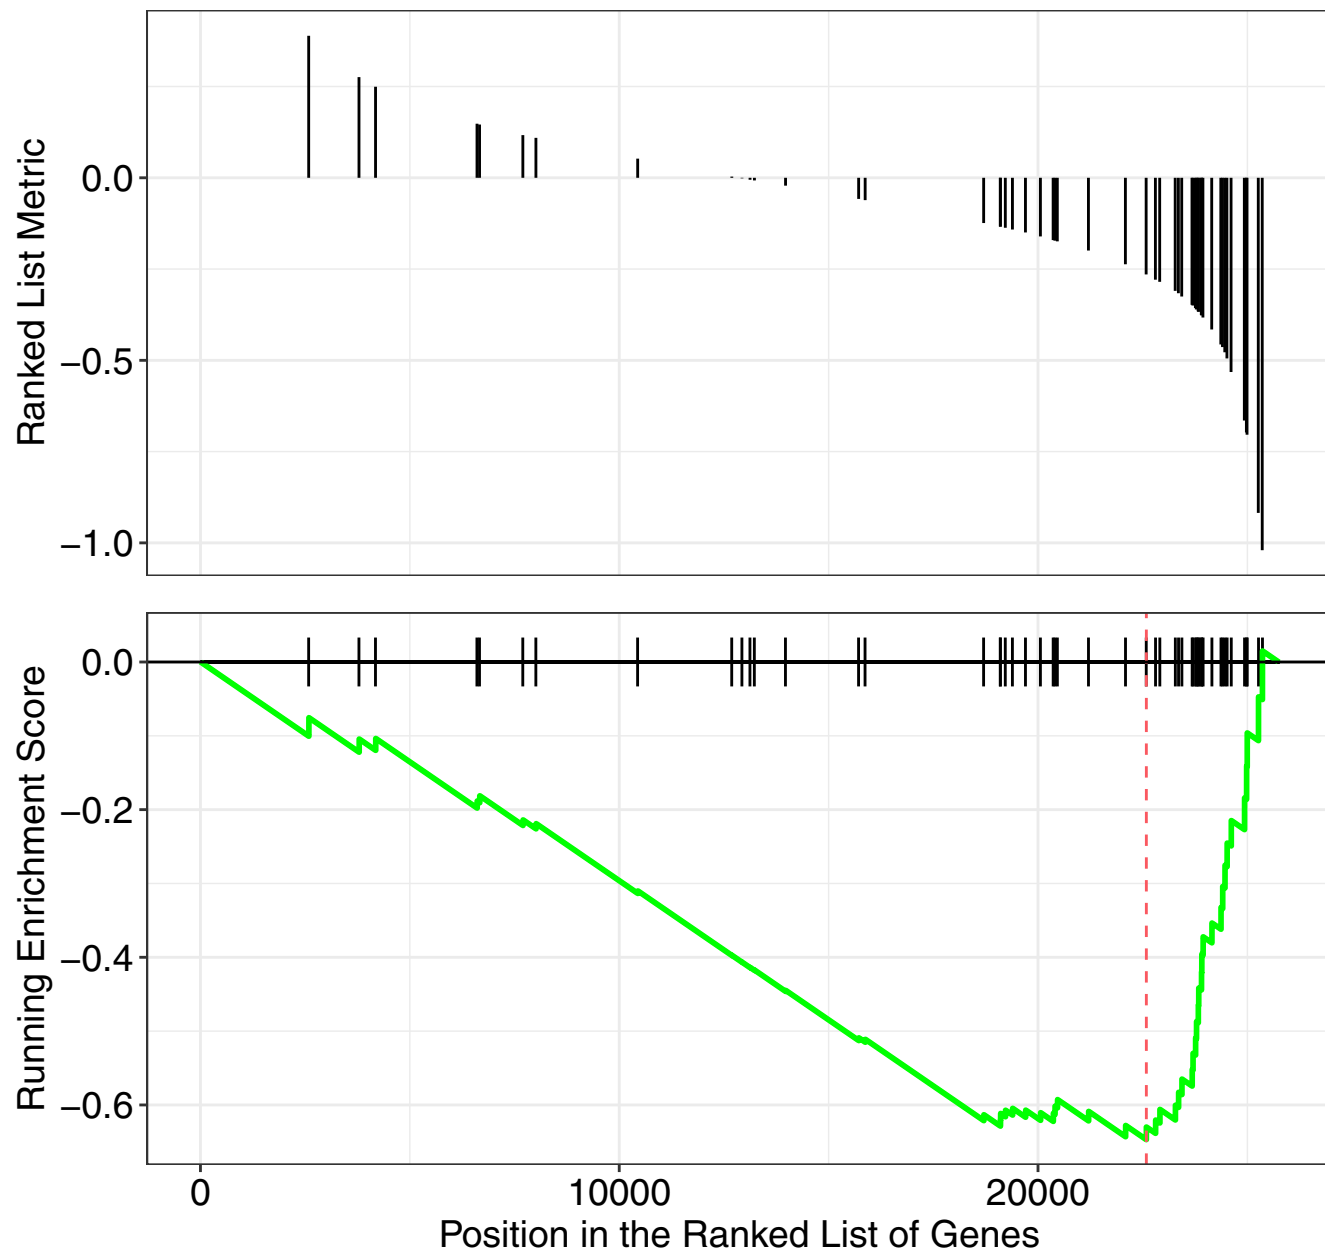

### tubulin binding

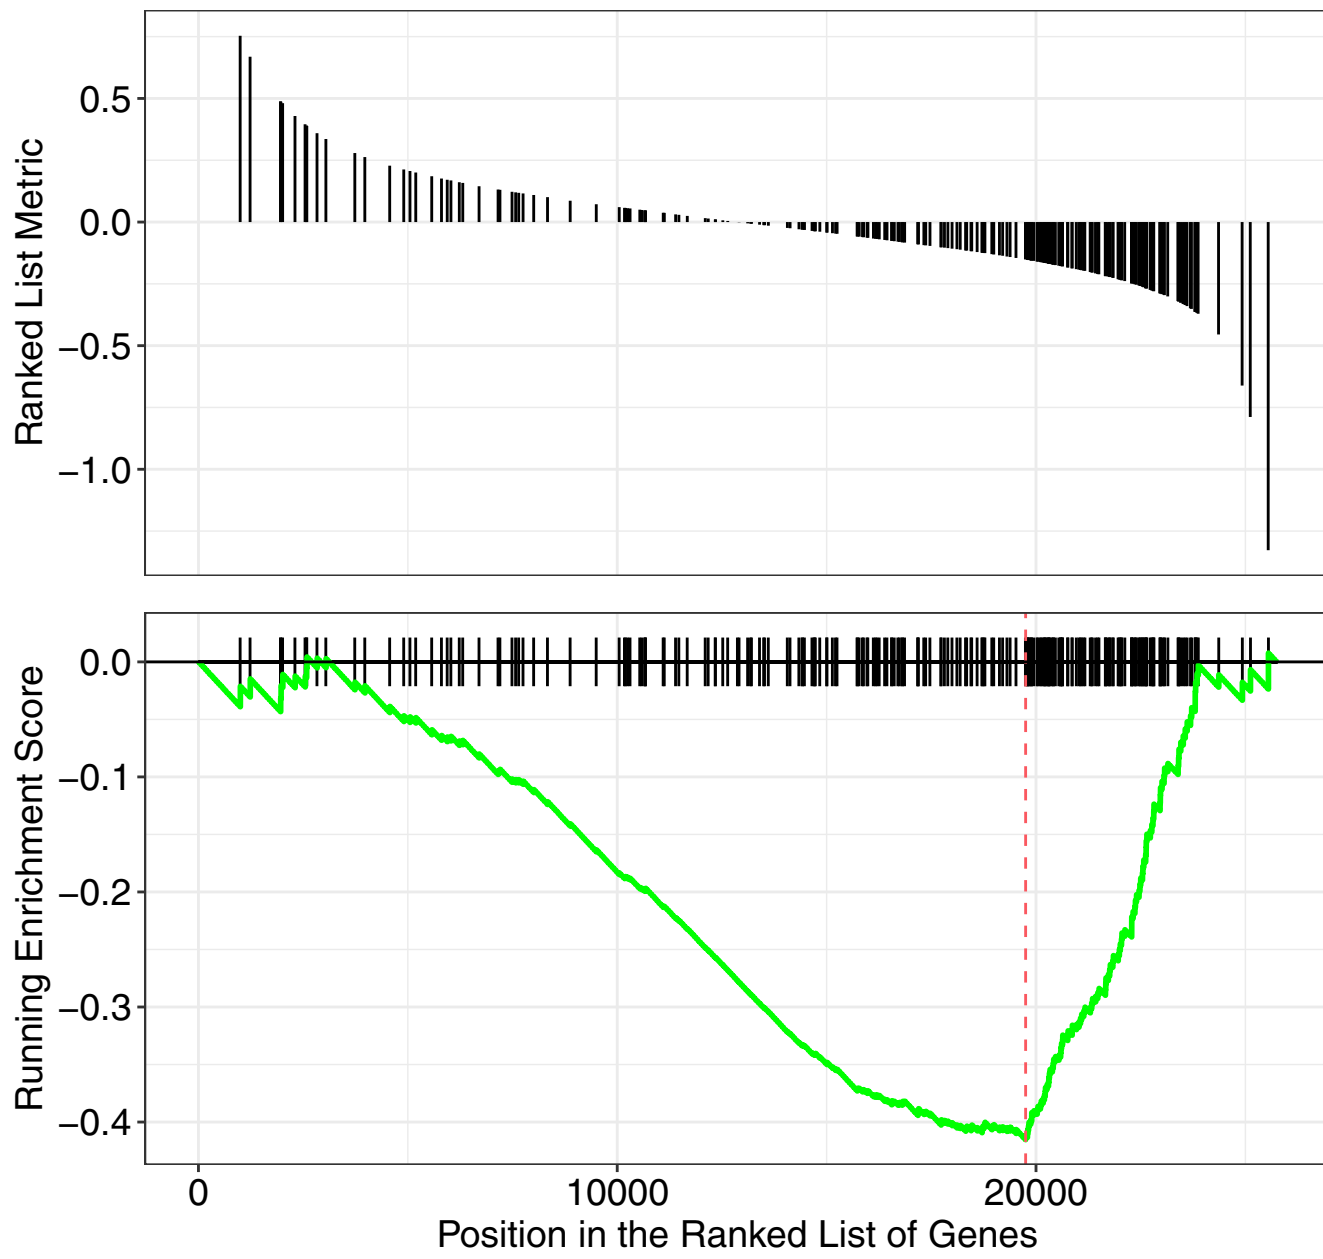

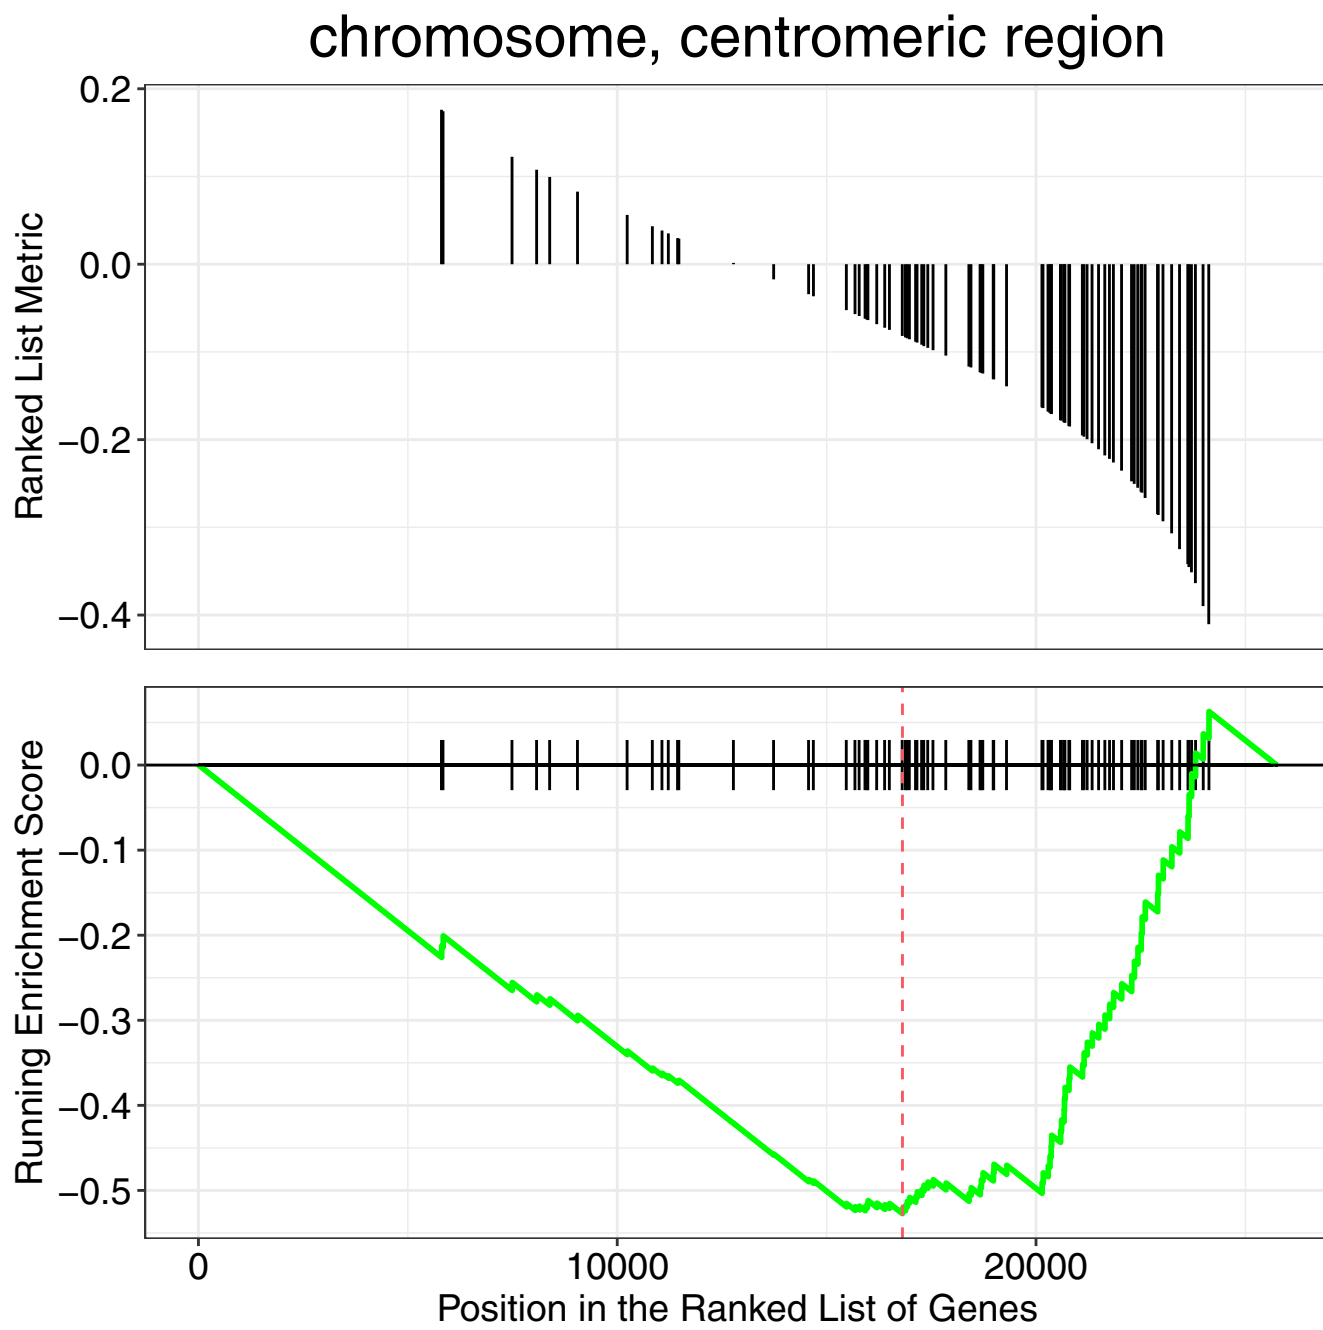

### histone binding

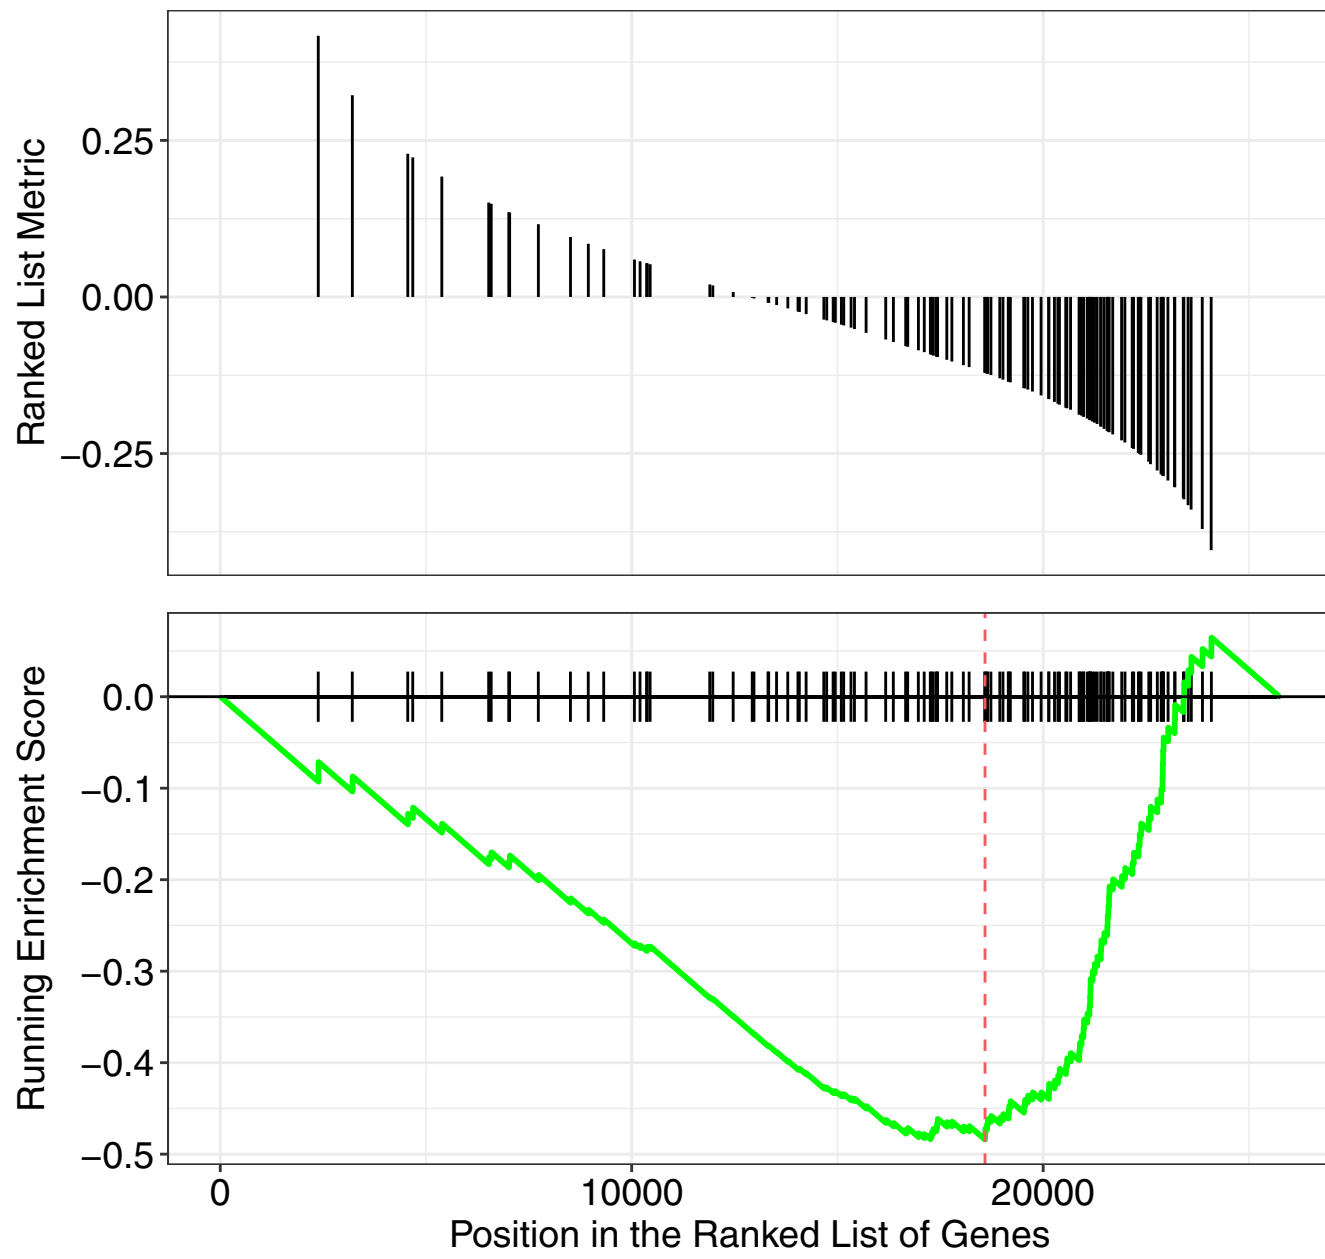

### microtubule binding

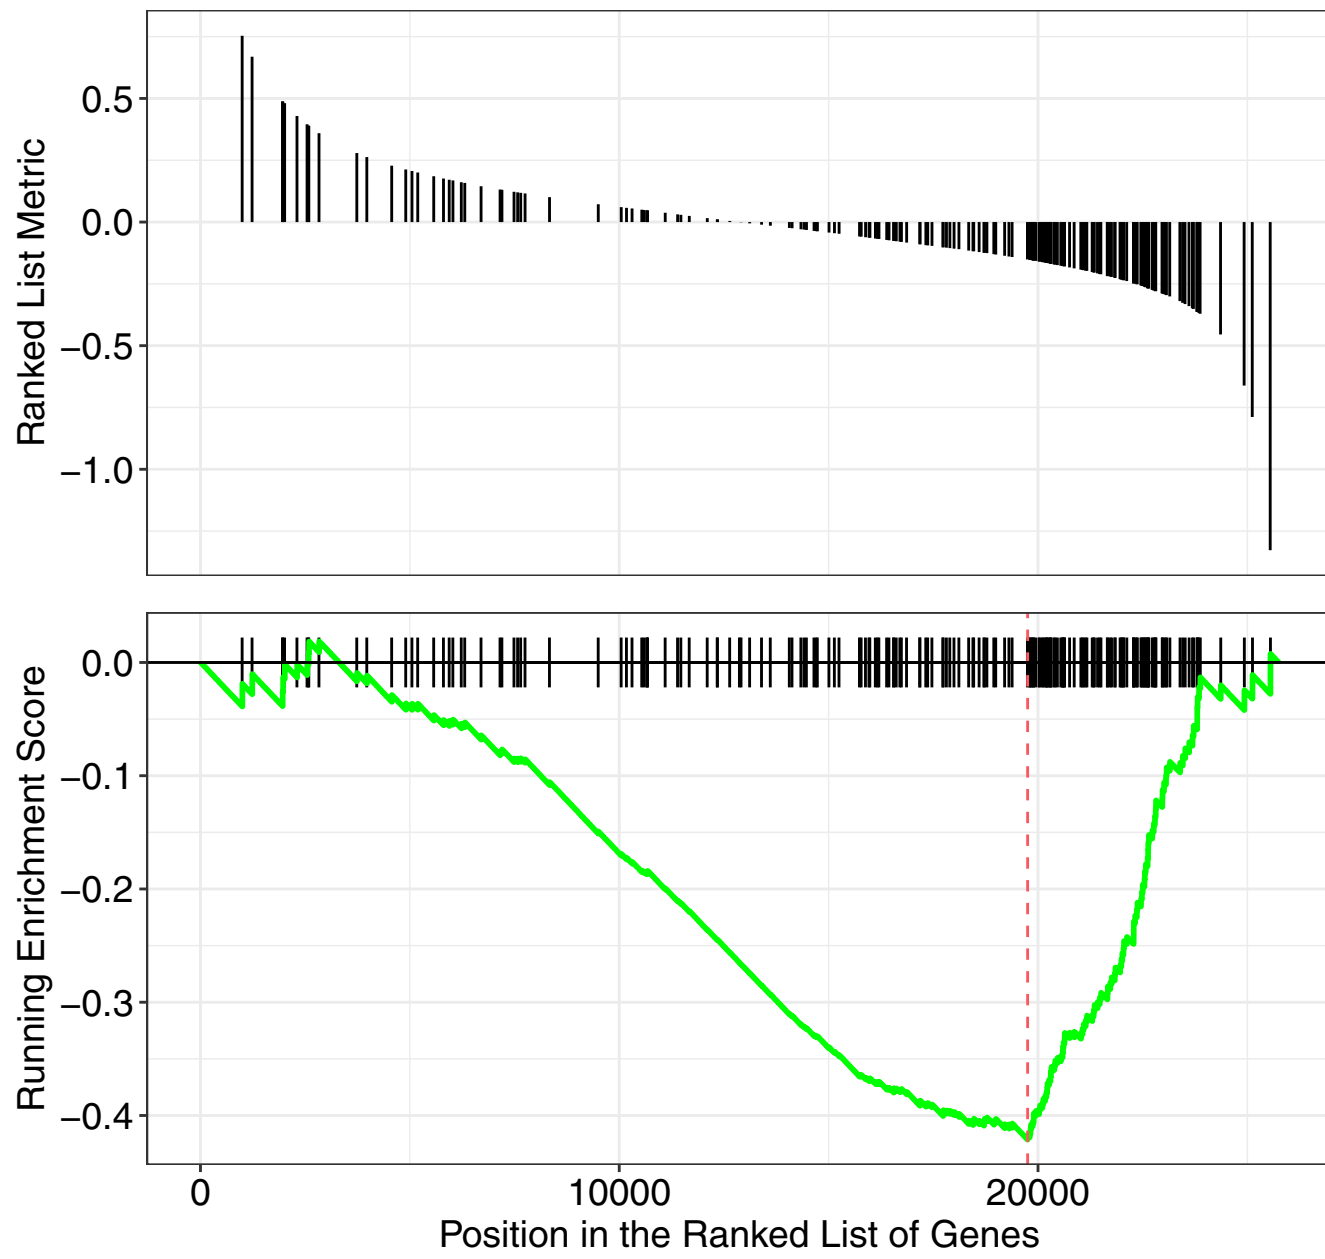

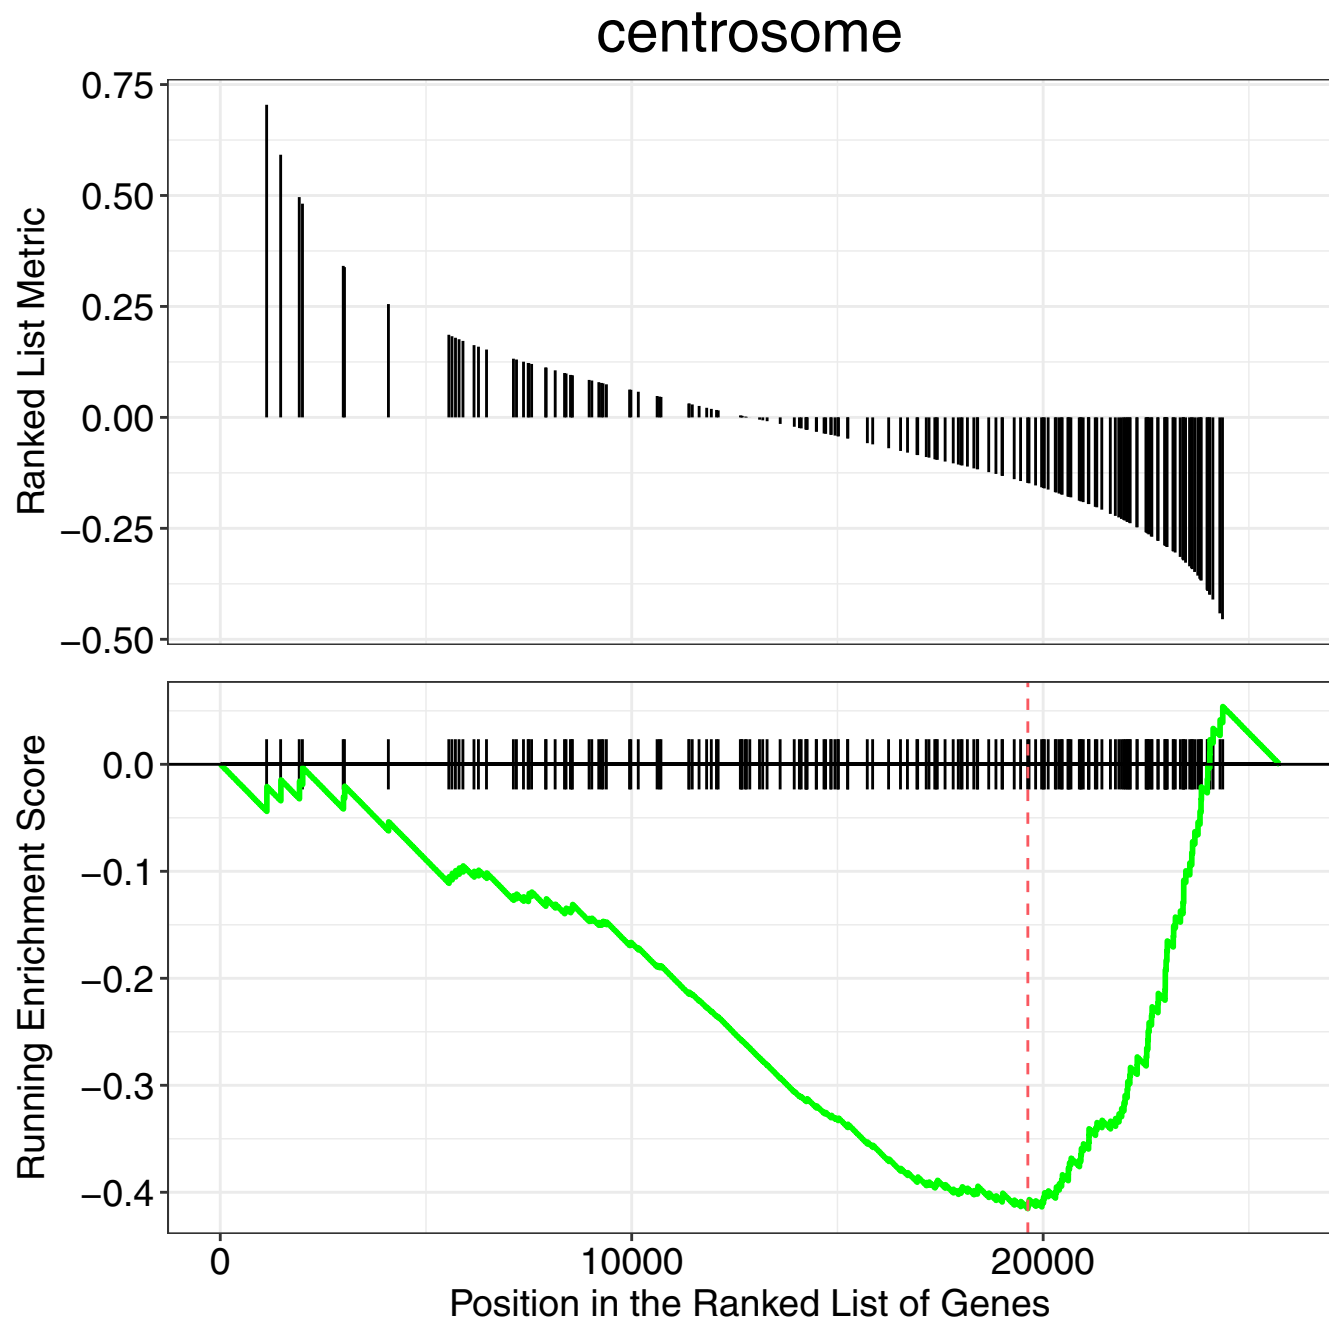

### centrosome duplication

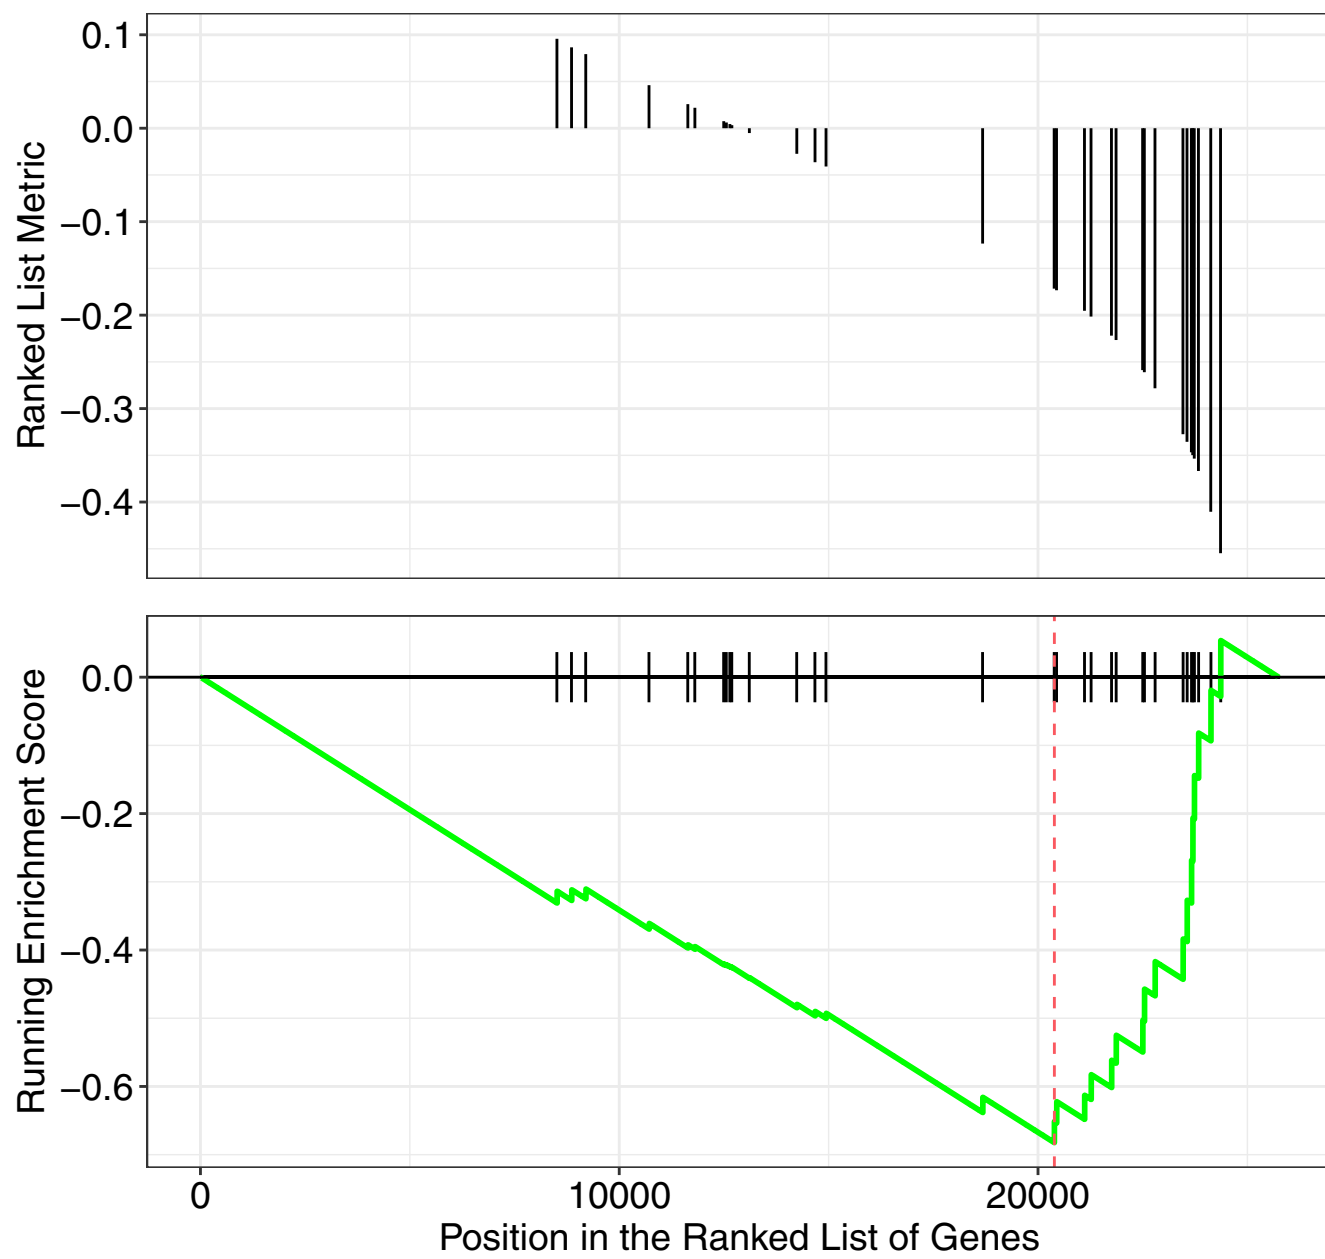



## RNA splicing

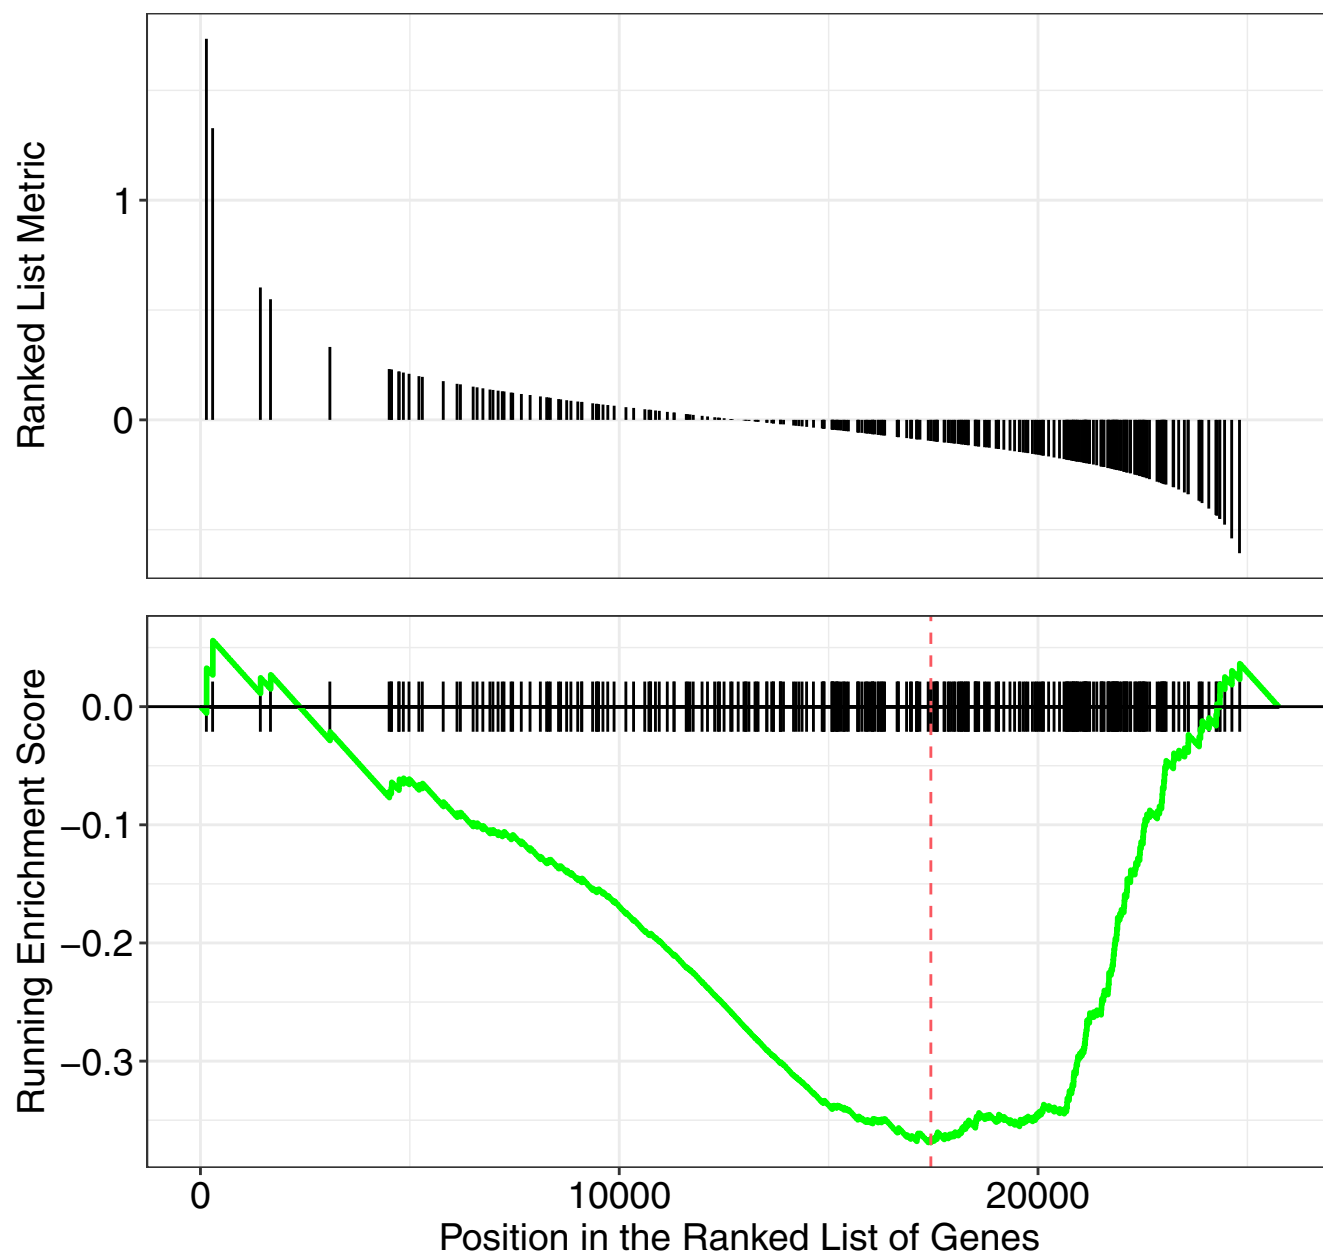

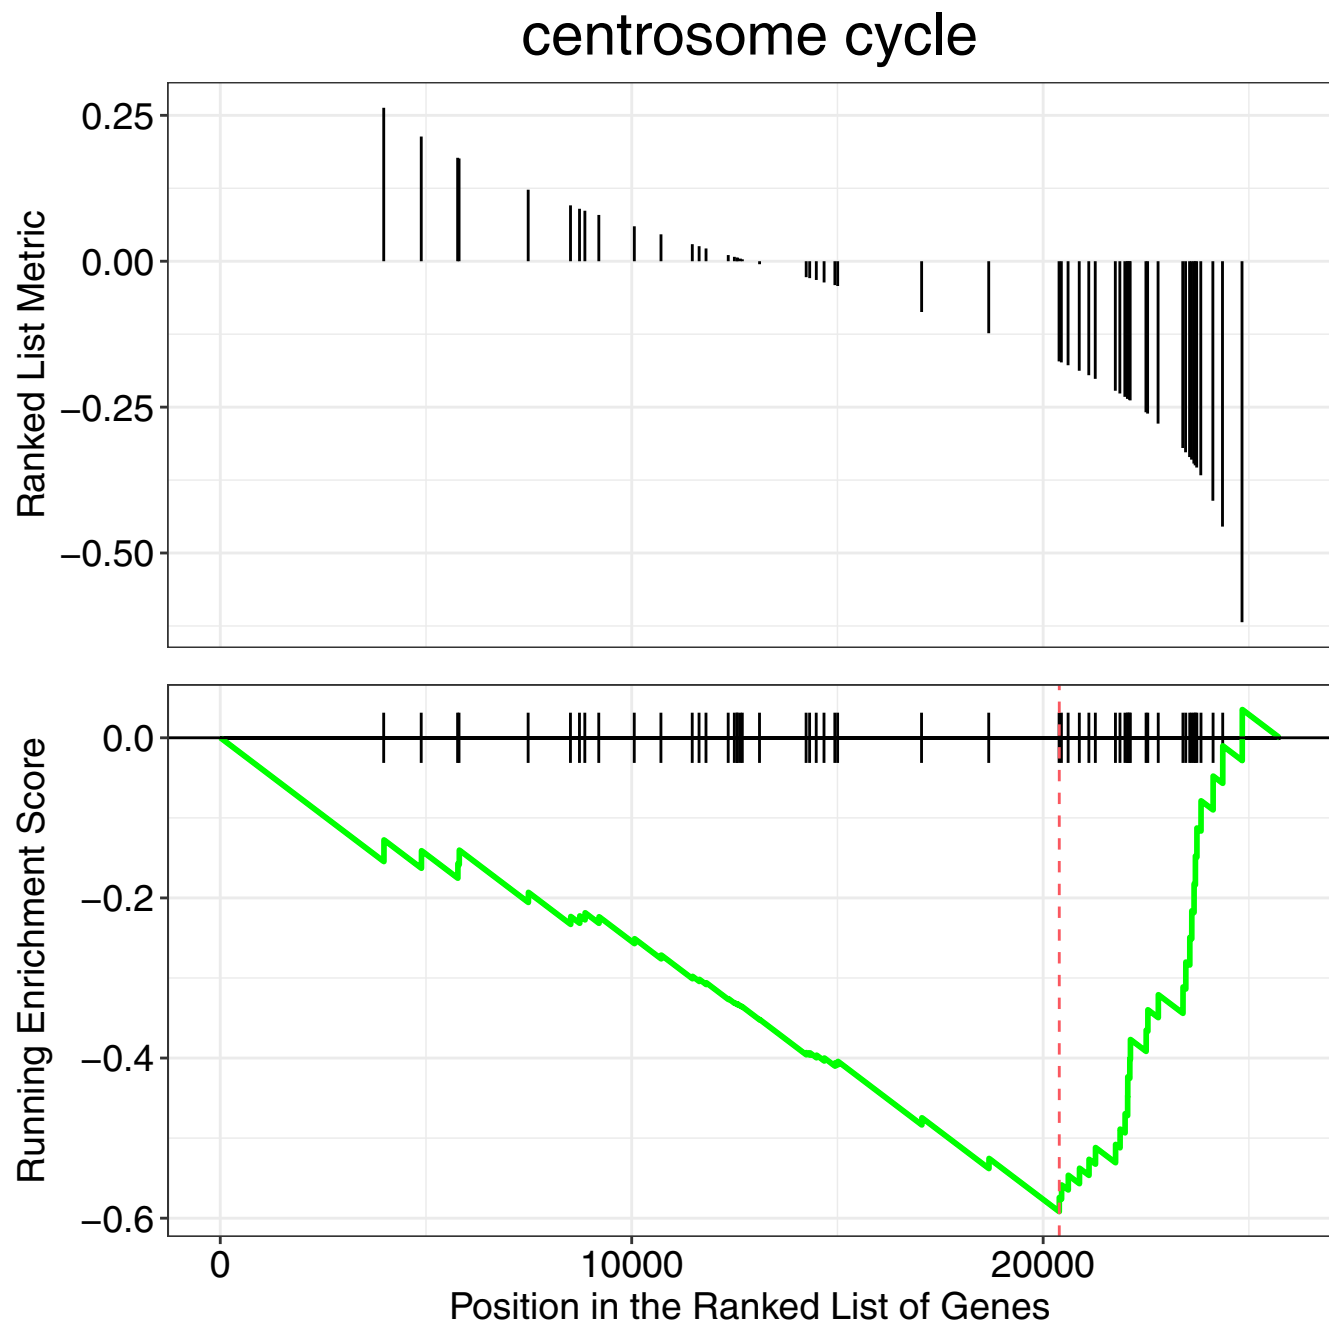

### microtubule cytoskeleton organization

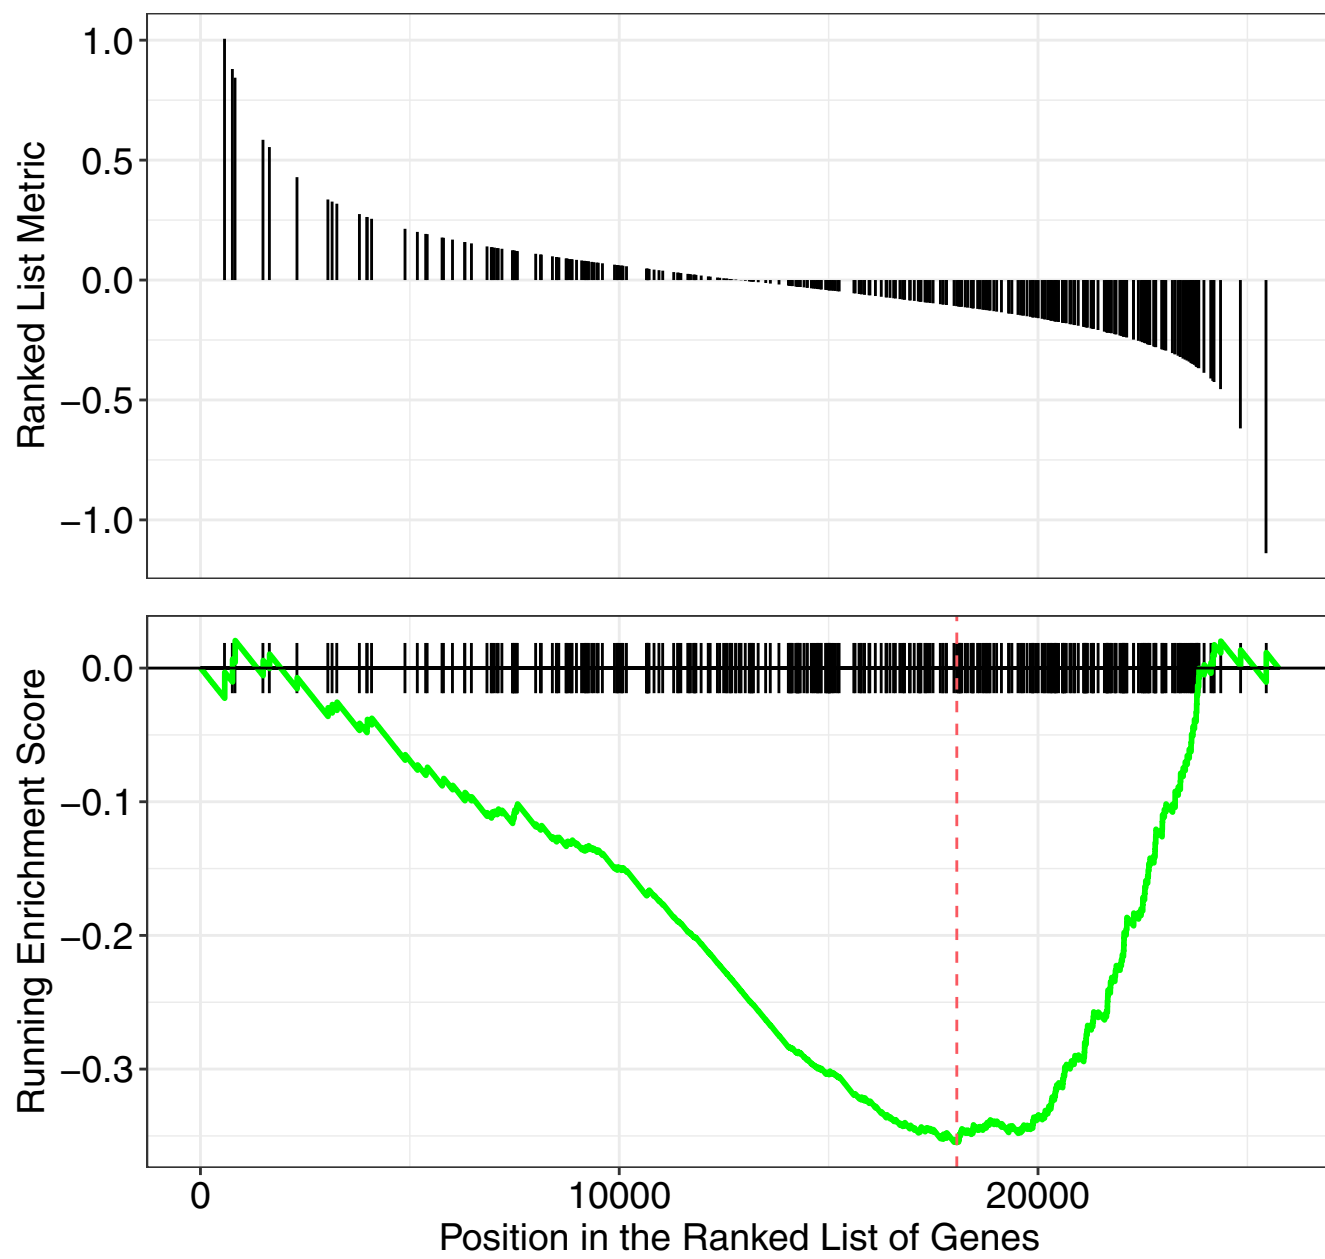

## DNA helicase activity

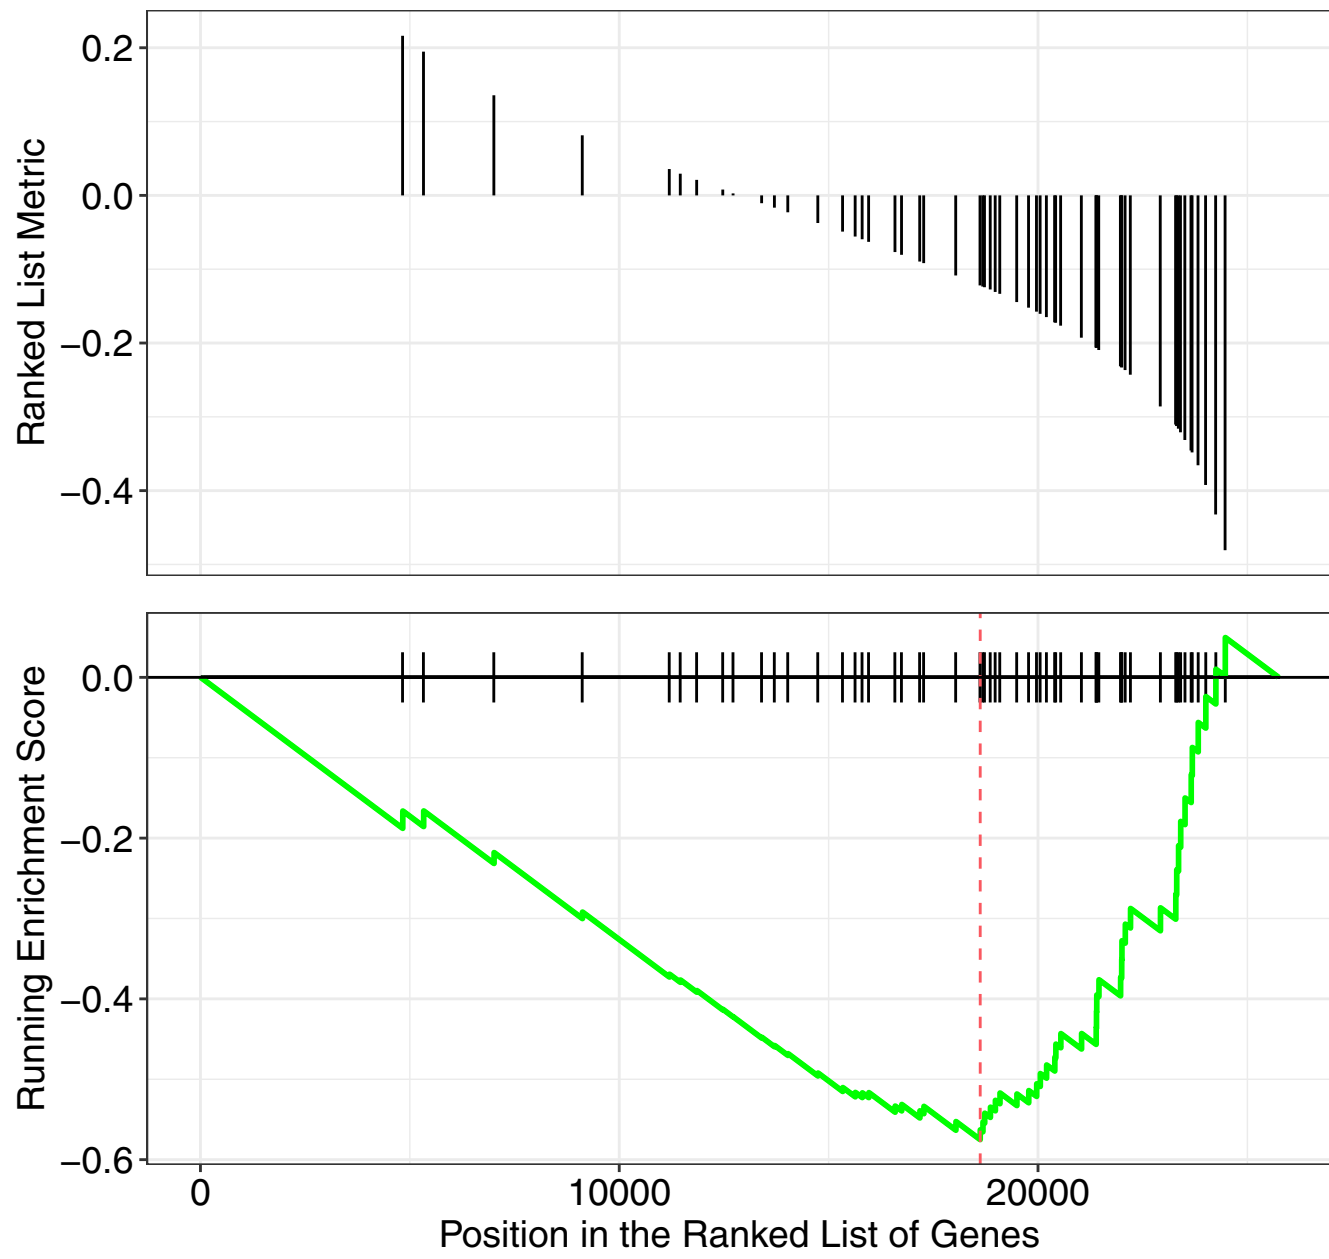

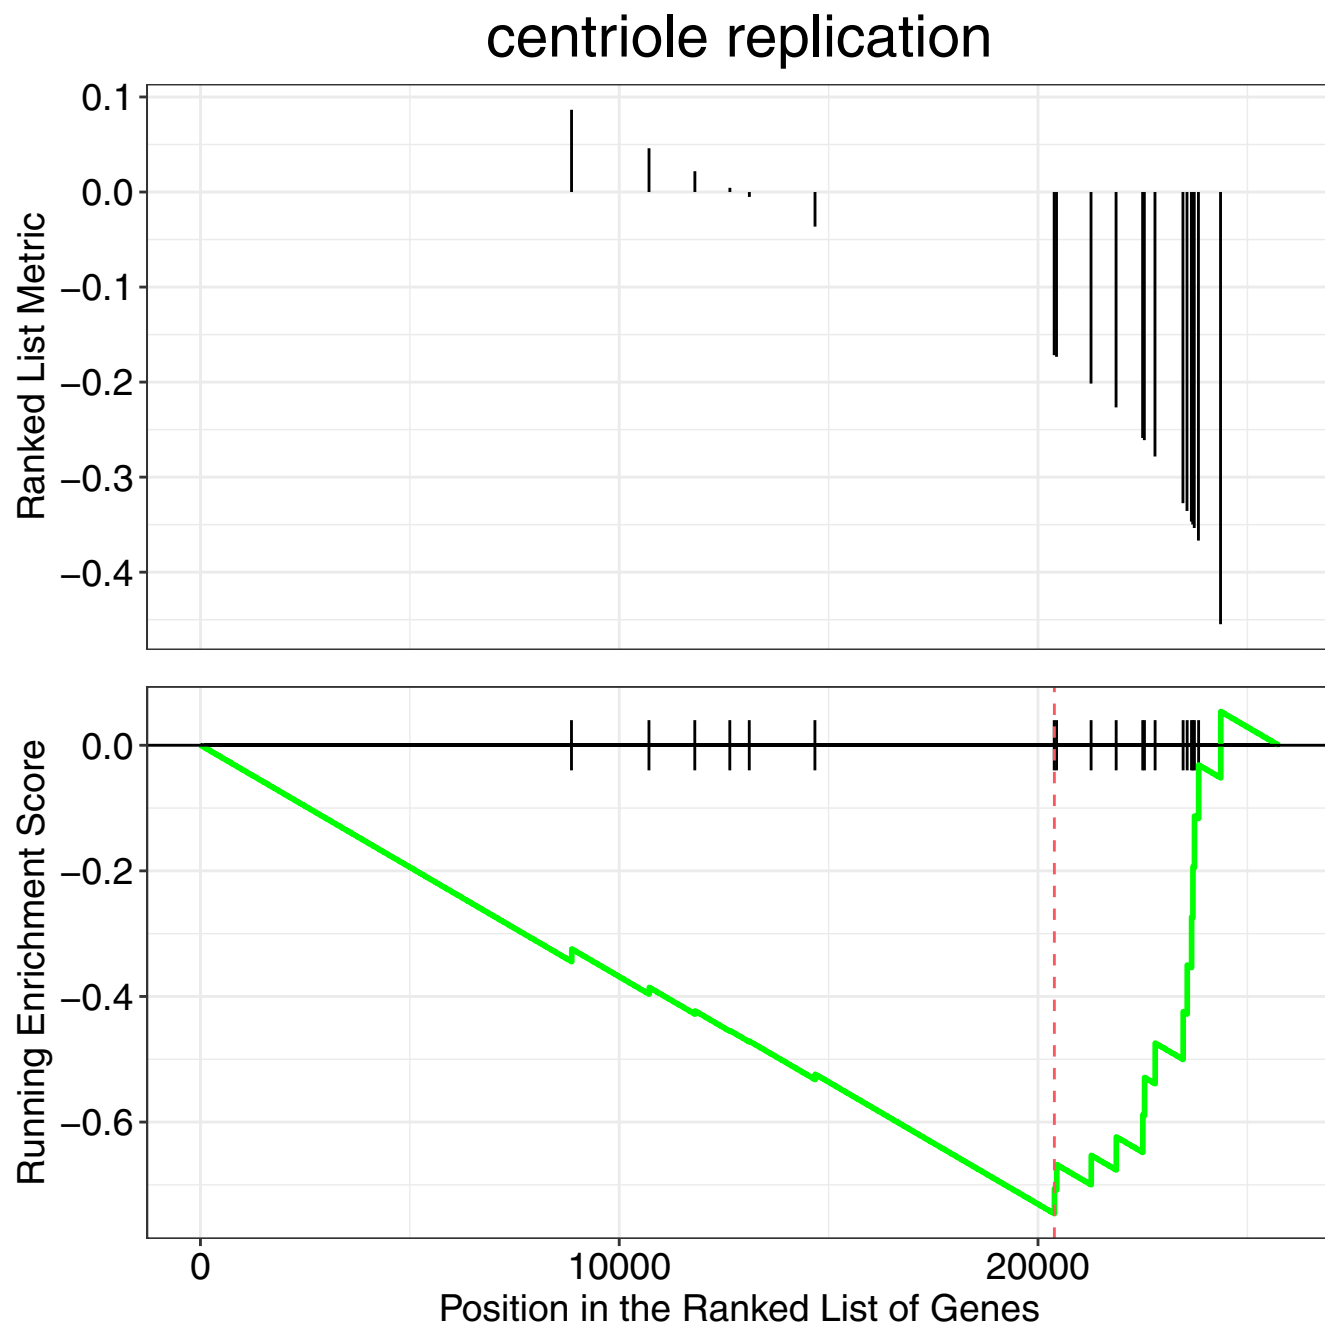

### microtubule organizing center organization

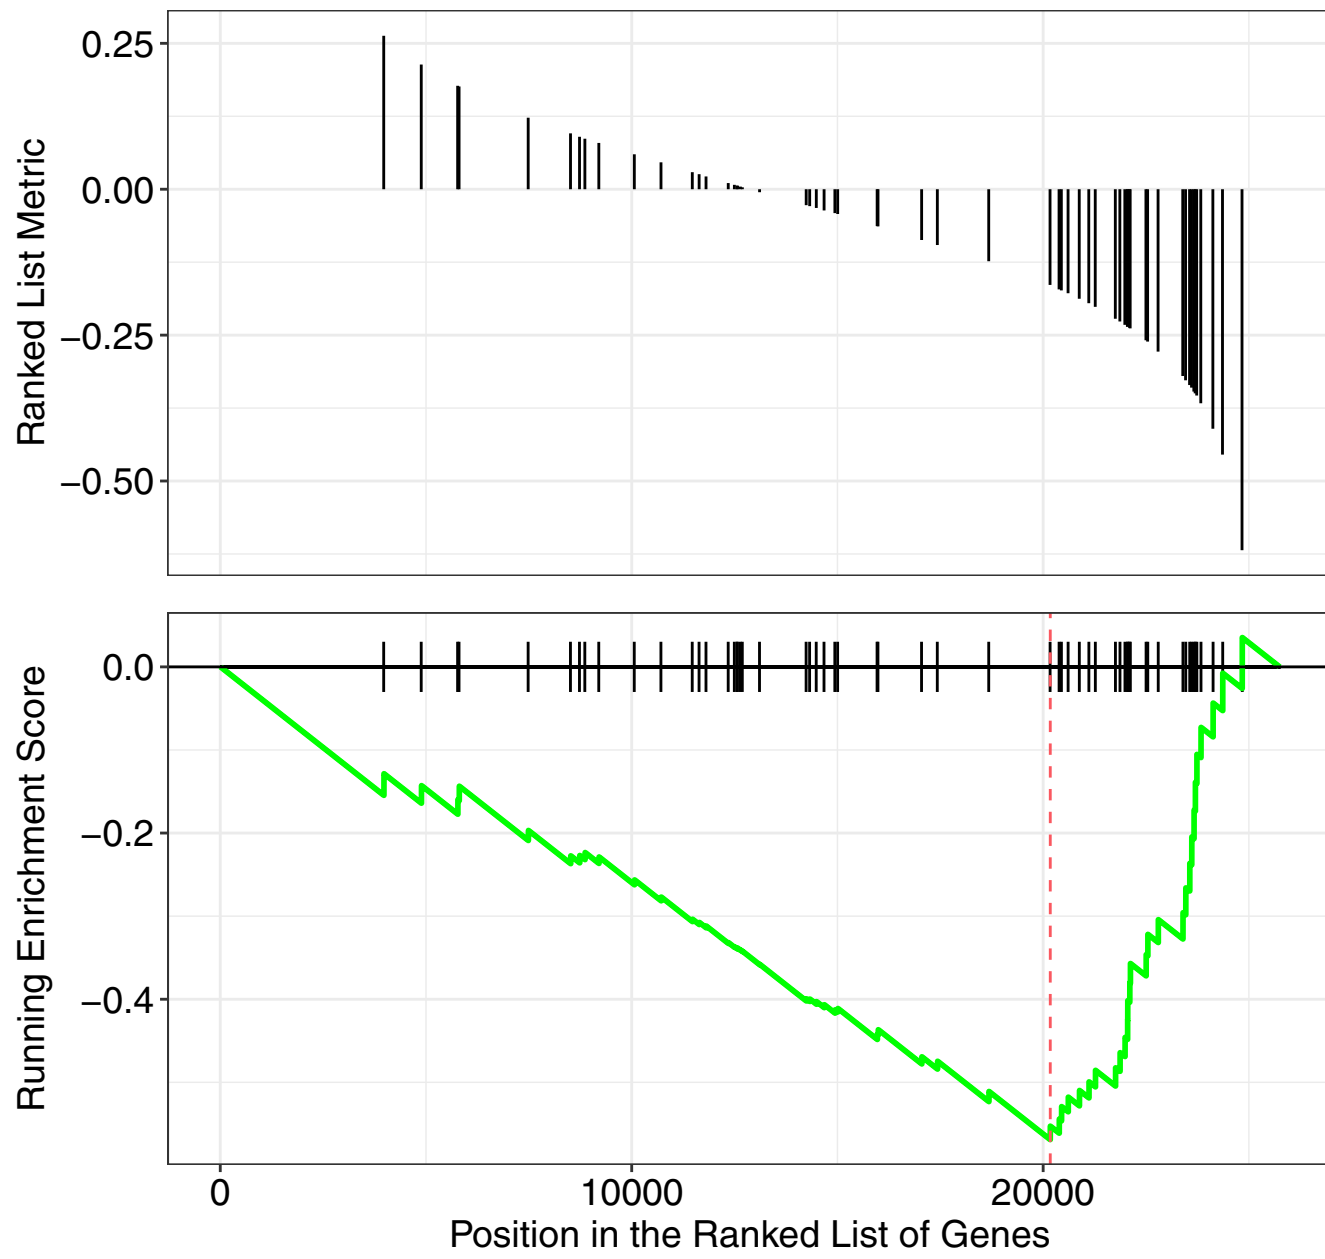

### microtubule organizing center

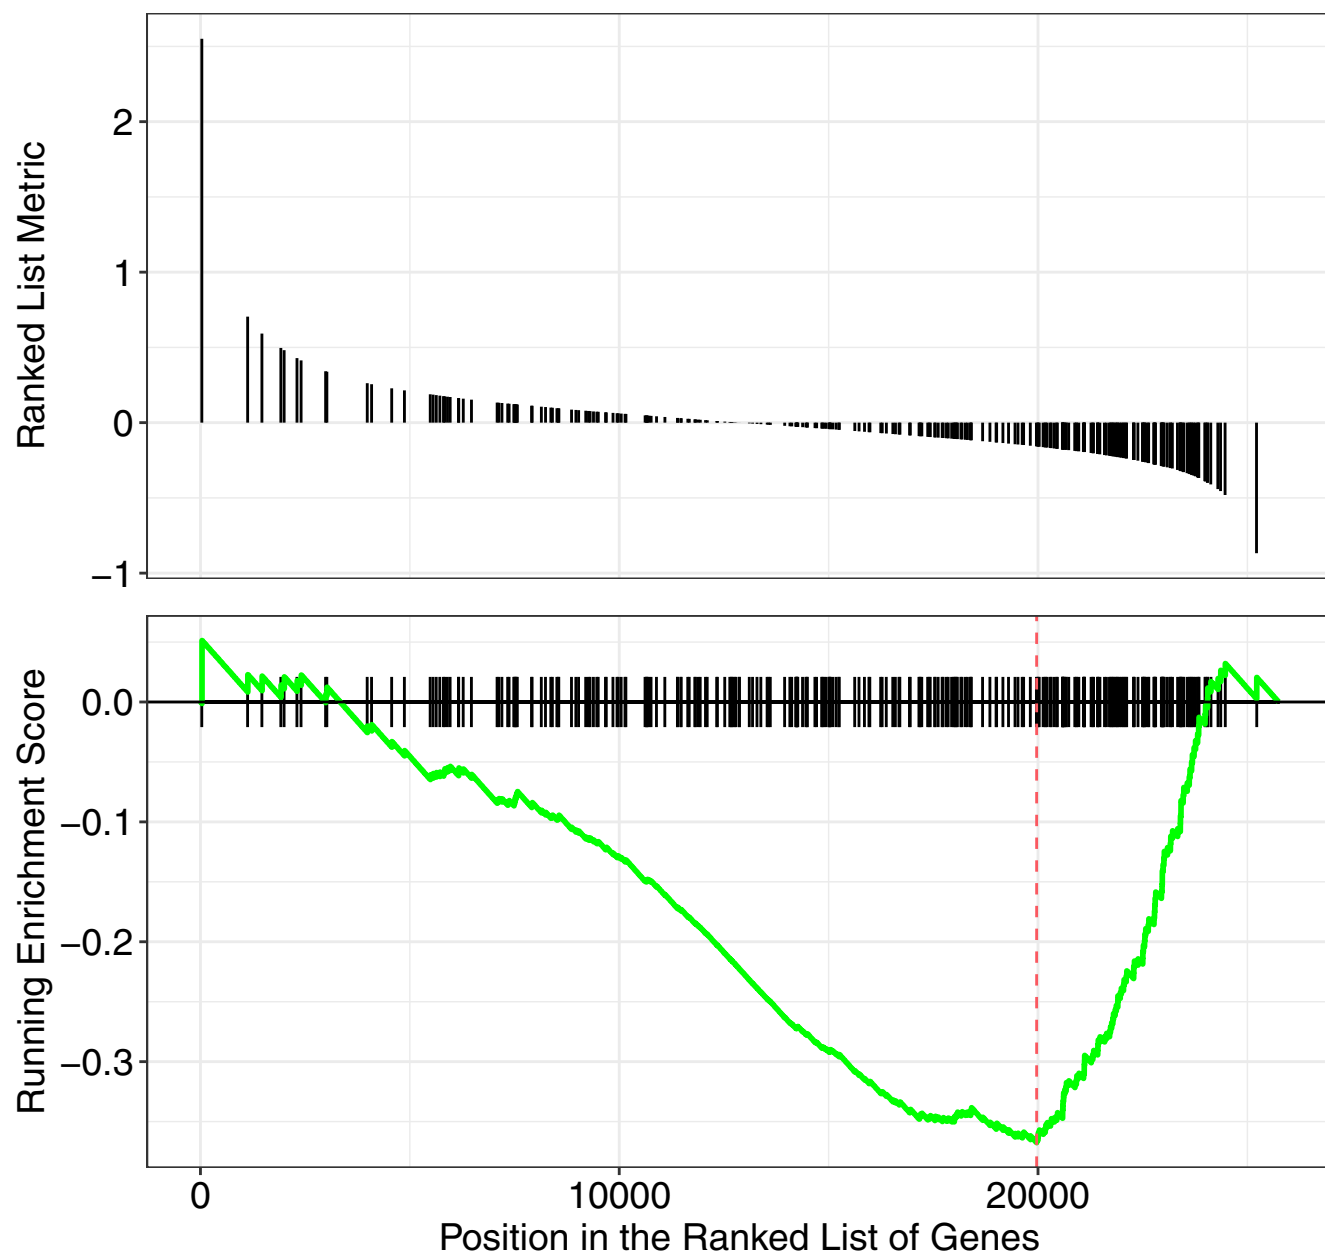

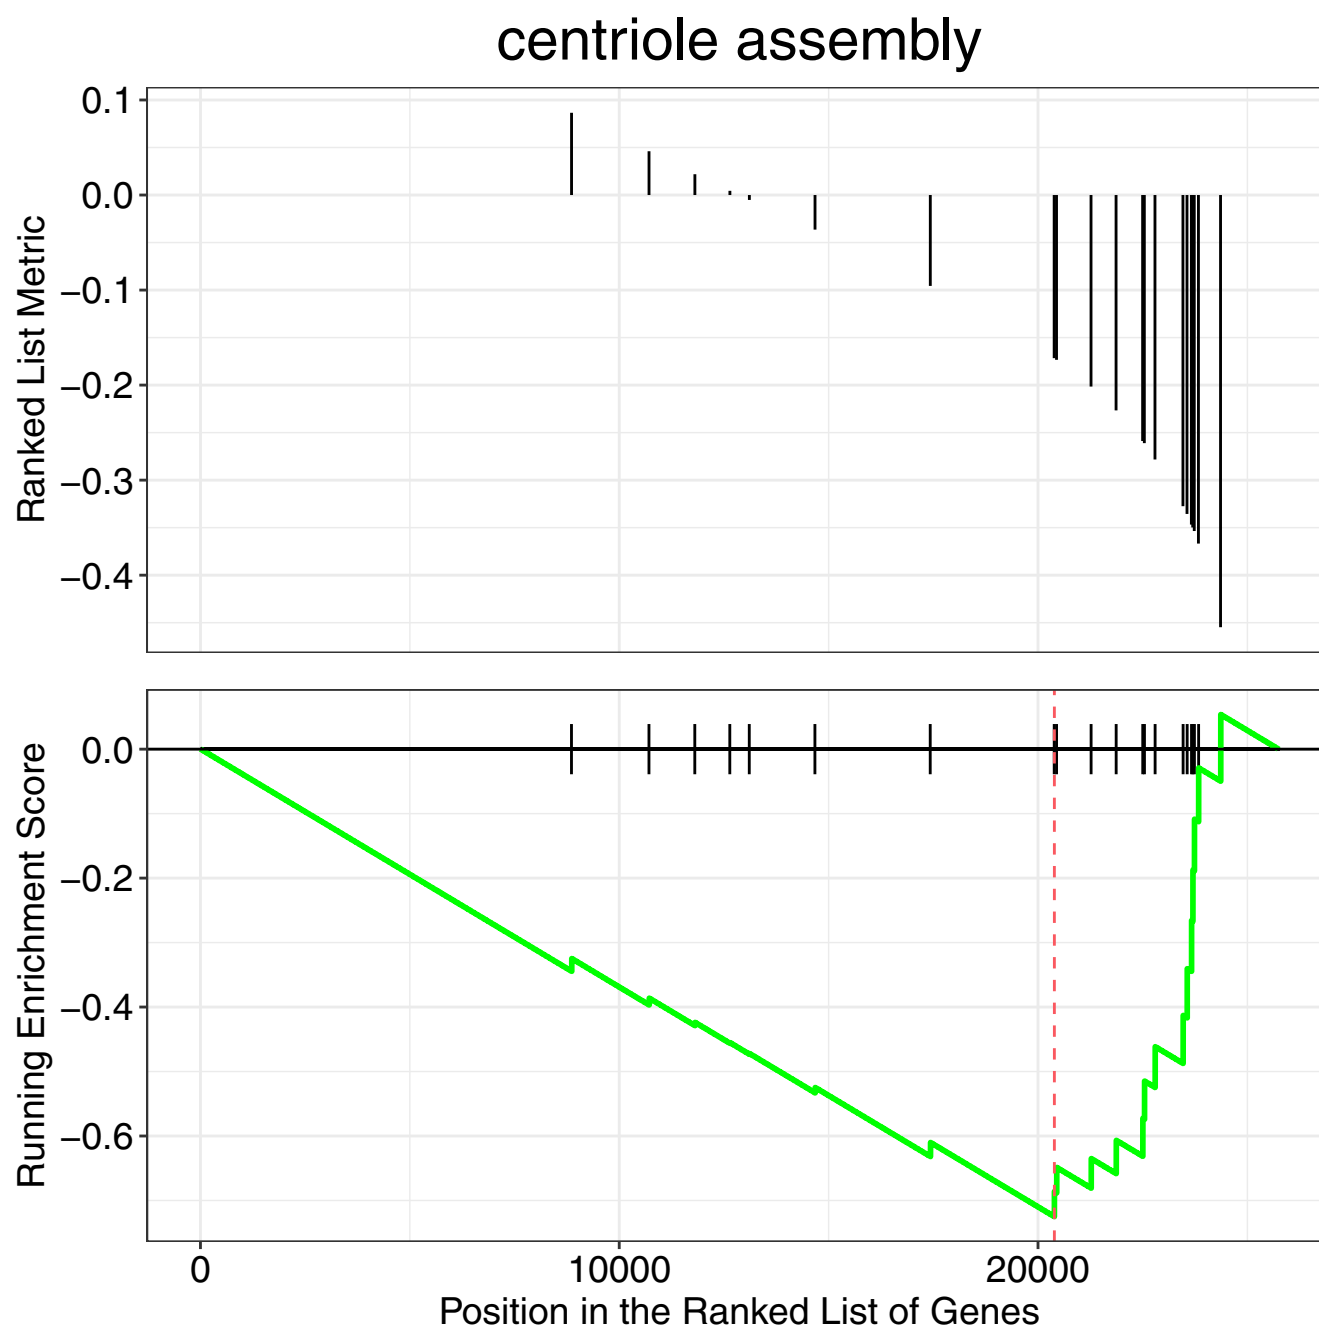

**Fig. S7. Enrichment plots of Gene set enrichment analysis (GSEA) of differentially expressed genes in *alx1;alx3* crispants.** Running score plot and pre-ranked list of all suppressed GSEA terms shown in *alx1;alx3* crispants.



### circadian regulation of gene expression

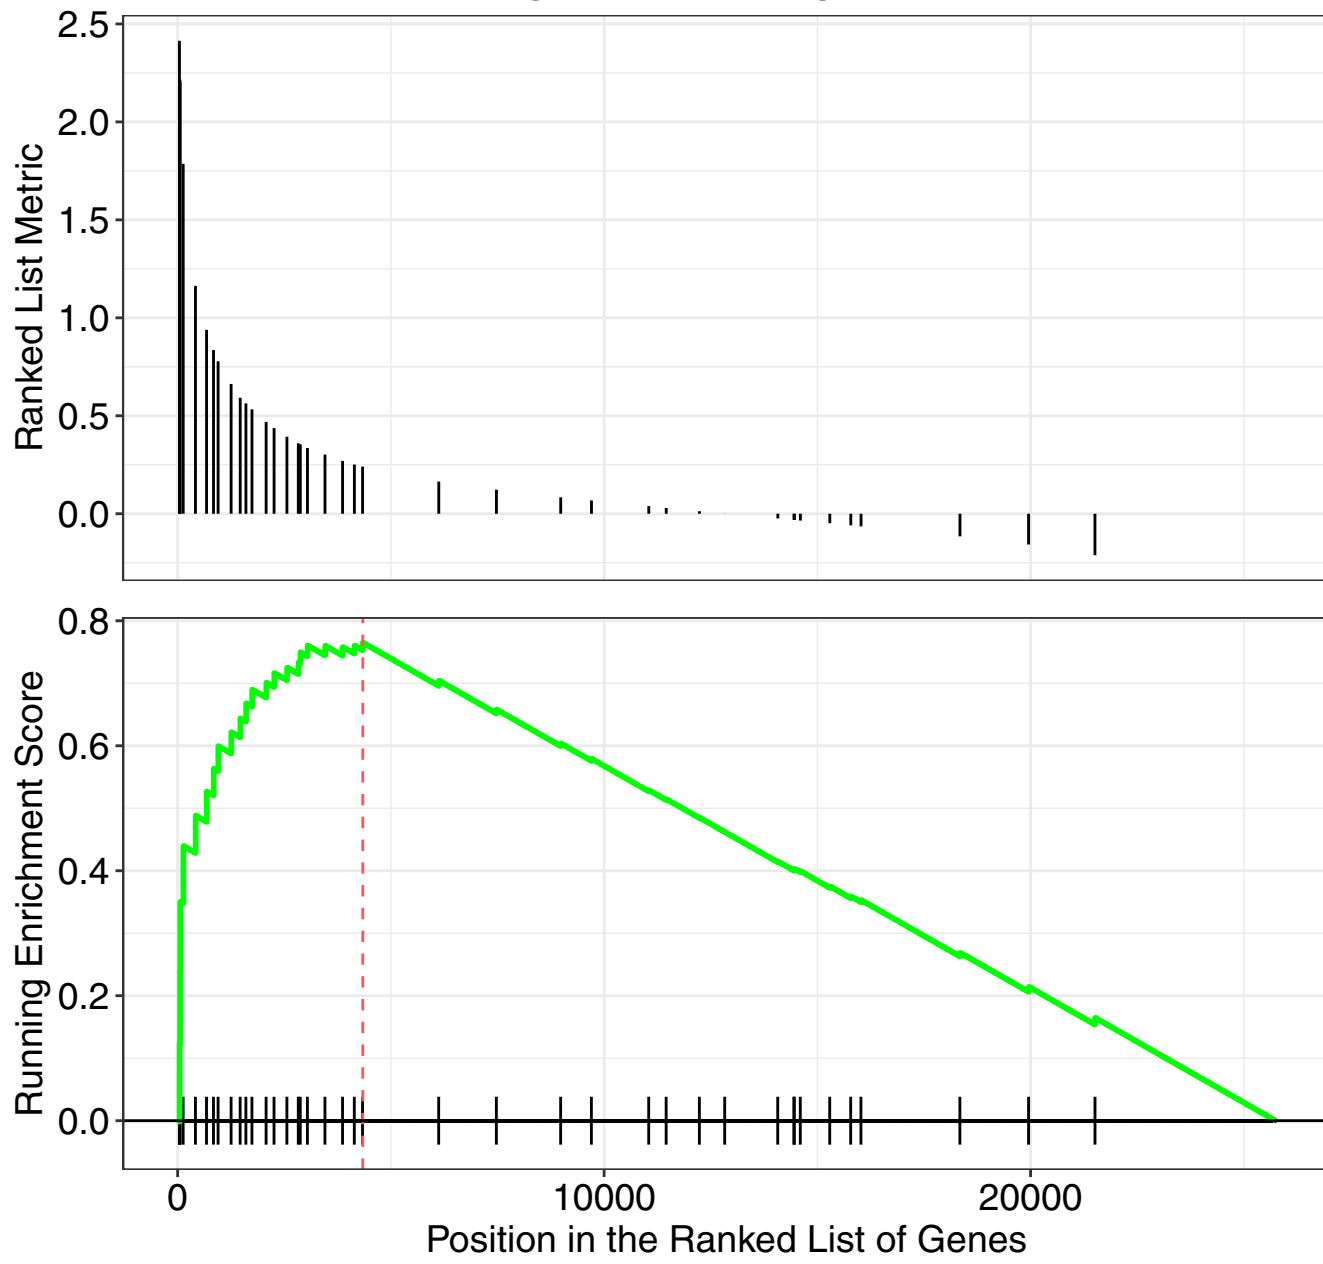

### response to xenobiotic stimulus

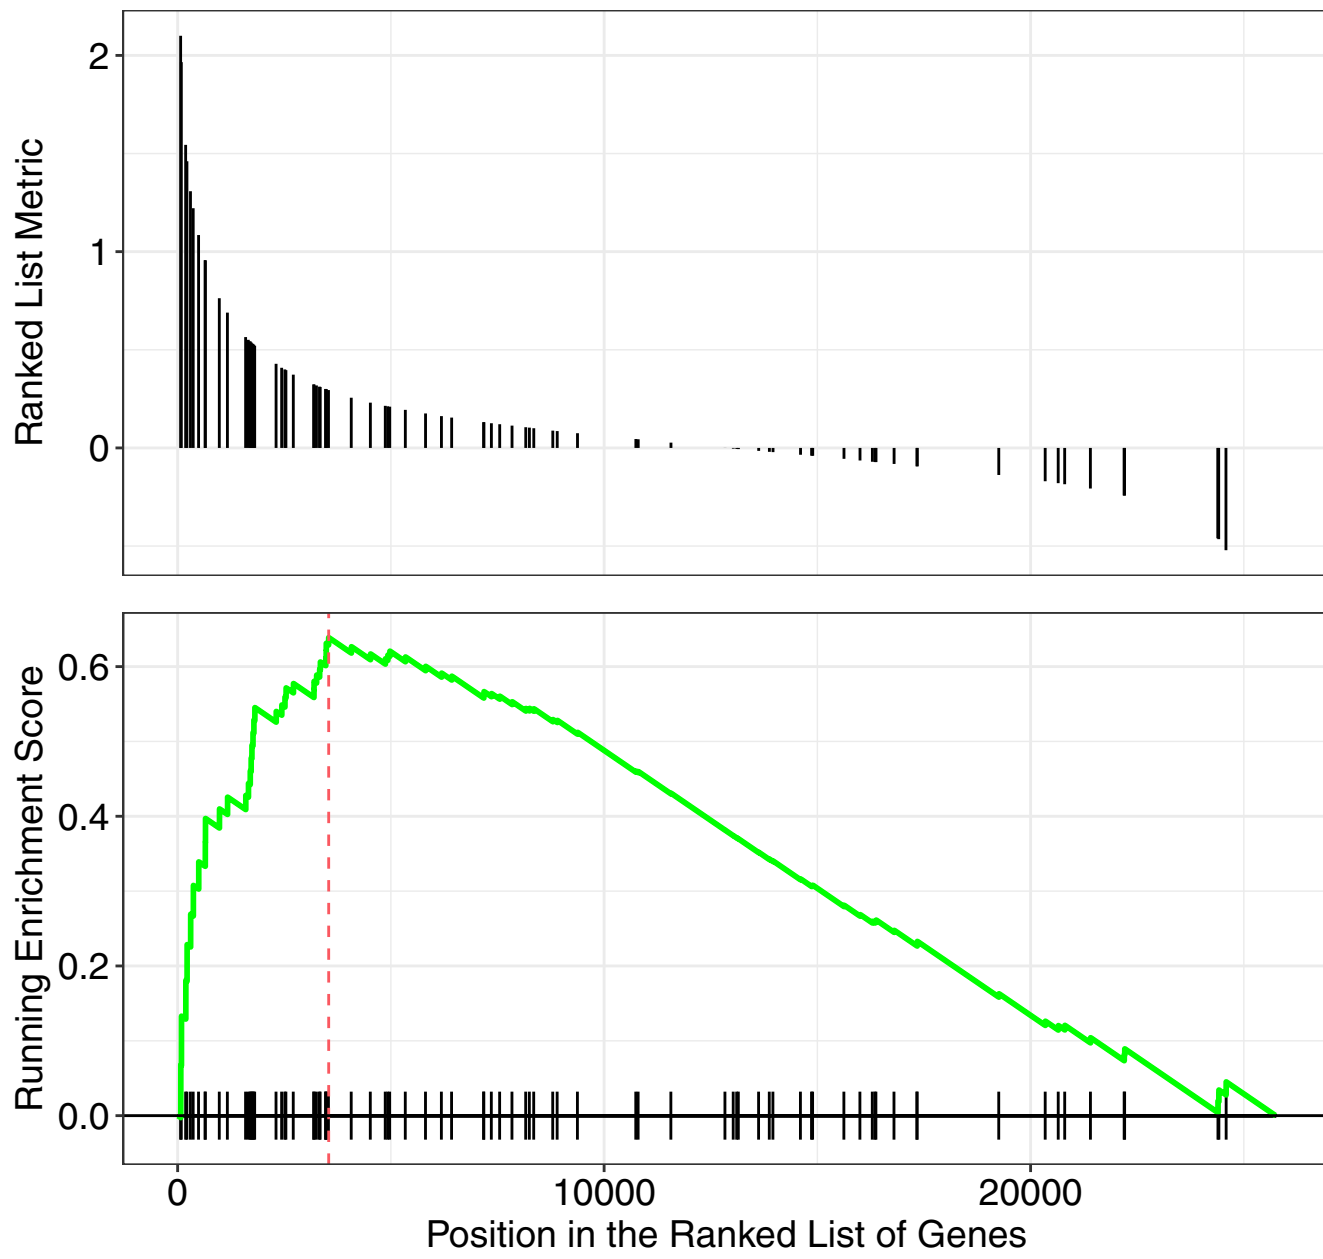

### monooxygenase activity

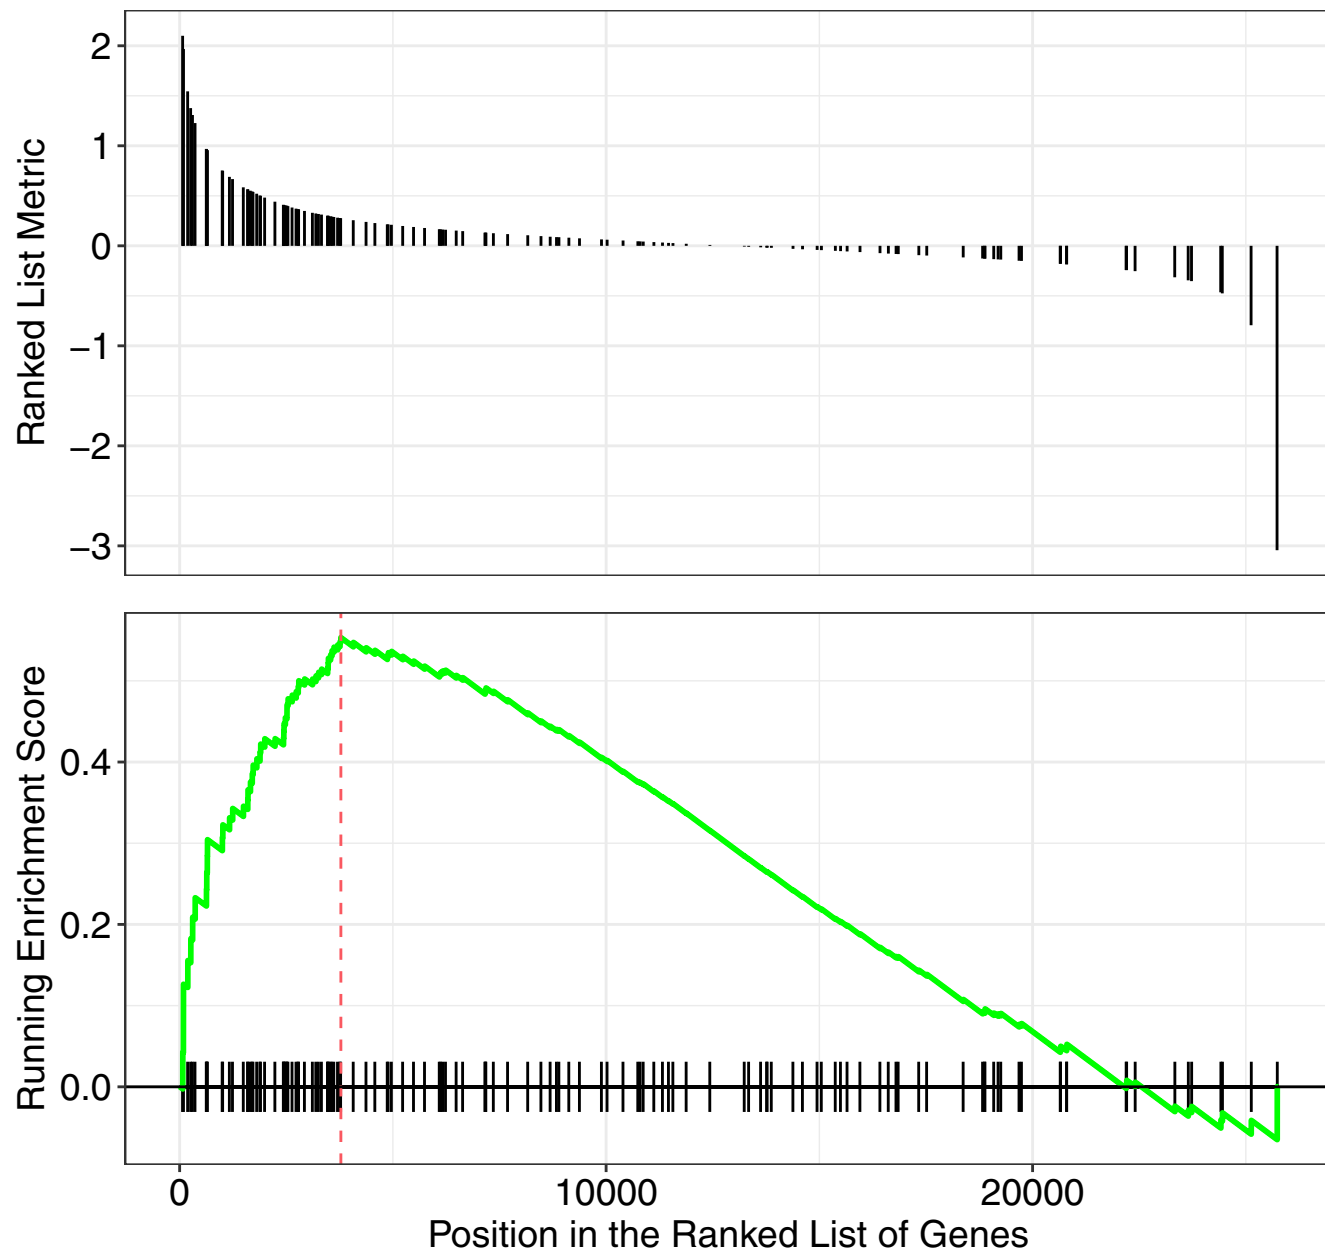

### tetrapyrrole binding

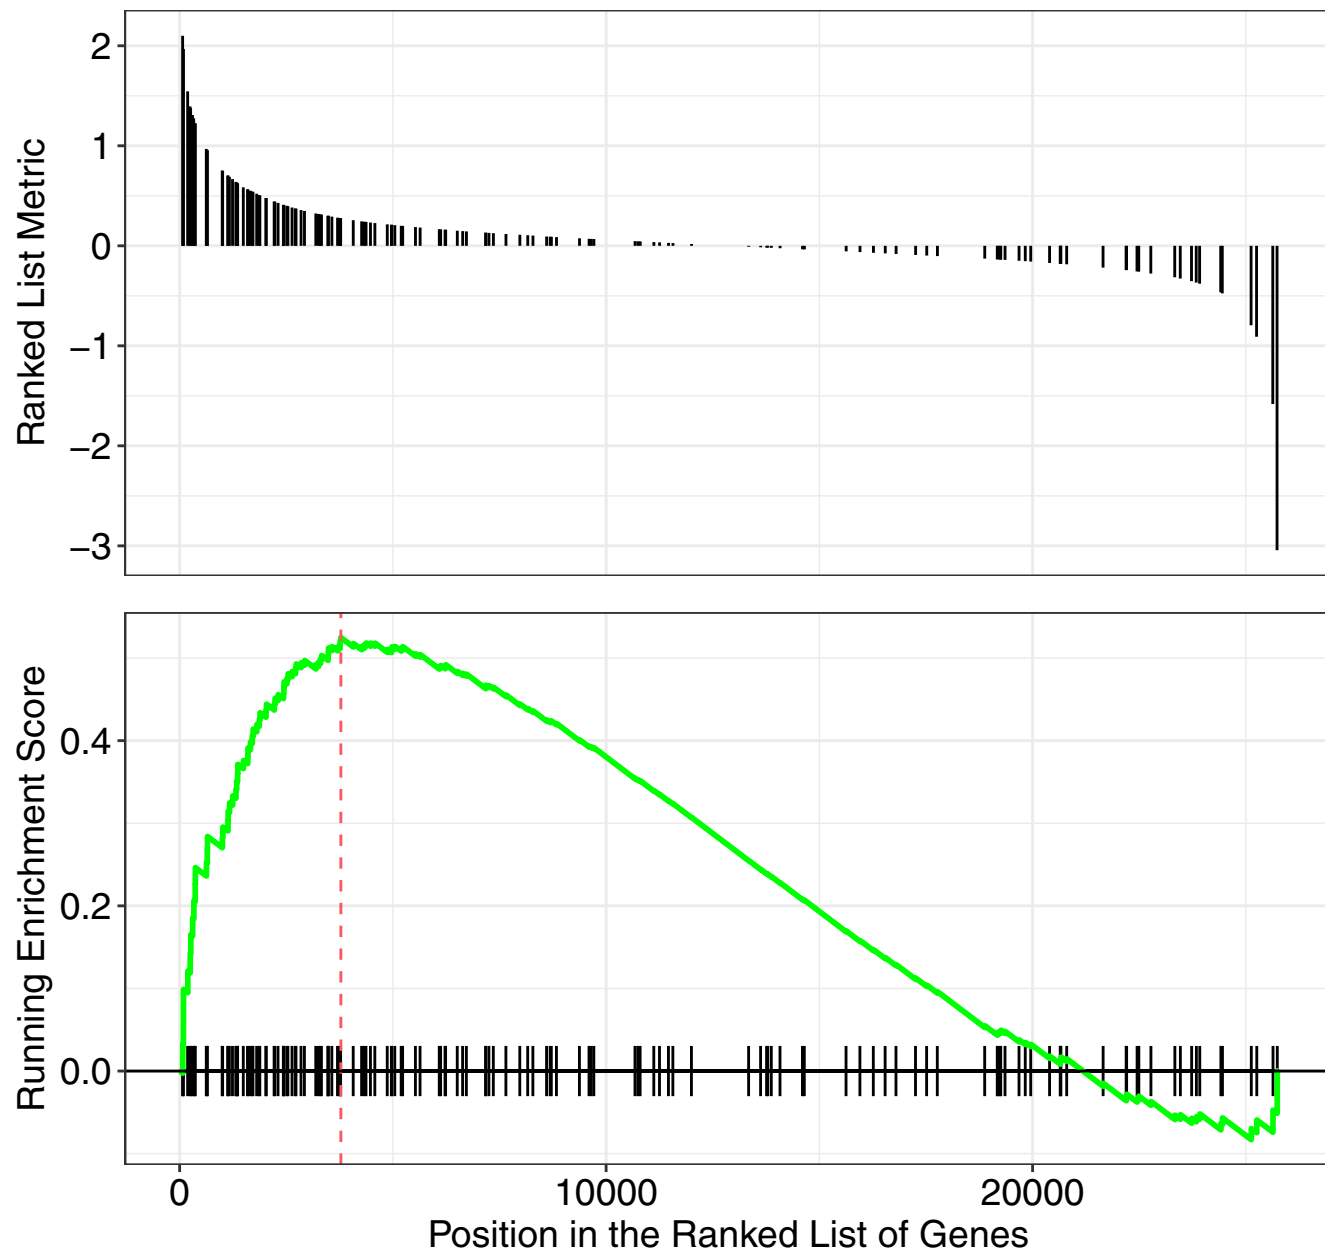

### iron ion binding

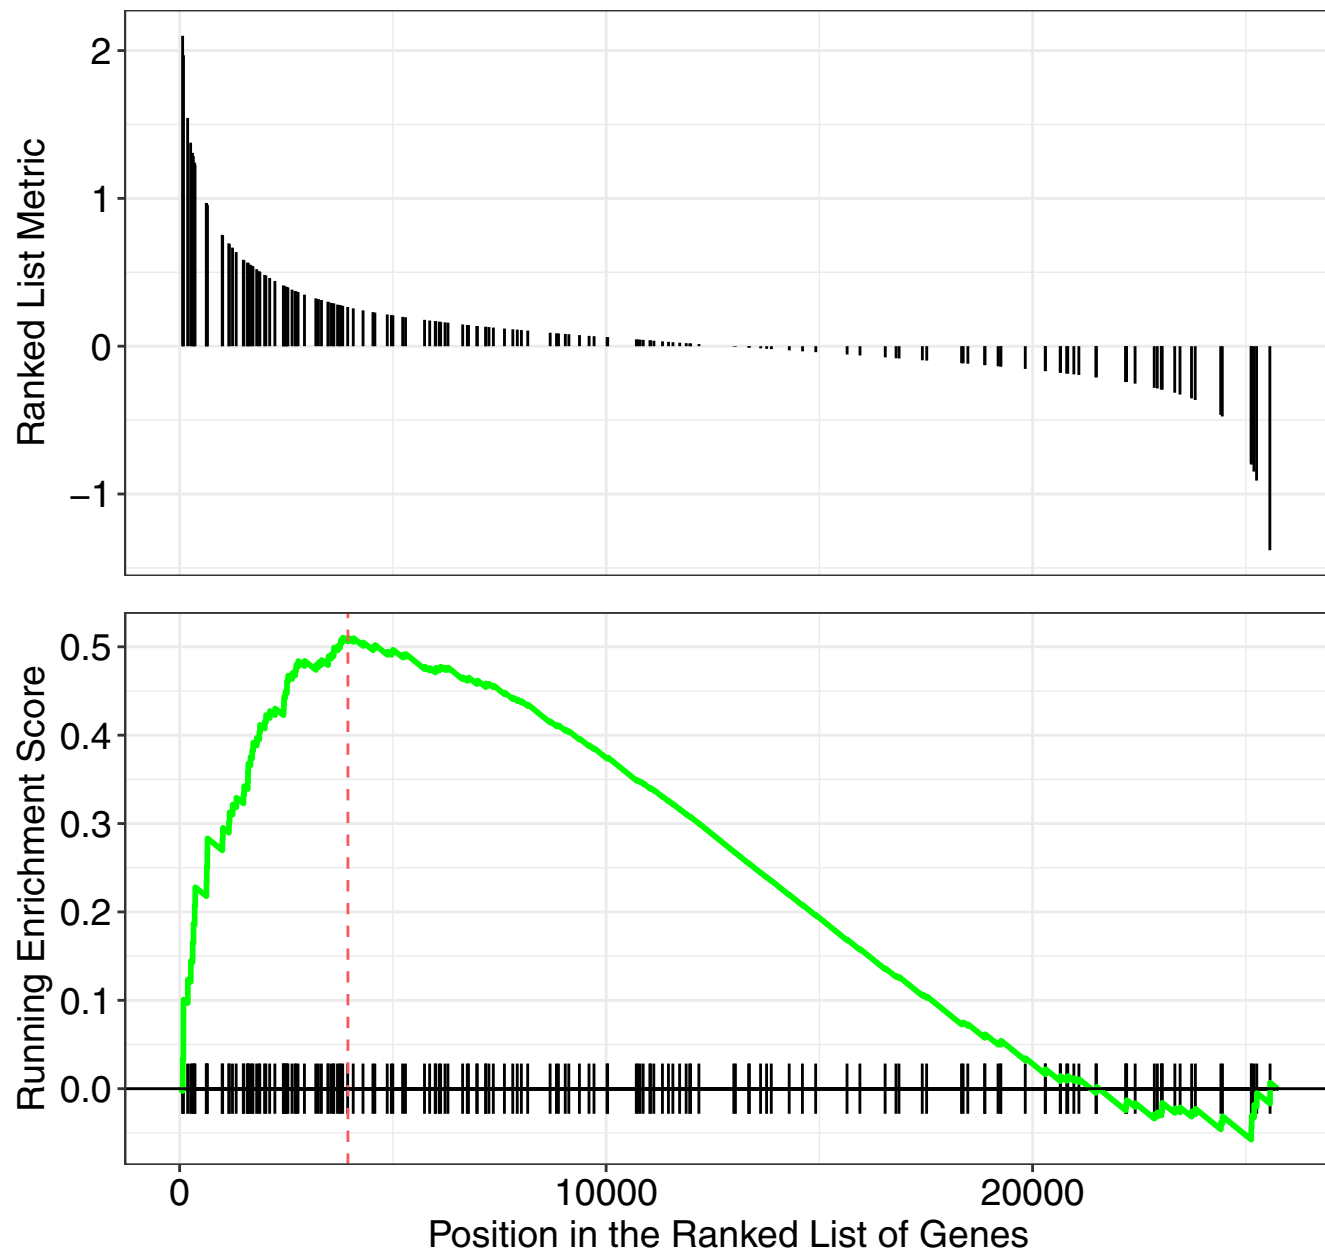

### cellular response to xenobiotic stimulus

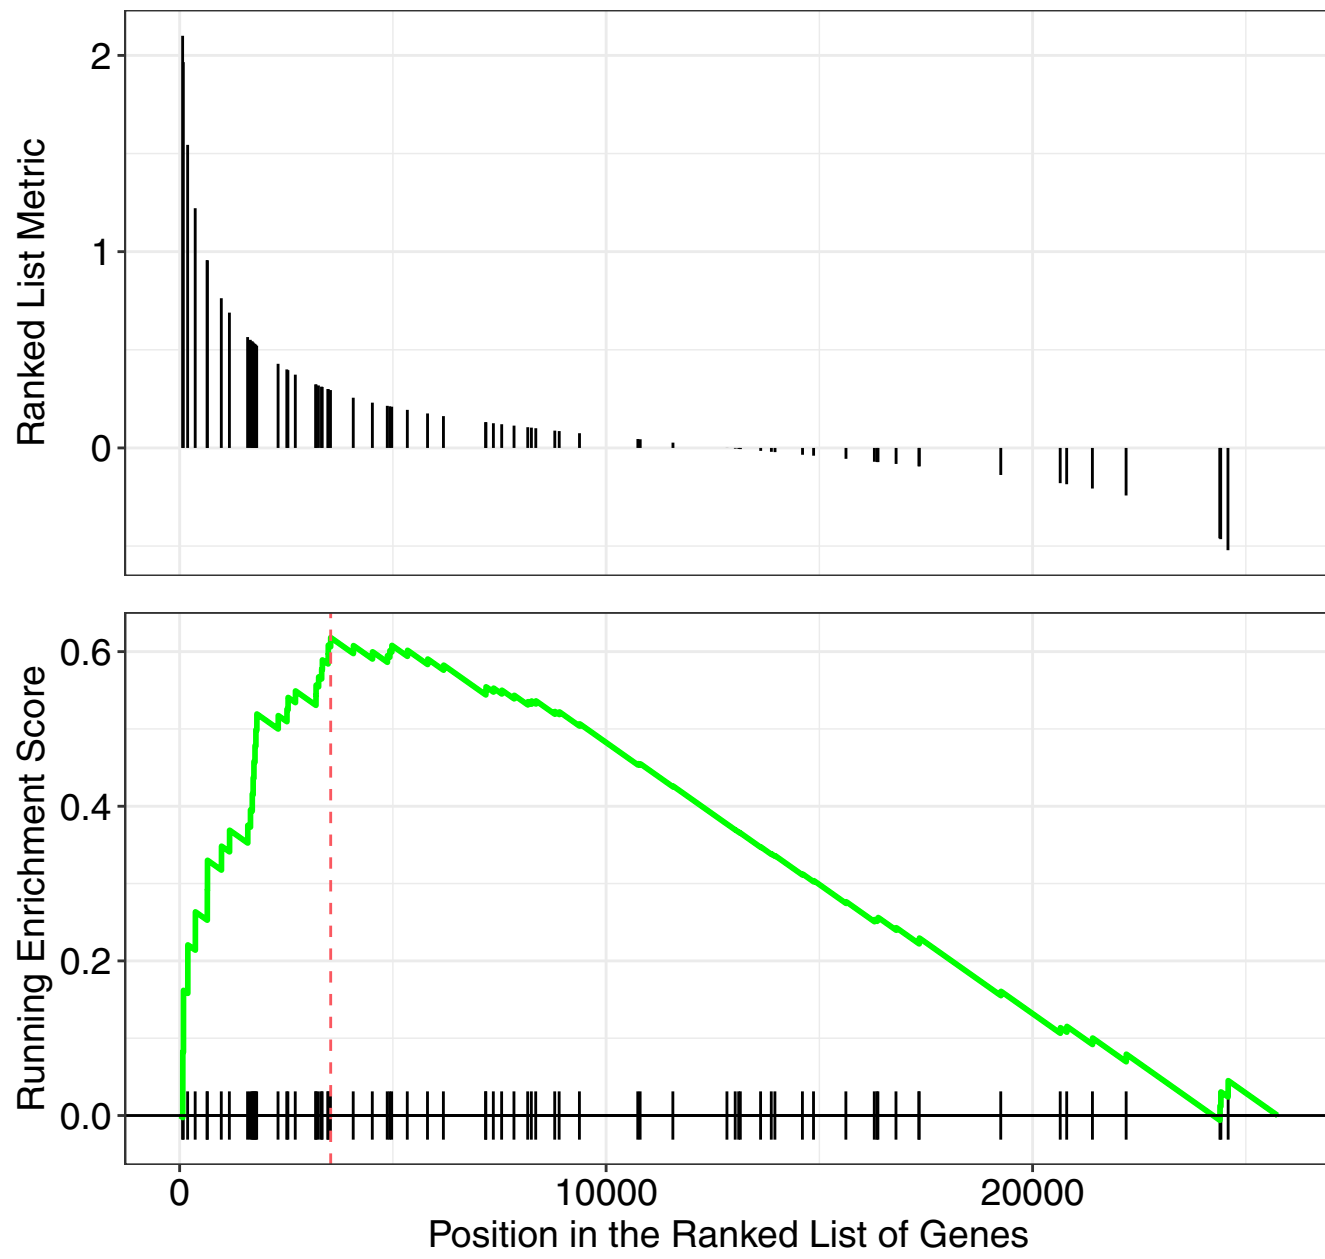

### endopeptidase activity

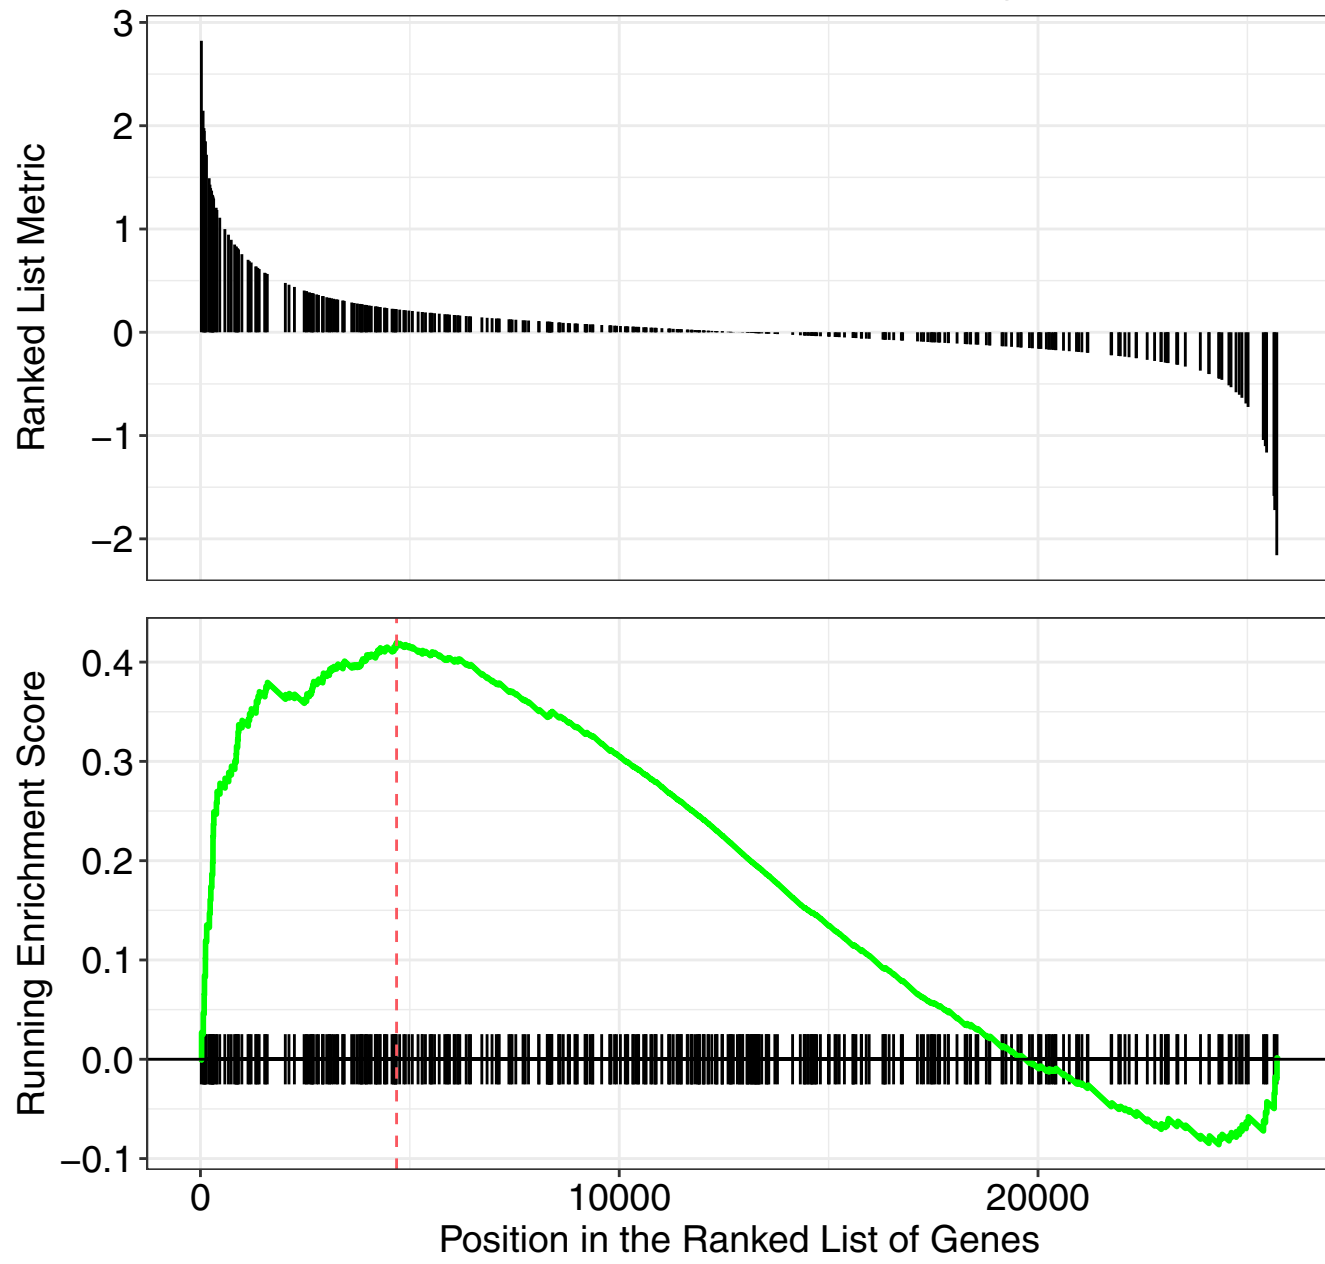

### signaling receptor activator activity

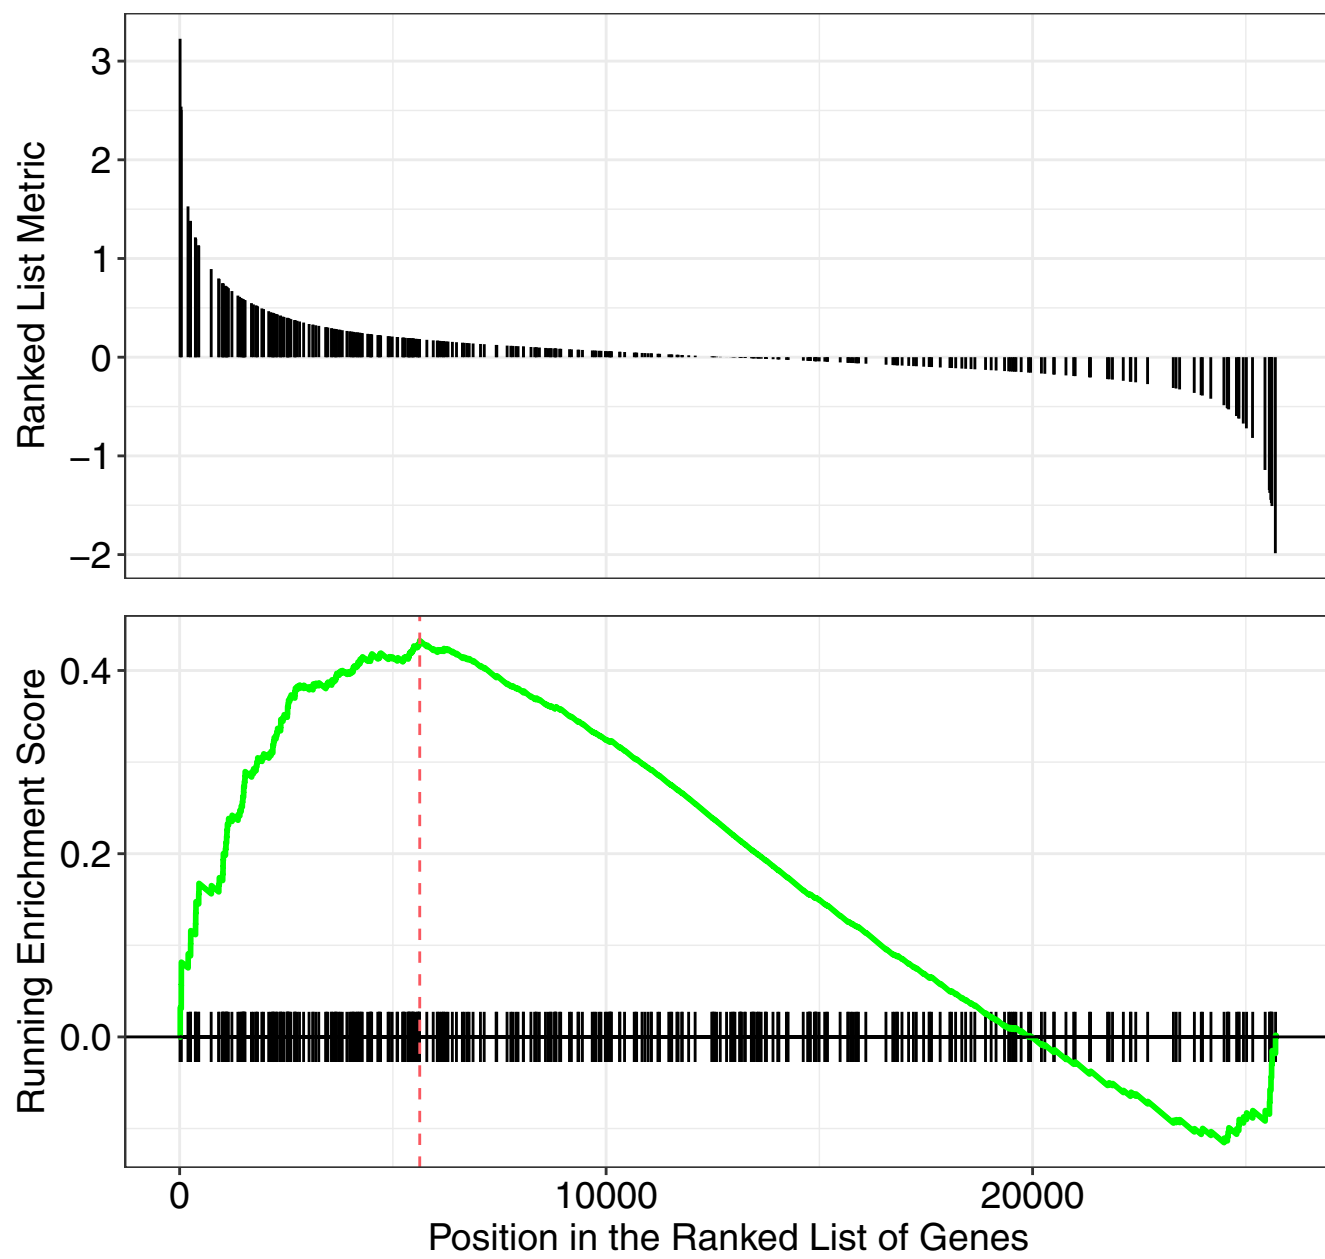



### receptor ligand activity

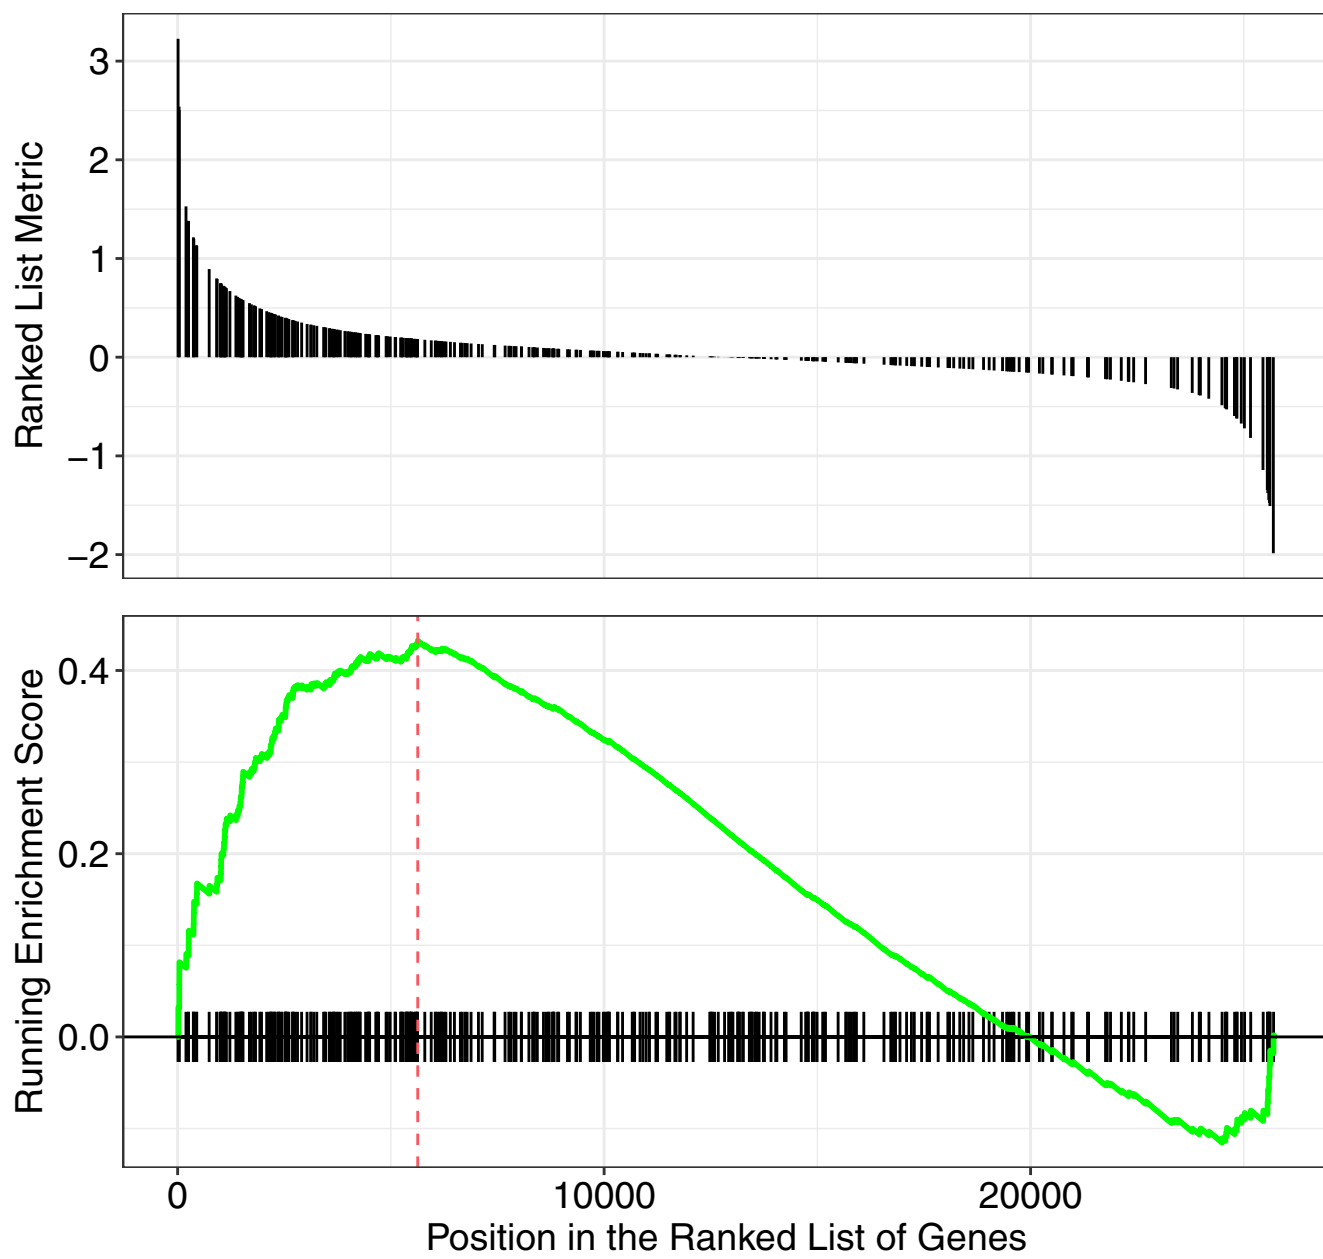

### heme binding

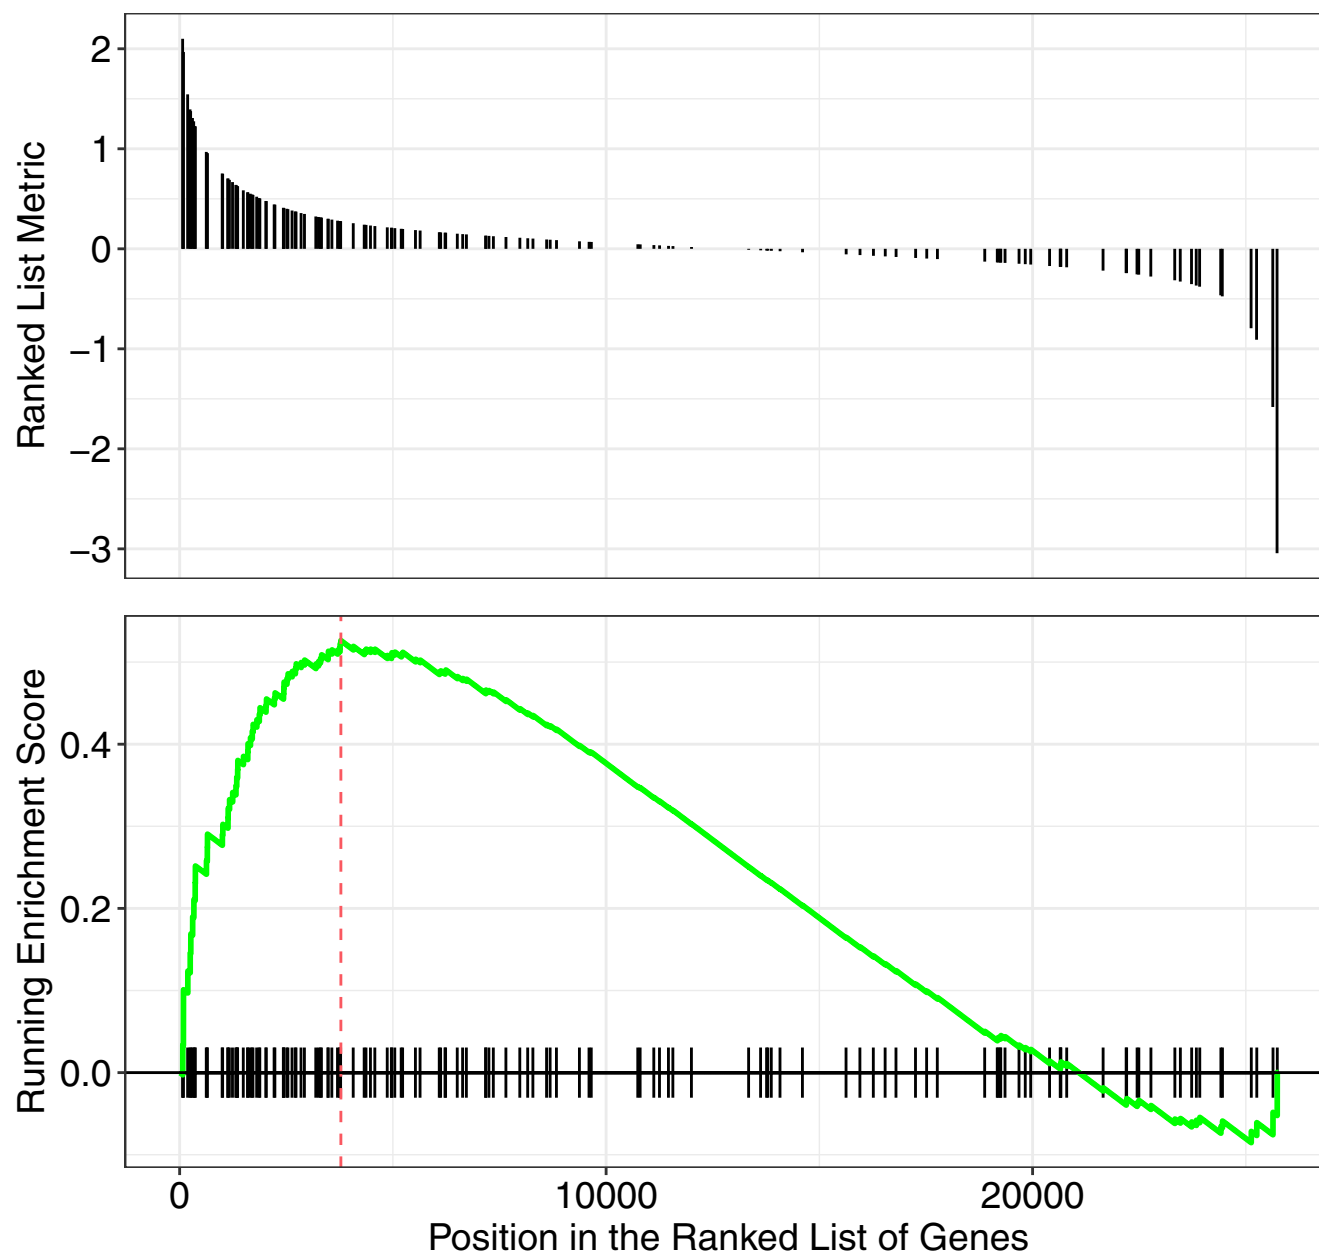

### regulation of circadian rhythm

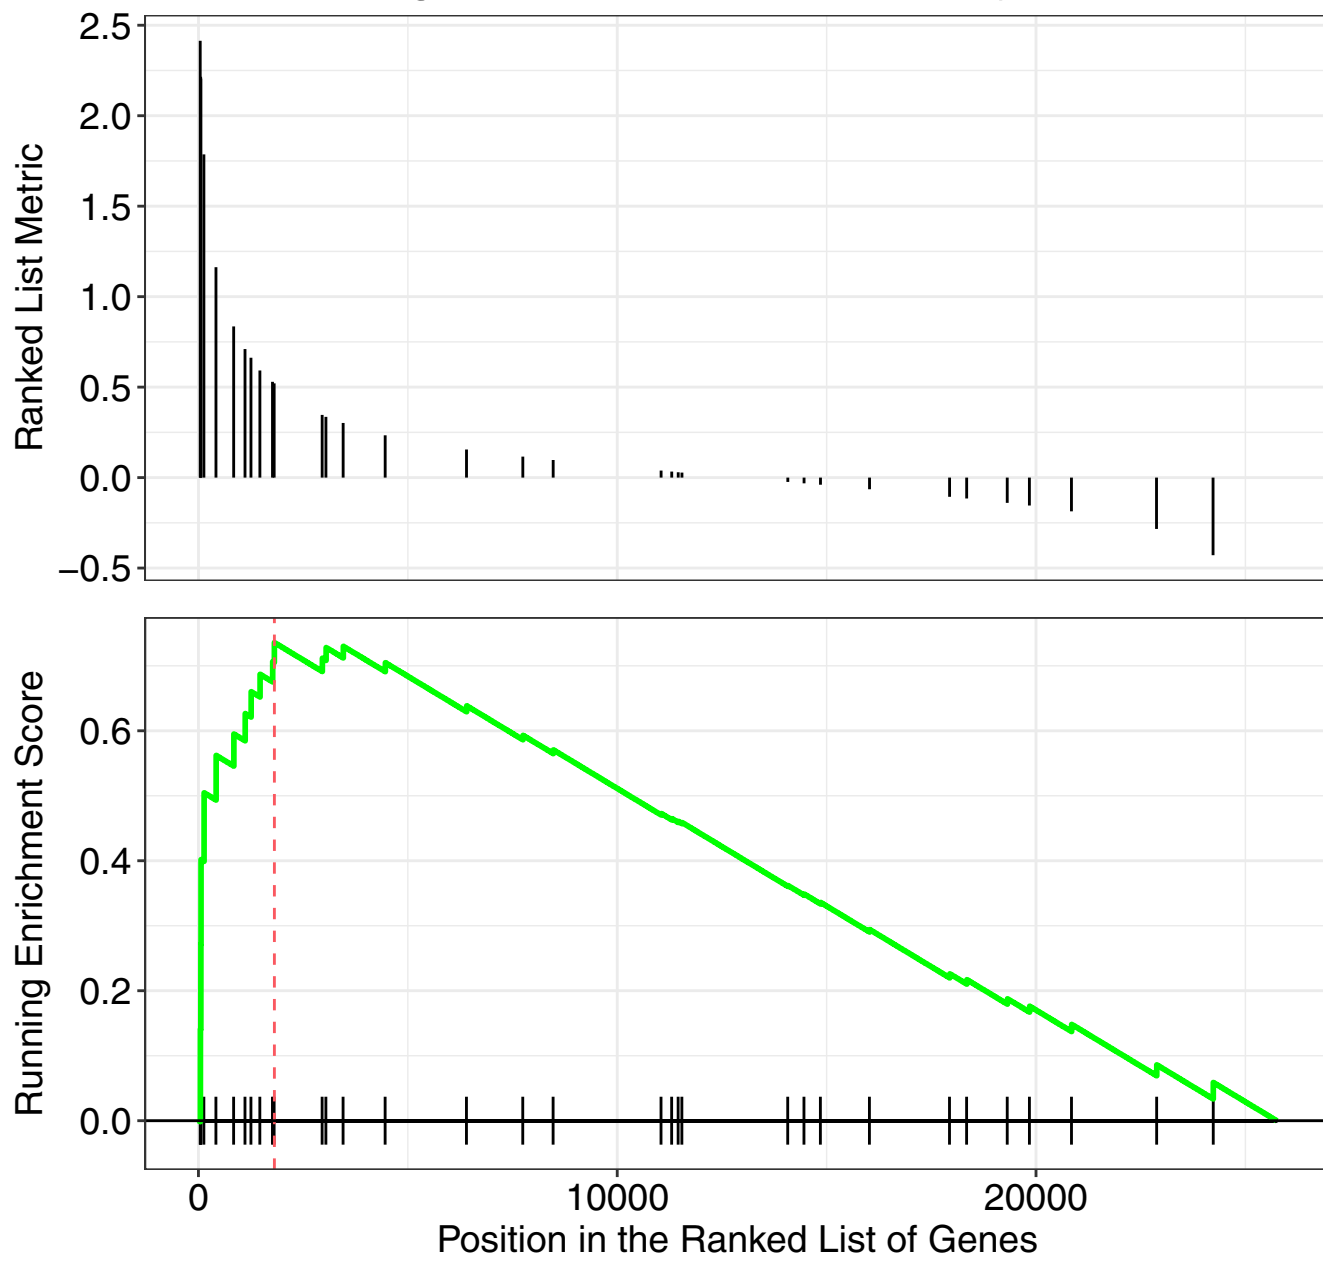

### receptor regulator activity

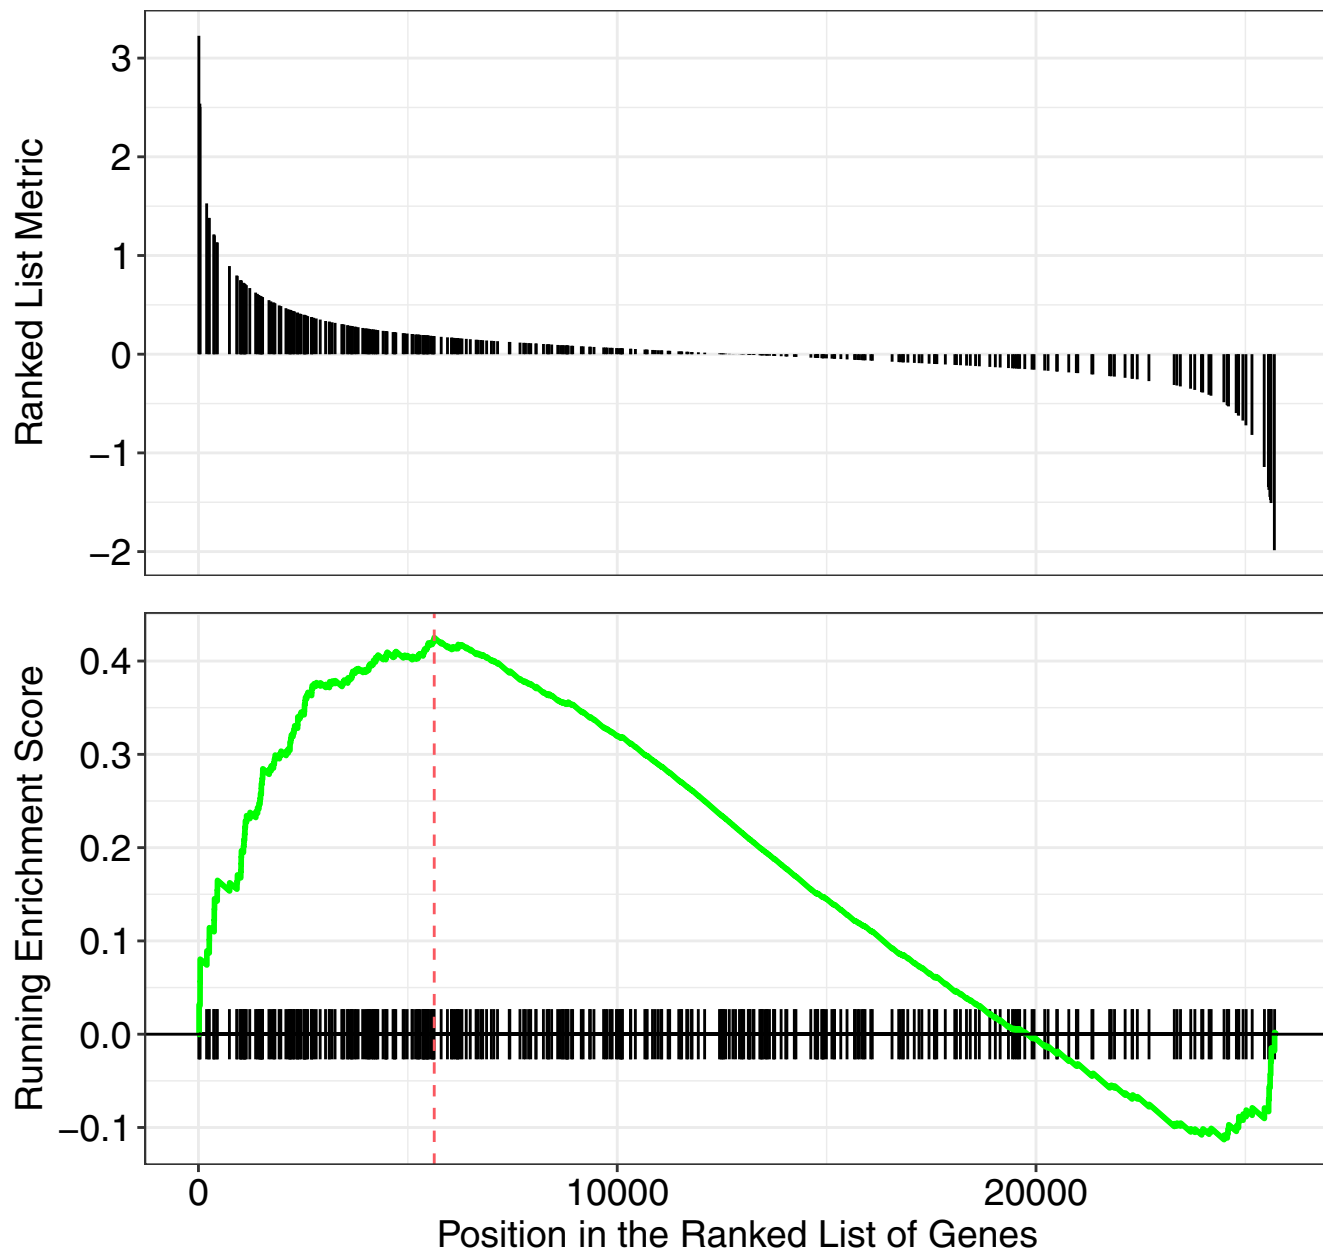

### circadian rhythm

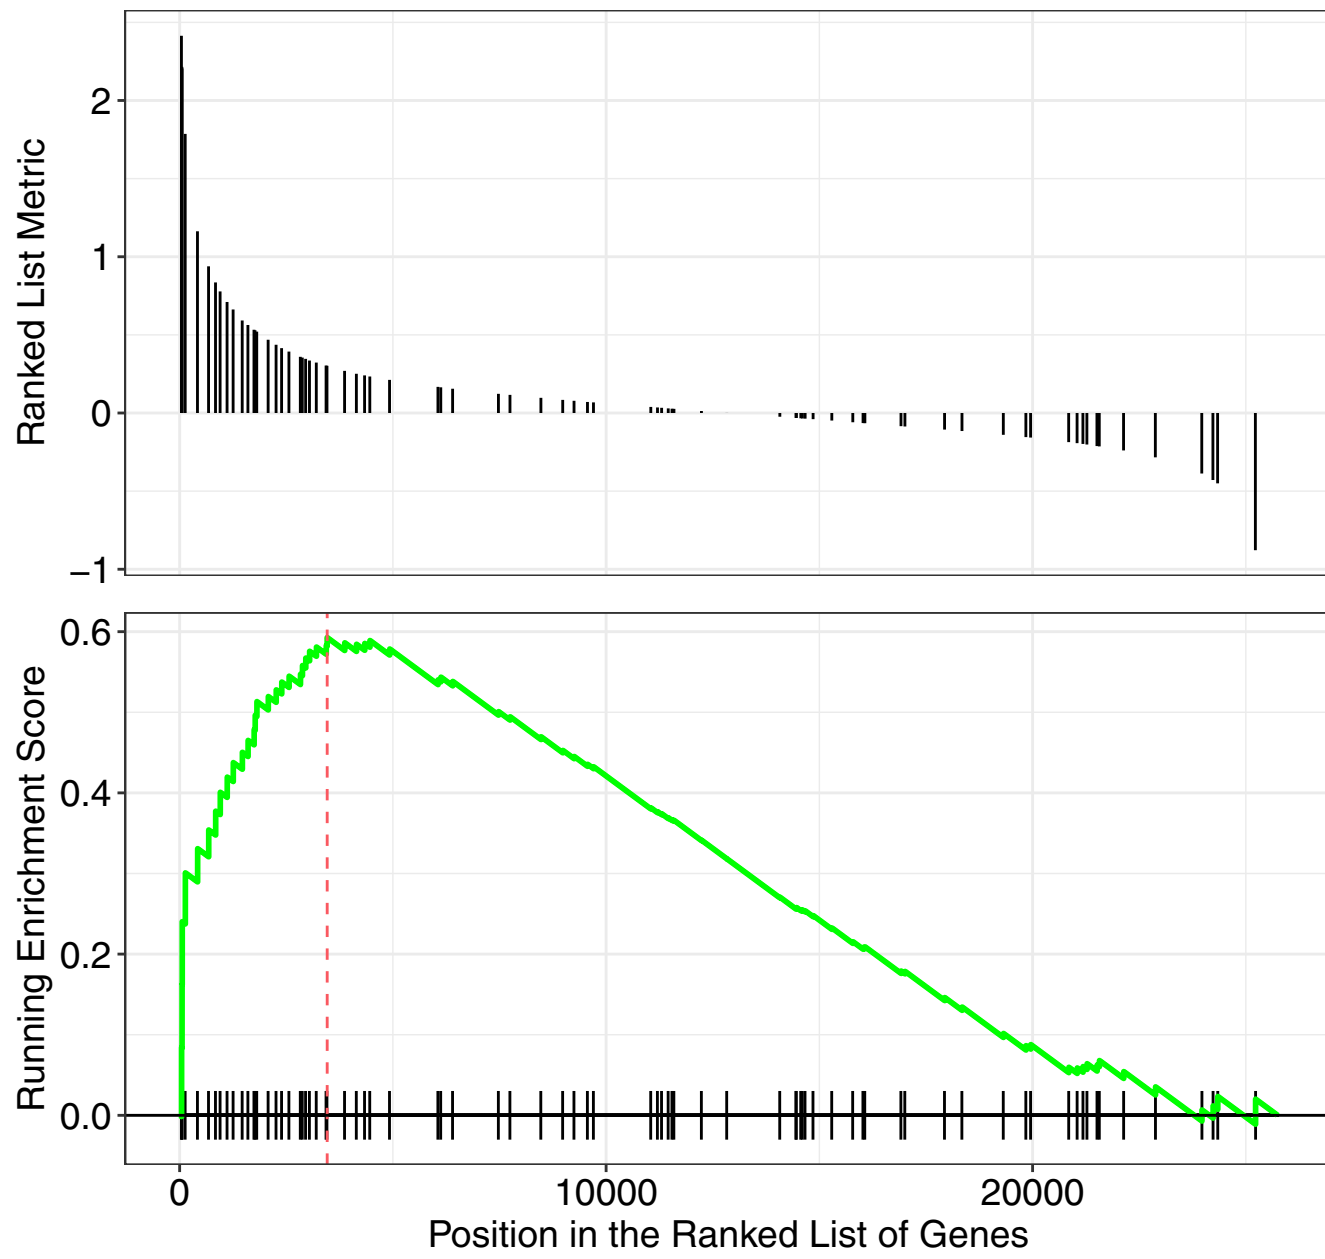

incorporation or reduction of molecular oxygen, reduced flavin or flavoprotein

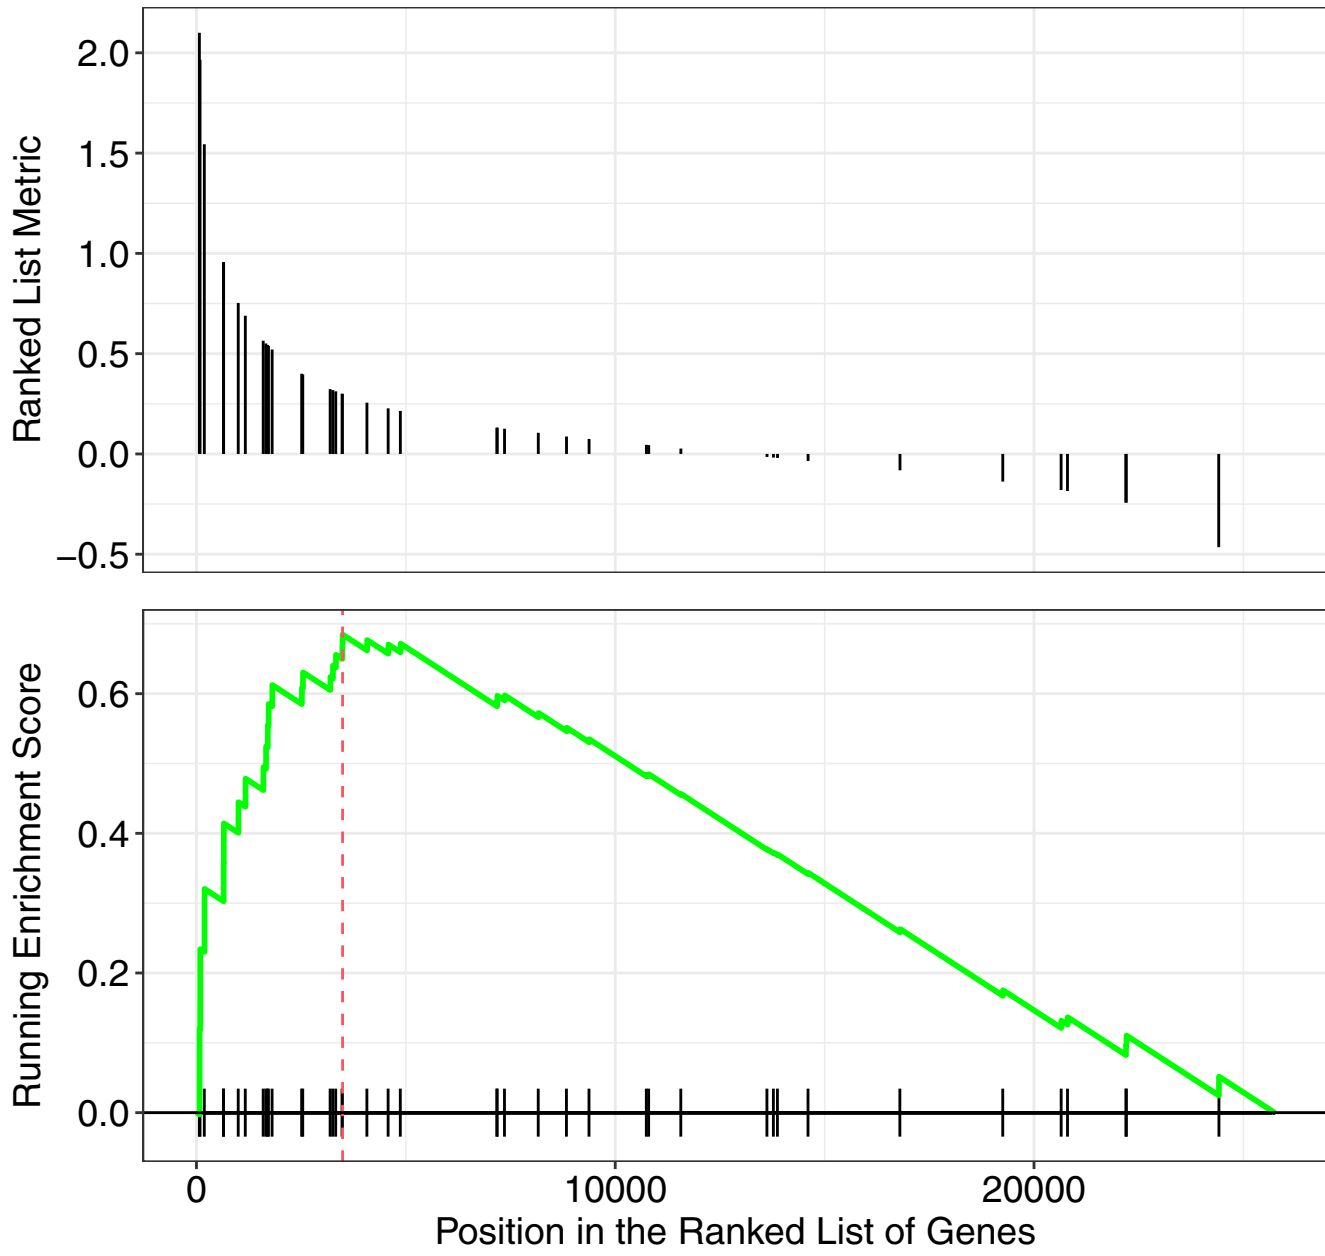

### xenobiotic metabolic process

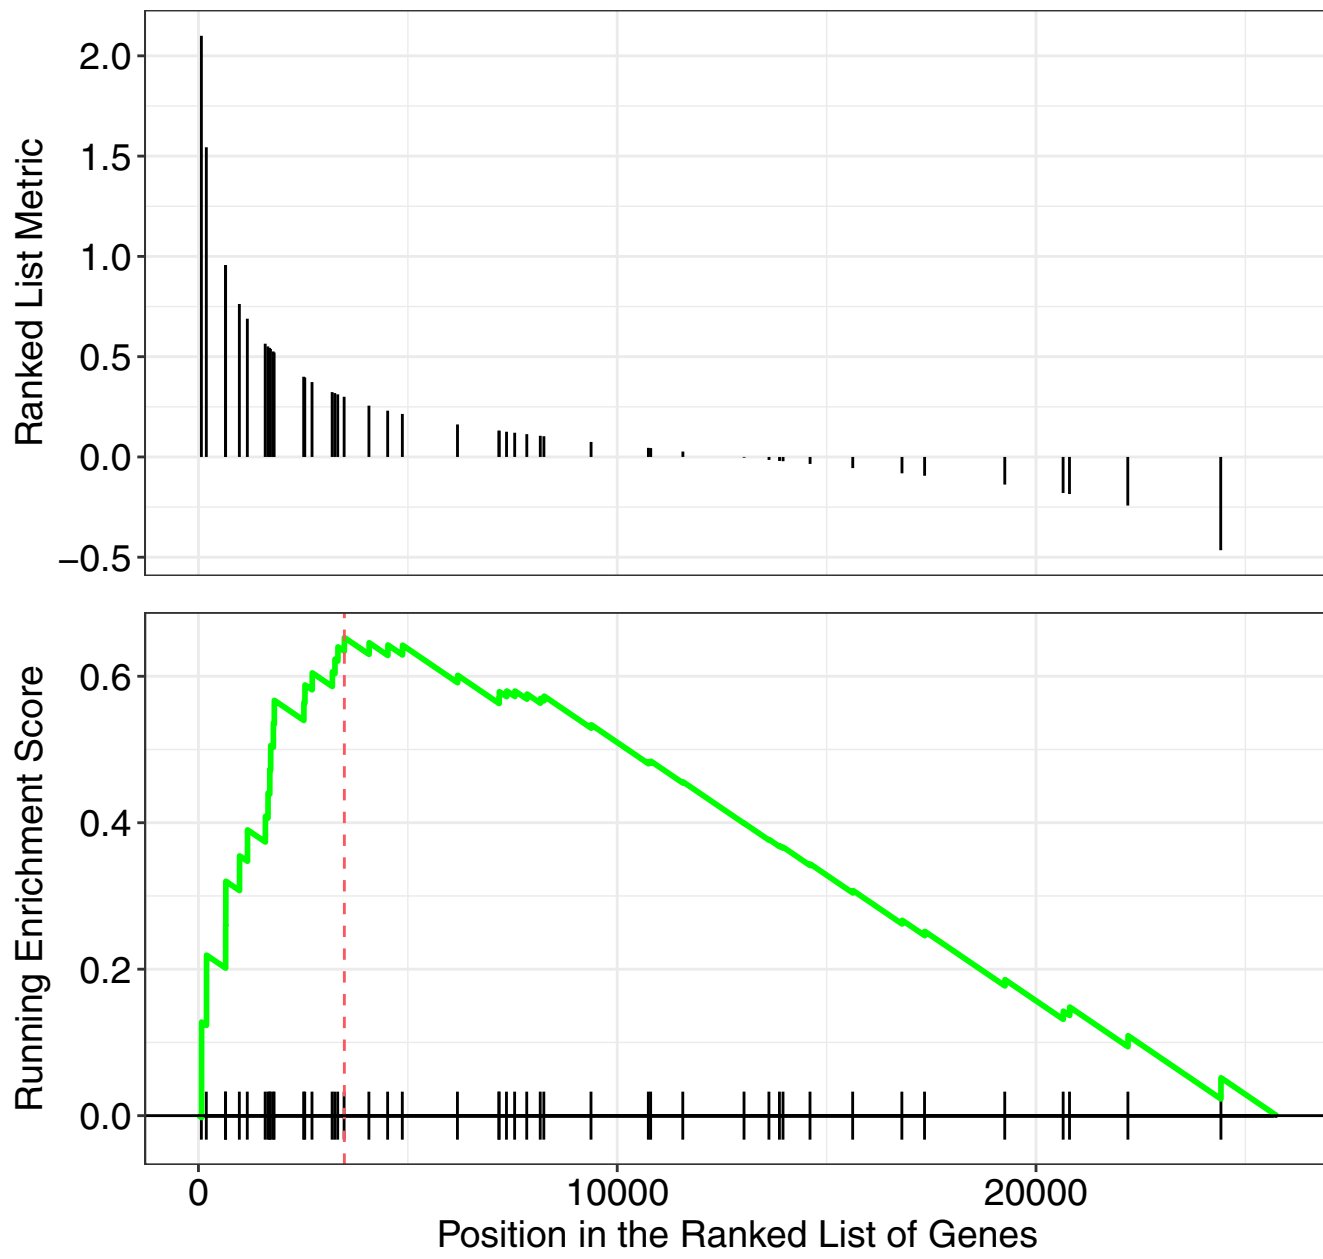

## chemical homeostasis

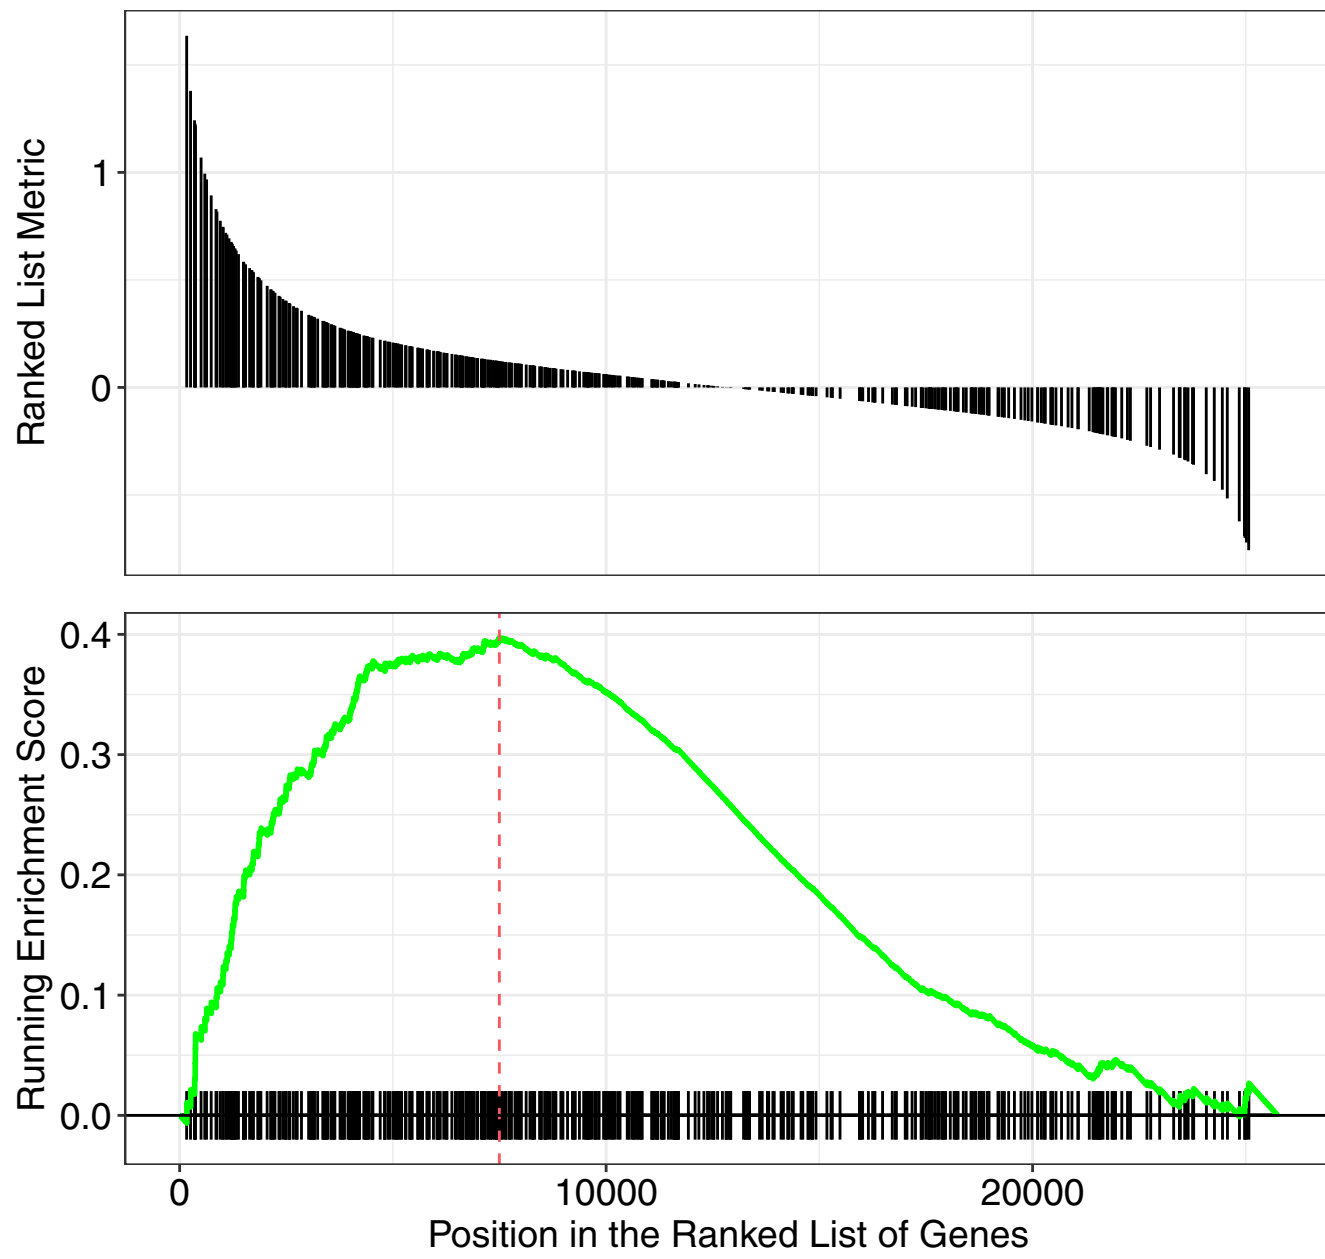



### photoperiodism

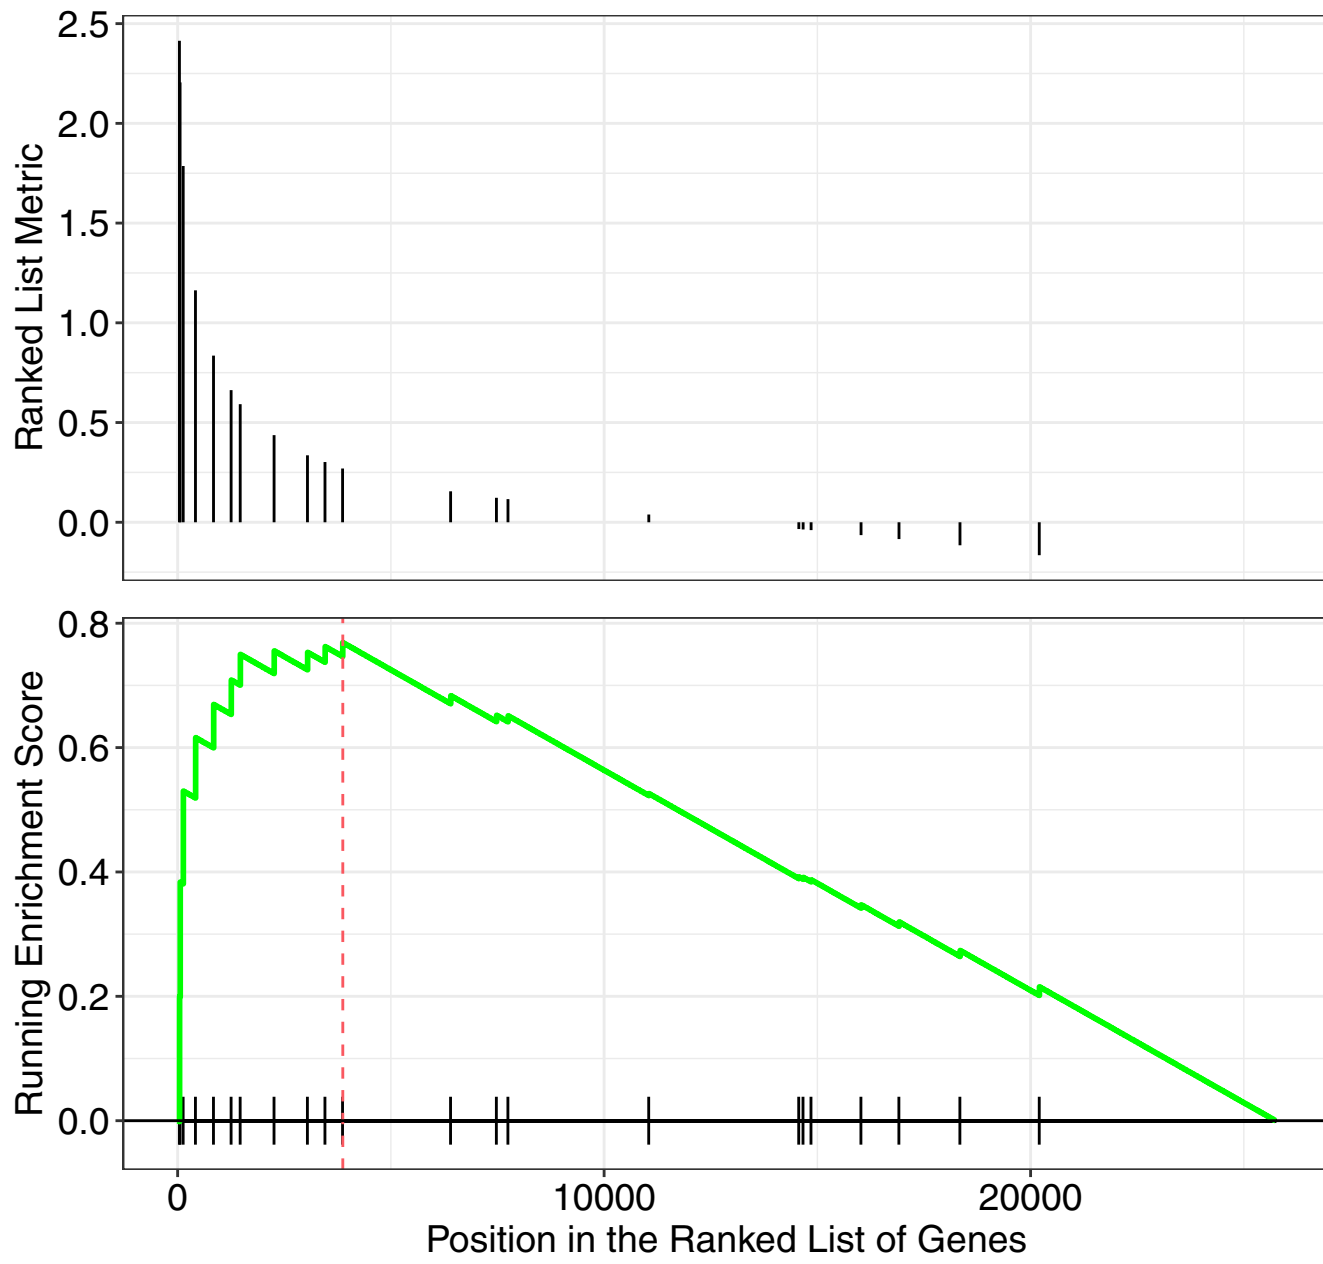

### entrainment of circadian clock

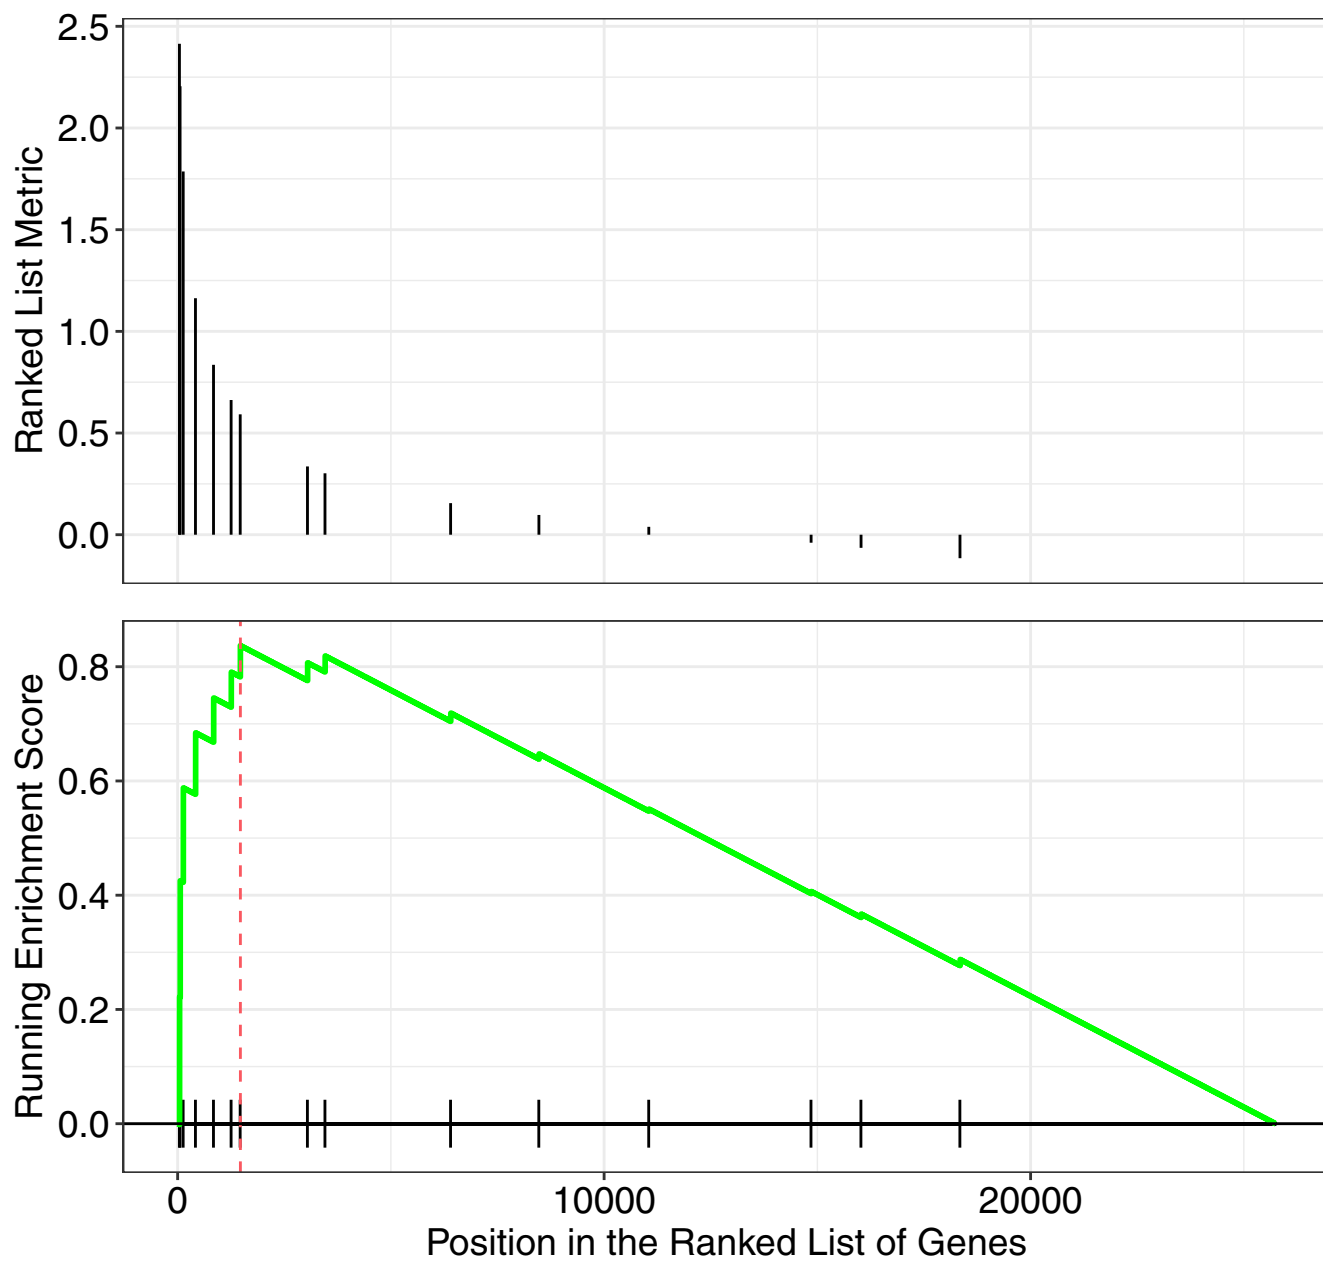

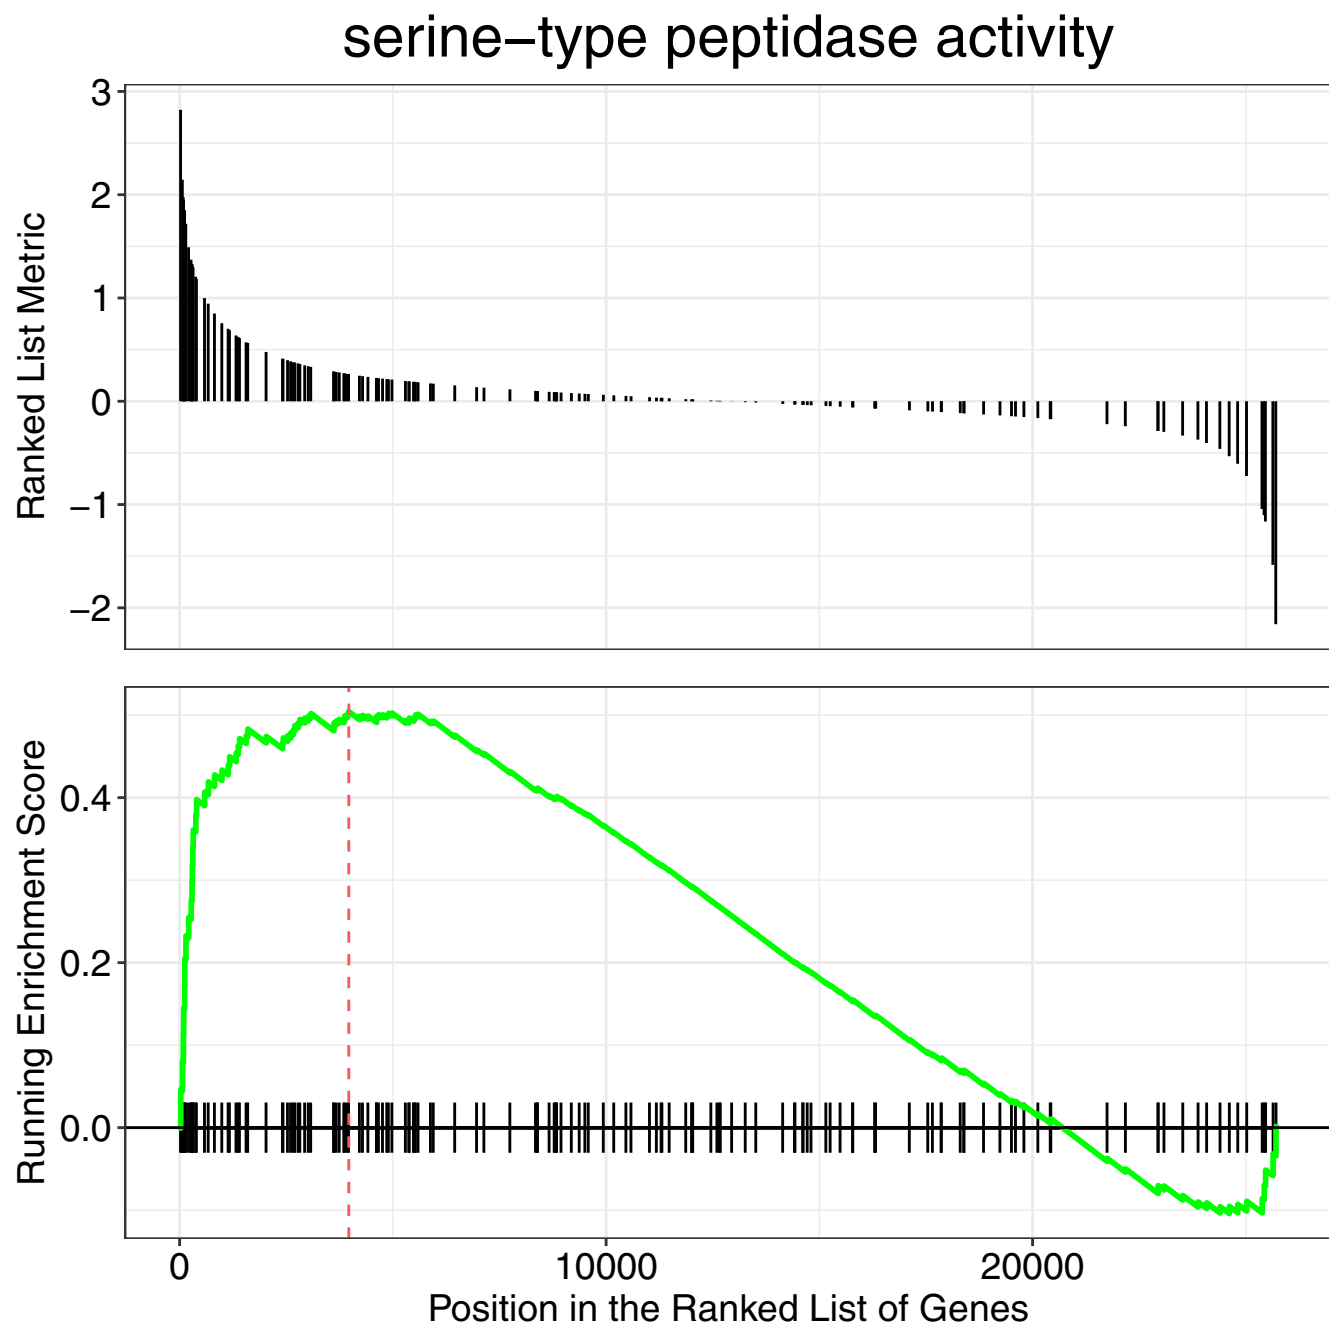

### serine hydrolase activity

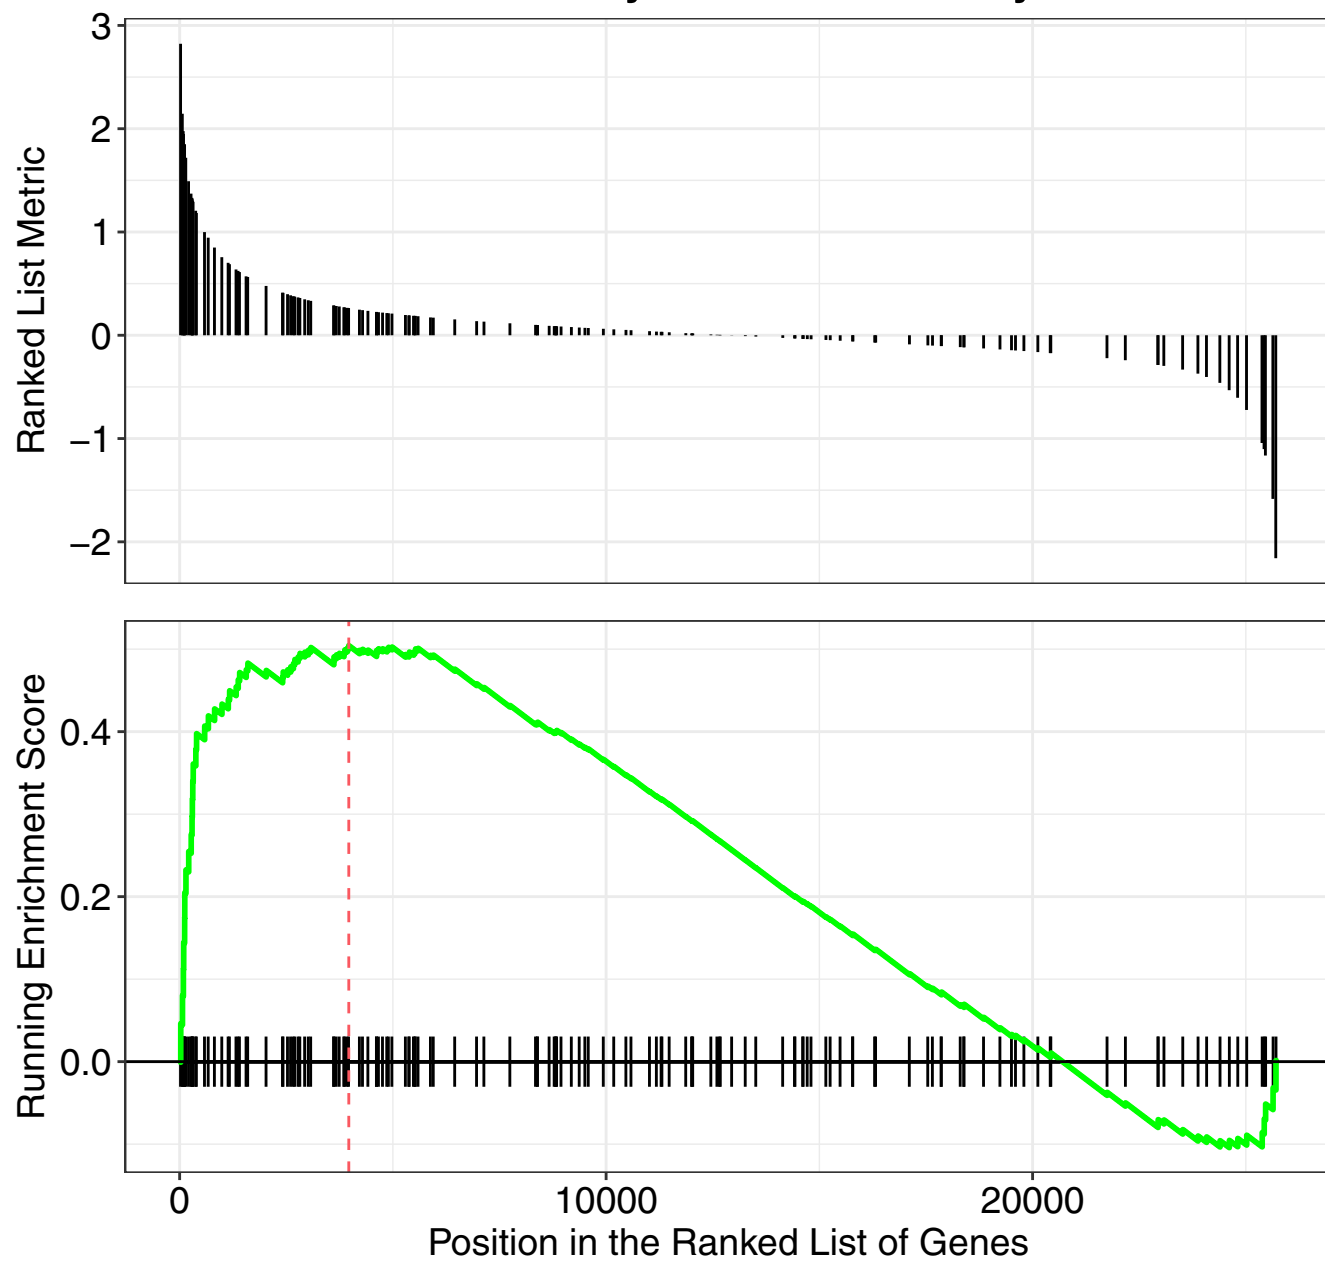

### entrainment of circadian clock by photoperiod

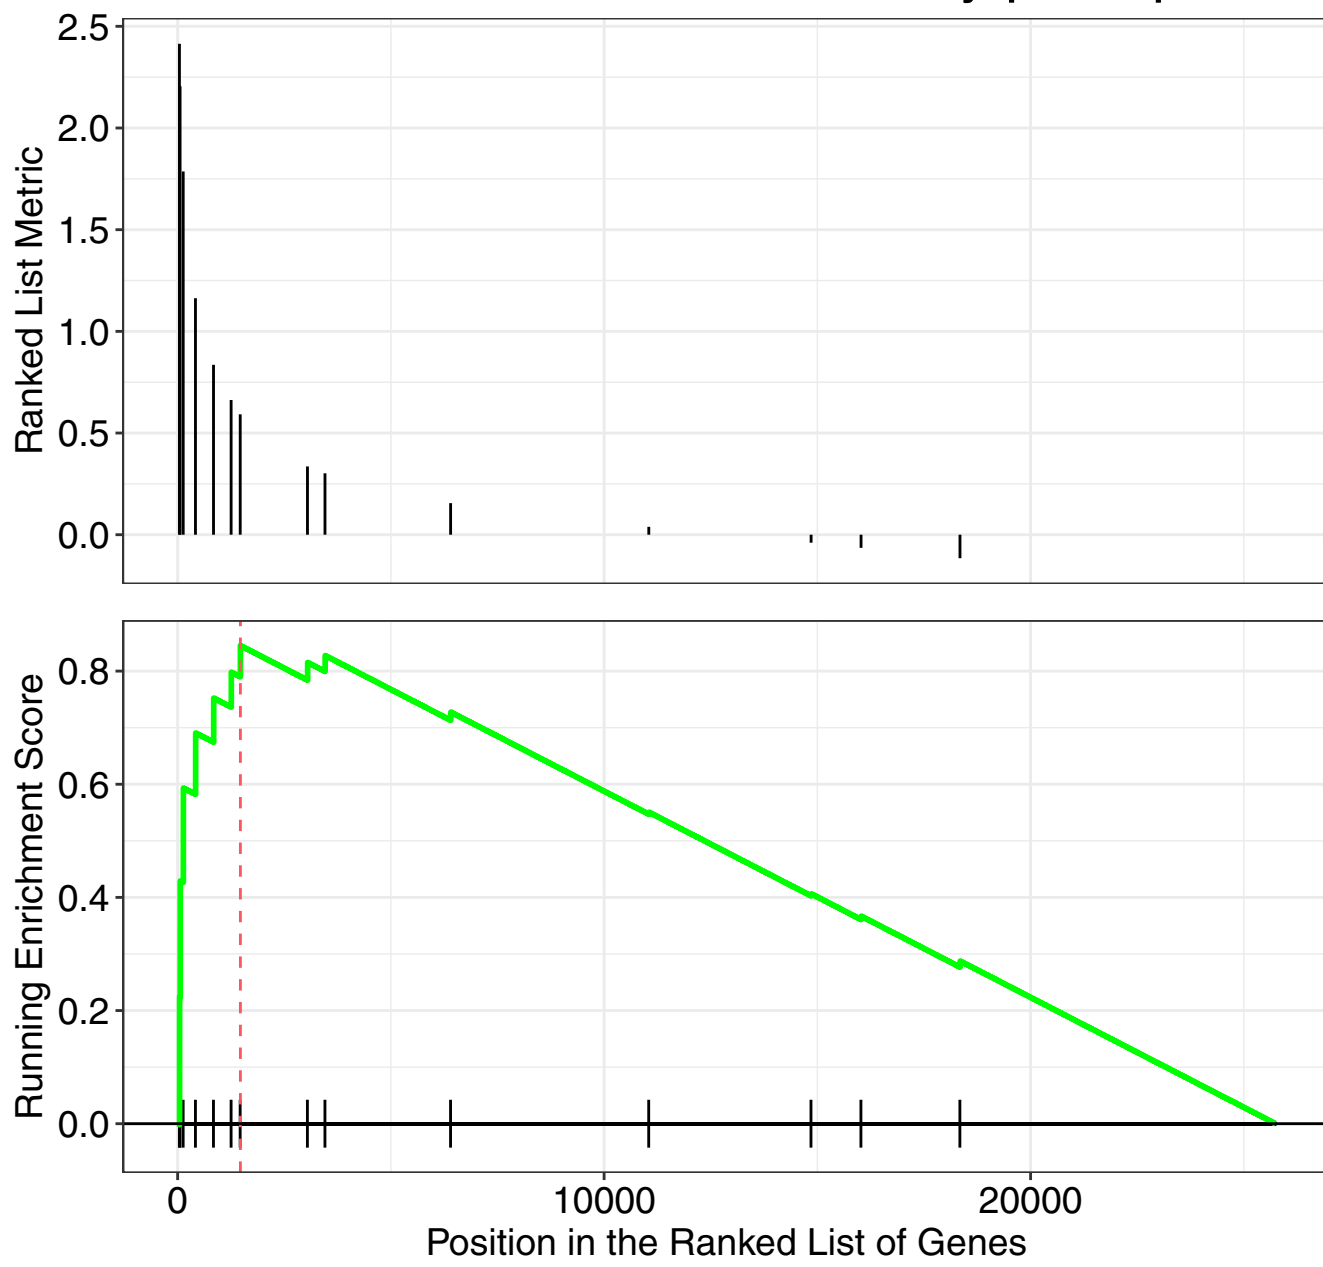

### serine-type endopeptidase activity

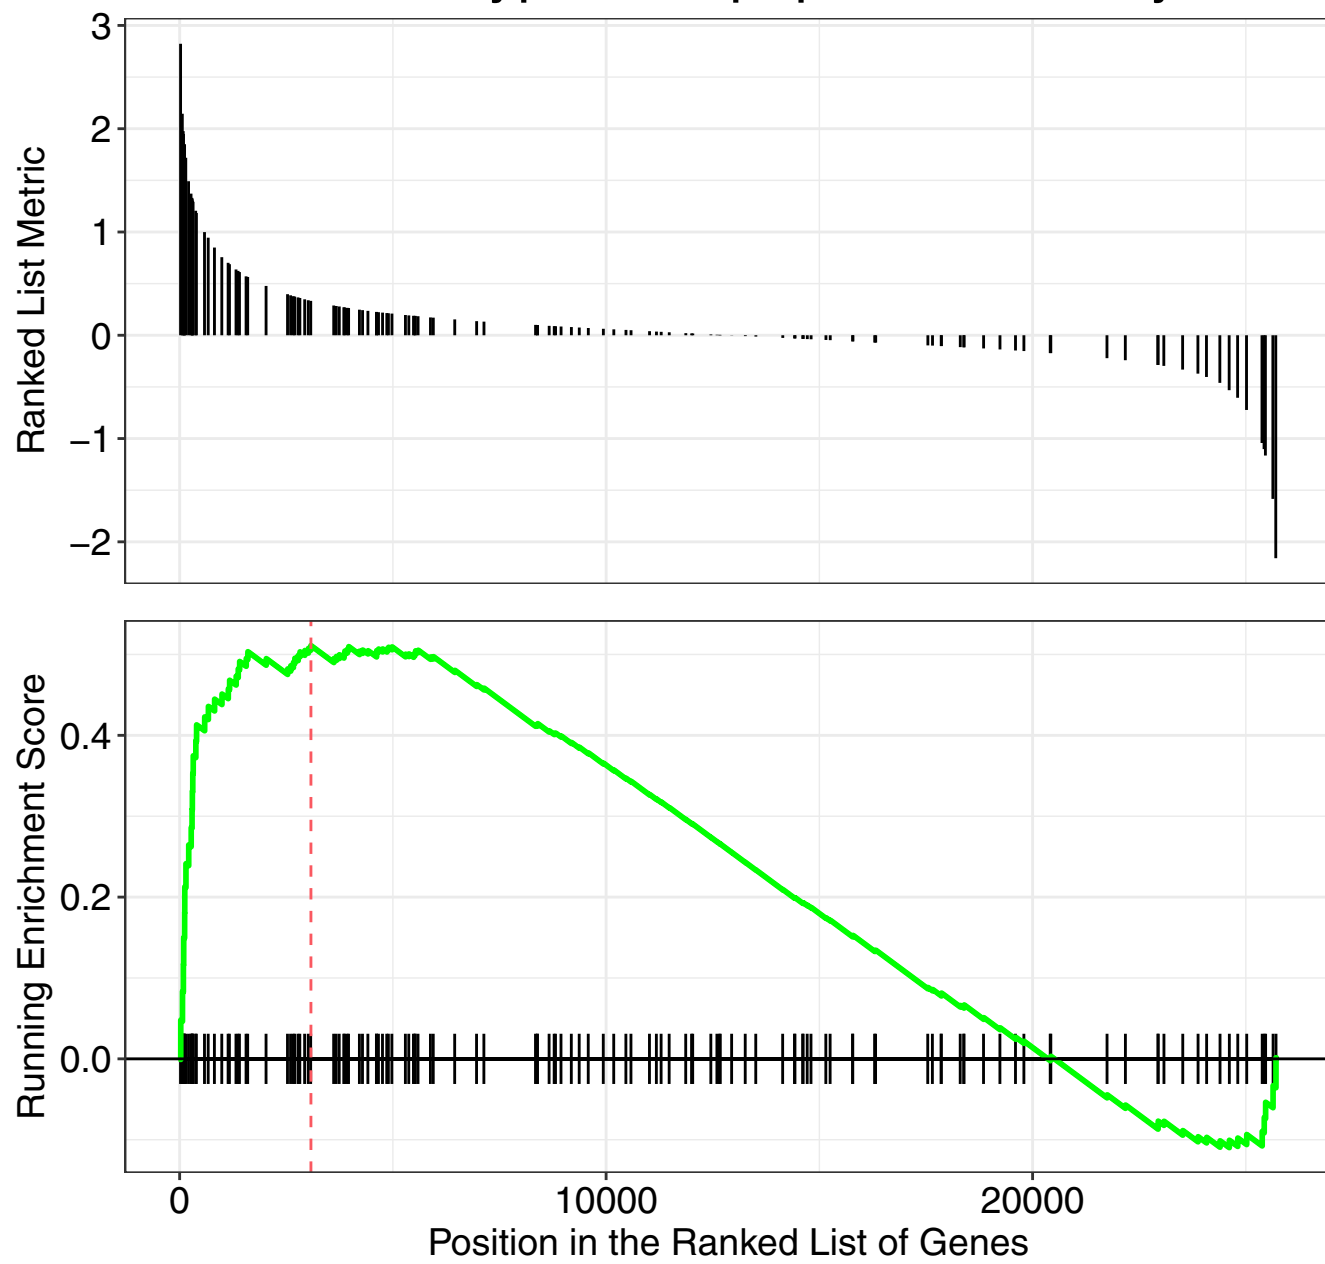

### steroid hydroxylase activity

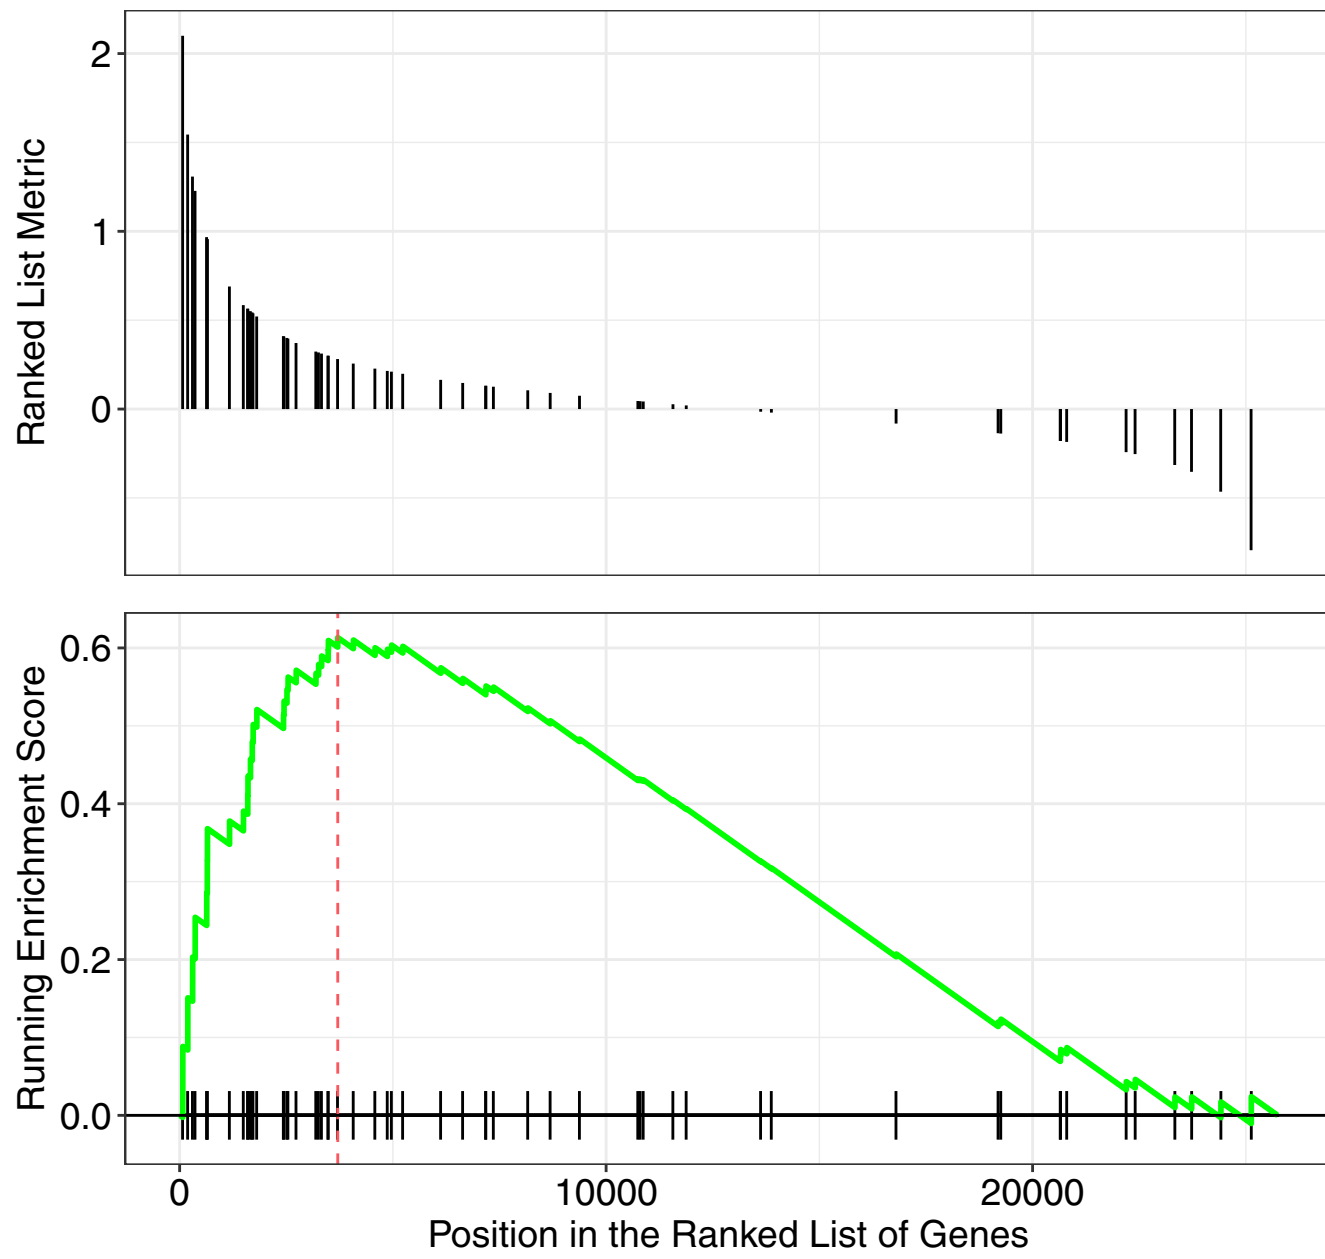

### steroid metabolic process

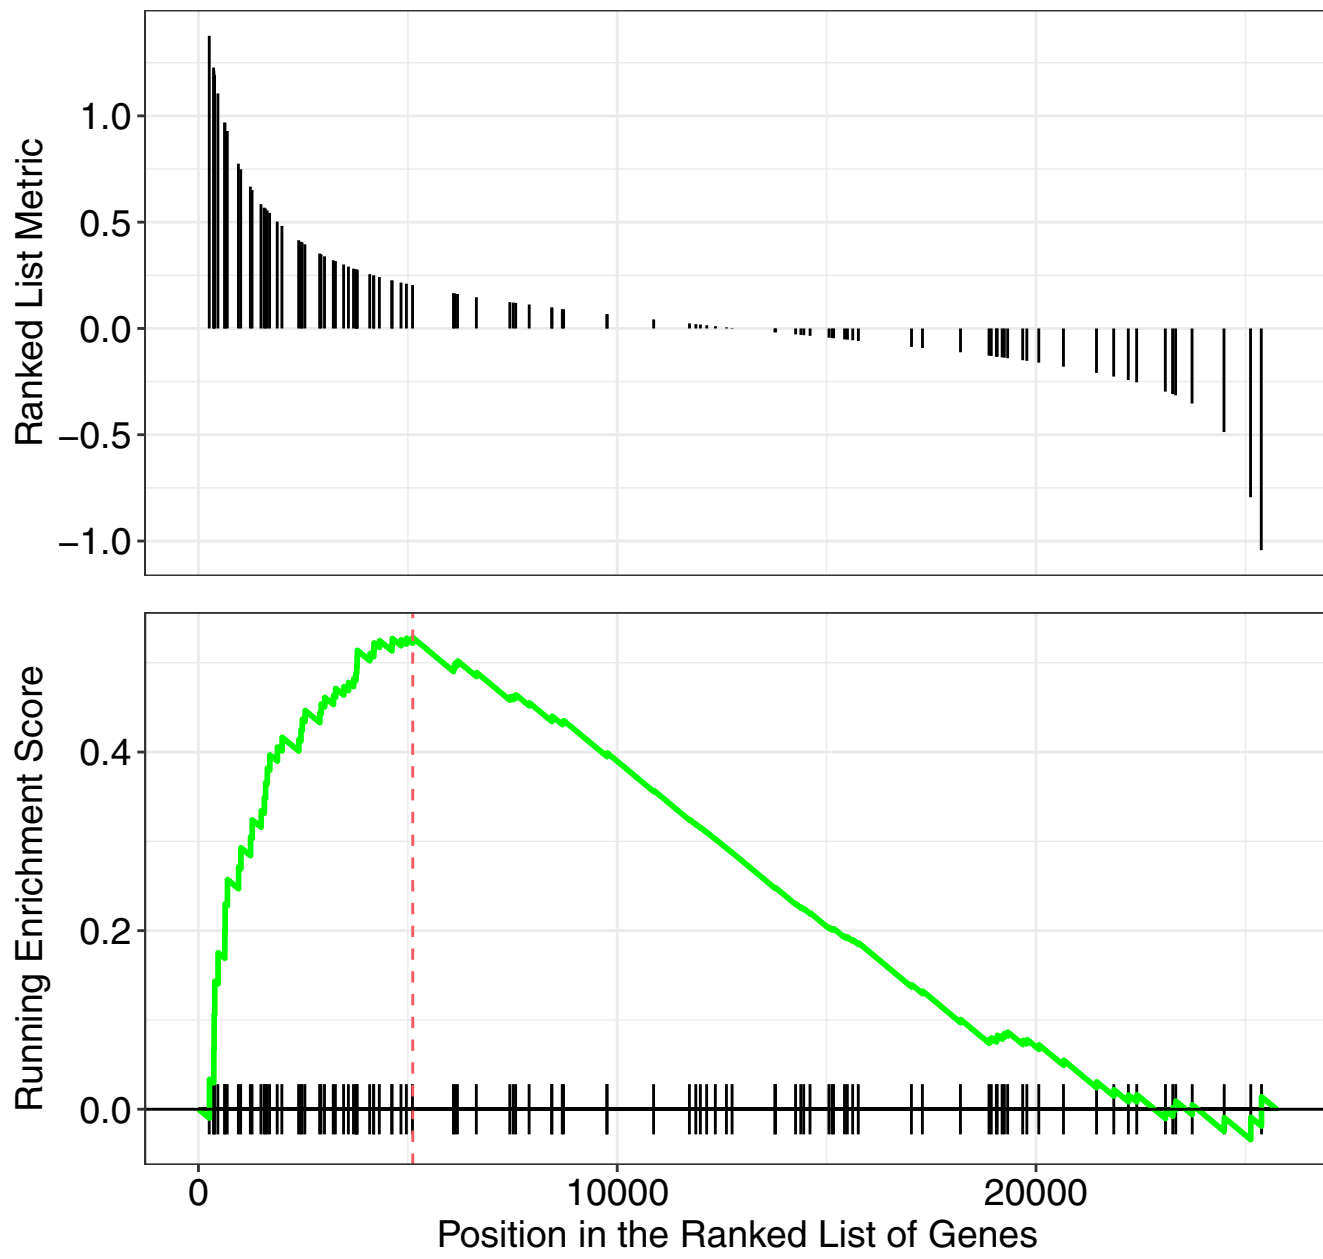



### immune response

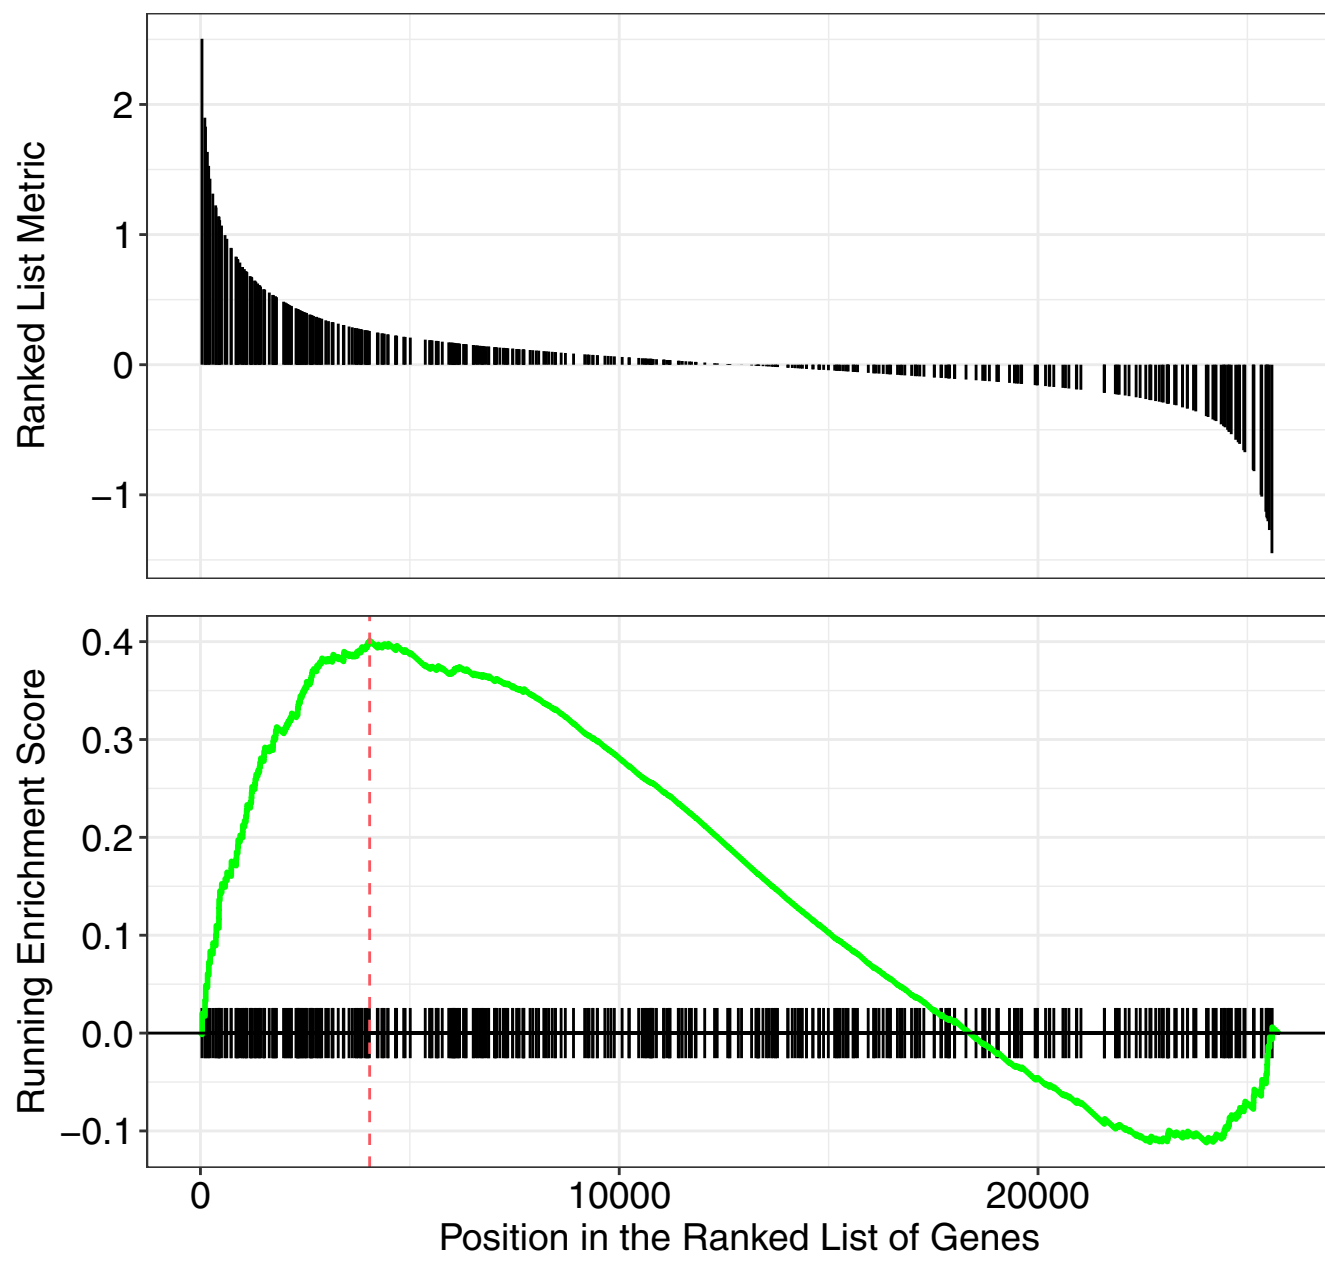

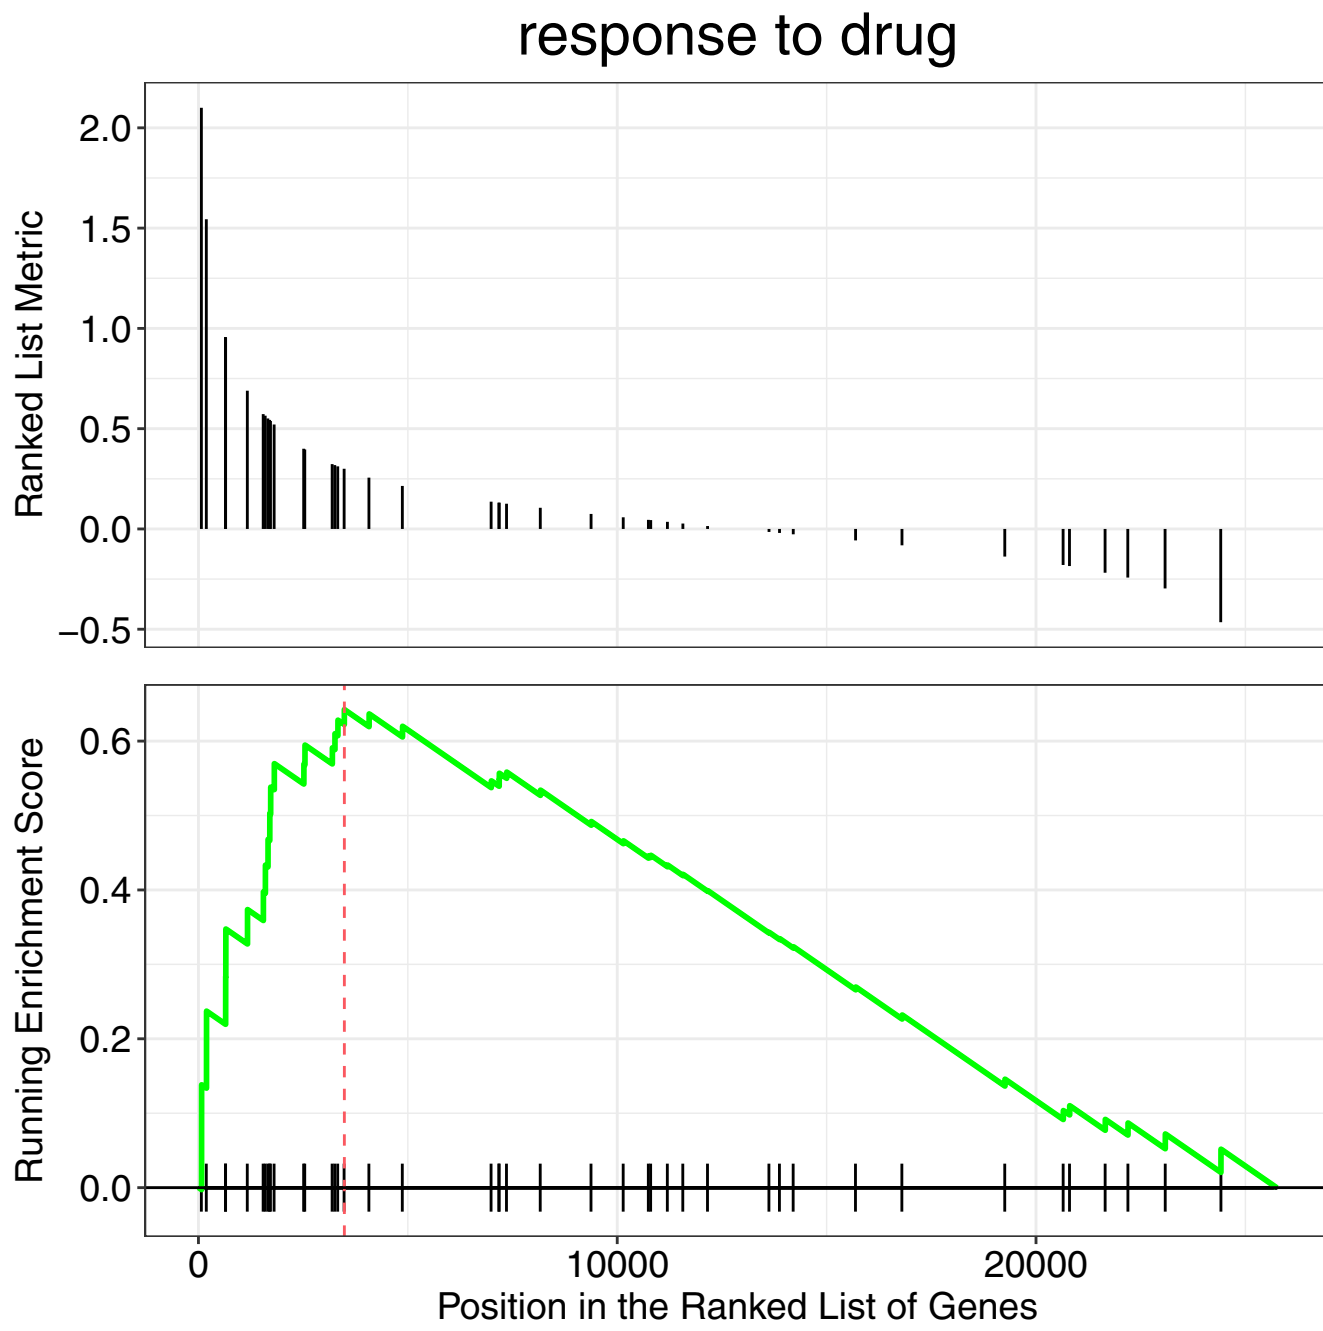

### organic hydroxy compound metabolic process

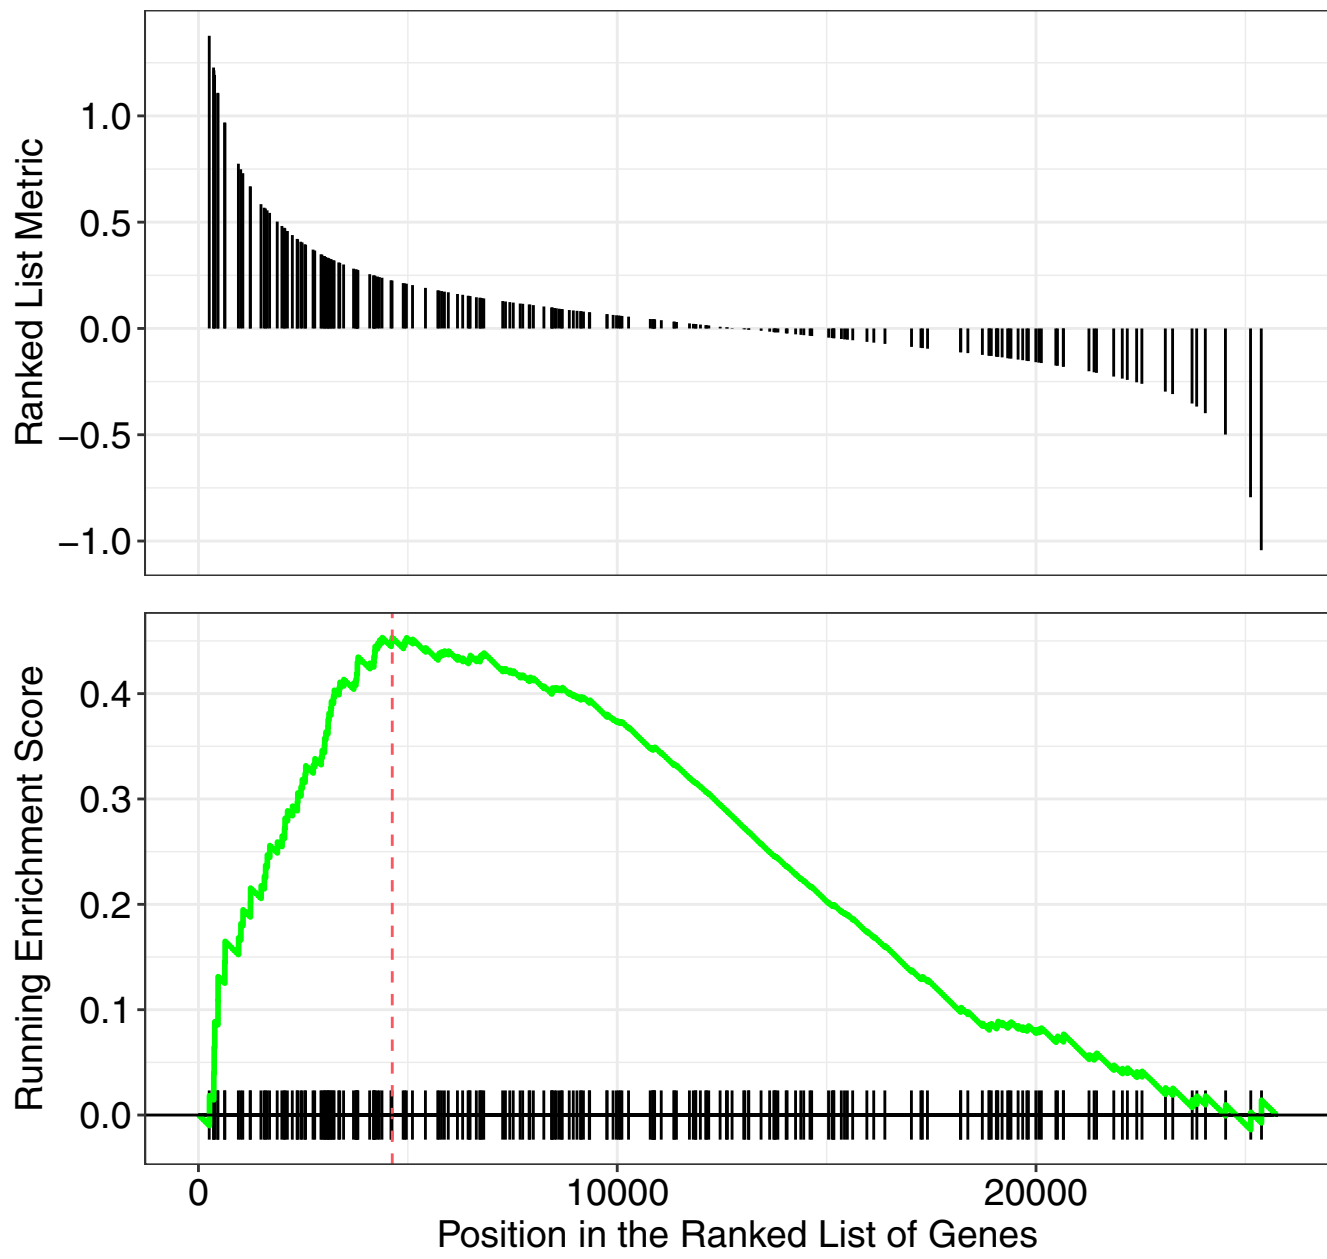

### oxidoreductase activity

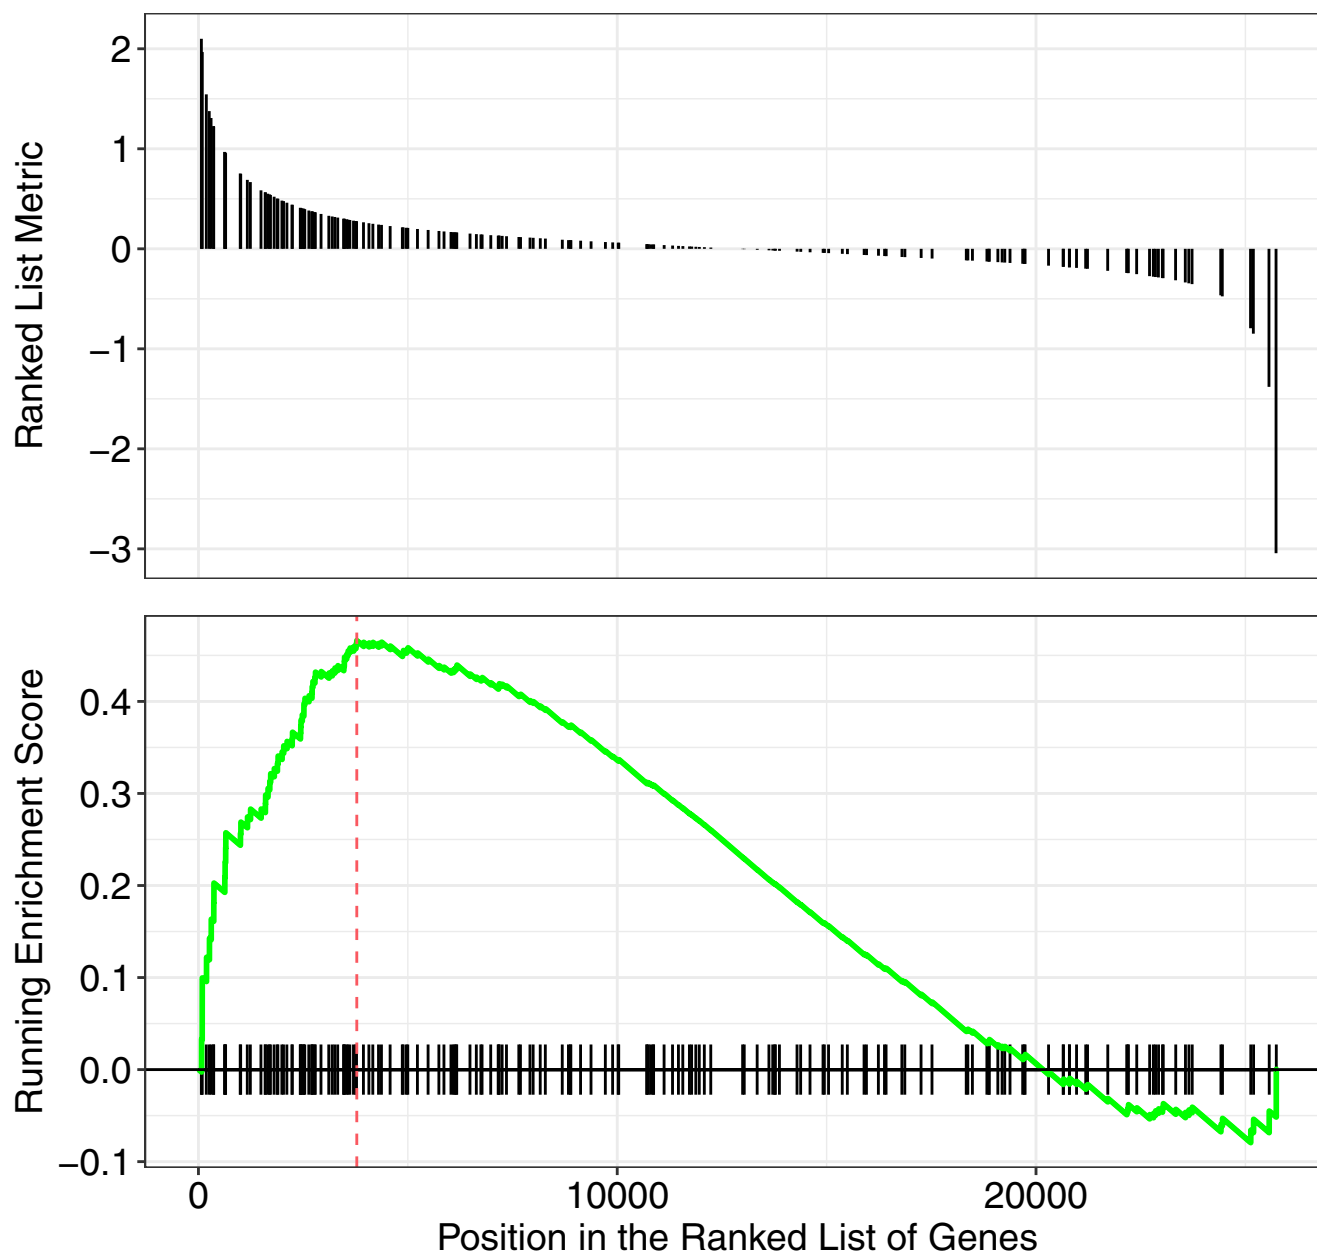

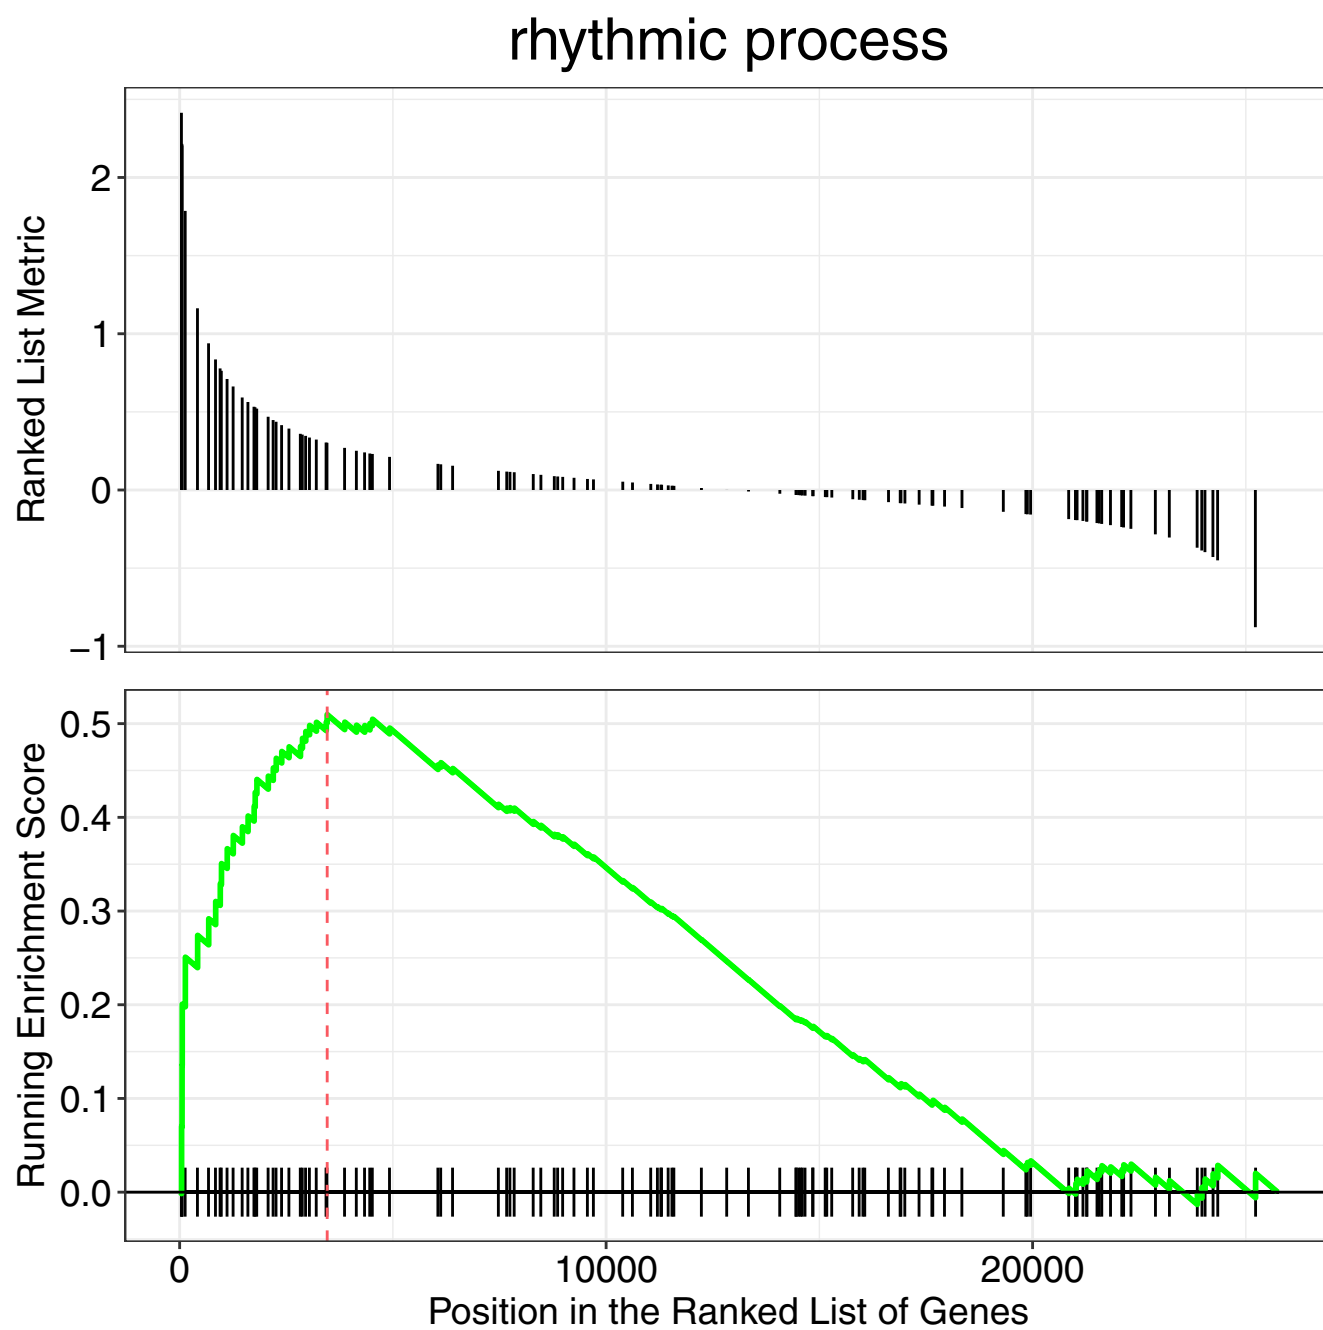

**Fig. S8.** Enrichment plots of Gene set enrichment analysis (GSEA) of differentially expressed genes in *alx1;alx3* crispants. Running score plot and pre-ranked list of all activated GSEA terms.

**Table S1. Differentially expressed genes in alx1;alx3 mutants.**

All differentially expressed genes with multiple-testing adjusted p-value smaller than or equal to 0.05 in 5dpf alx1;alx3 mutants when compared to age-matched alx<sup>uw2016</sup> siblings.

[Click here to download Table S1](#)

**Table S2. Gene set enrichment analysis (GSEA) of differentially expressed genes in alx1;alx3 mutants.**

All enriched GO terms with multiple-testing adjusted p-value smaller than or equal to 0.05 from all differentially expressed genes in 5dpf alx1;alx3 mutants when compared to age-matched alx<sup>uw2016</sup> siblings.

[Click here to download Table S2](#)

**Table S3. Differentially expressed genes in alx1;alx3 crispants.** All differentially expressed genes with multiple-testing adjusted p-value smaller than or equal to 0.05 in 3dpf **alx1;alx3 crispants** when compared to age-matched wildtype embryos.

[Click here to download Table S3](#)

**Table S4. Gene set enrichment analysis (GSEA) of differentially expressed genes in alx1;alx3 crispants.**

All enriched GO terms with multiple-testing adjusted p-value smaller than or equal to 0.05 from all differentially expressed genes in alx1;alx3 crispants when compared to age-matched wildtype.

[Click here to download Table S4](#)
